# Supplementary material for: Isolation and Characterization of Microsatellite Markers and Analysis of Genetic Diversity in Chinese Jujube (Ziziphus jujuba Mill.)
Source: PLoS One. 2014 Jun 16;9(6):e99842. doi: 10.1371/journal.pone.0099842 (PMC4059666; doi:10.1371/journal.pone.0099842)
Supplement: Table S1 — 1188 SSR markers developed in the study. The detailed information including accession number for the sequence, SSR motif, repeat number, TM value, GC value, expected size and primer sequence for 1188 SSR markers developed in the study. (XLS) [file pone.0099842.s001.xls]

## Sheet: Sheet1
Additional file 1: 1188 SSR markers developed in the study
Locus	GeneBank	Repeat motif	TM (°C)	GC(%)	Expected	Forward sequence	Reverse sequence
	number				size(bp)
BFU0002	KF265501	(AT)6	59.4/59.8	43.5/57.9	230	CCCACCTTAACTTTAAATCCAGG	GAAATGAGACTGCGGGGCT
BFU0003	KF265502	(TG)7	60.2/60.8	47.6/40.9	259	GCAGTTGGTGCGAAACTCATT	CGCAAAATTTTCAGGGATAACC
BFU0004	KF265503	(TTGA)3	60.5/60.2	52.4/50	216	TTCAGGTCTCCGATCCTTTCC	ATCCAAGTAACGCCGCATTC
BFU0006	KF265504	(TA)6(CA)6	60.6/58.9	47.6/43.5	195	TCATCCGCAACAGTTGCCTAT	CGTTATTTGACAGAGGACCAGAA
BFU0007	KF265505	(AT)11(GT)12	60/59.4	50/39.1	214	GTGAAAAGACGAACACAGCAGC	CTTGAATGAATCCTGATTCGTGA
BFU0008	KF265506	(ATAAAA)3	60/60.8	43.5/43.5	244	ACCTCTCGTGGATACGGTTTTAA	TGTGAGACTGTTTAATGGTGCGA
BFU0010	KF265507	(CA)16(TA)9(GA)10	59.7/59.2	43.5/43.5	206	CATTTTATGGACGATCTGTGTGG	GGGAACTACATTCTTGGTGGATT
BFU0011	KF265508	(TC)6(AC)9	59.8/59	55/45.5	210	GTTGGTGCTTAAGGGCGAAC	CATGGCTTGGTAATATGGTTCC
BFU0012	KF265509	(CA)13	59.1/59.7	55/52.4	266	GAATTGGGTATGGGGTGCTC	ACCCTATGCTGCTCAACCAGA
BFU0014	KF265510	(CT)16	59.1/59.7	55/52.4	266	GAATTGGGTATGGGGTGCTC	ACCCTATGCTGCTCAACCAGA
BFU0015	KF265511	(AC)9	59.1/60	43.5/55	125	CAAGGATTGGATCATCTCACTGA	CGGGCTCTCCTTGGTCATTA
BFU0016	KF265512	(TA)10	57.8/57.7	50/41.7	180	CCTTCCCTCTTTCTCTGTTACG	CTCCCTCTACATTTTATCGTTACG
BFU0017	KF265513	(TC)23(AC)12	60.3/59.2	43.5/36.0	316	TTTCTGGCTATGGCAAAGAGACT	TTATCTGTGAACTAAAAGGGCAACT
BFU0018	KF265514	(CT)14(CA)14	59.1/59.7	47.8/40.9	168	CCAACACTACAAAGTCTGGATGC	AGGGCAAAAAGGACTGATTGAT
BFU0019	KF265515	(TC)28	60.5/59.5	39.1/43.5	173	CGGATGGAAAATATGTCCAAAAC	TAATGGGGAAGAAGATGAGGAAG
BFU0020	KF265516	(TG)7(AG)18	59.5/60.4	41.7/59.1	263	CAAAACCTGAGATGAGGAAATAGC	GCGTAGAACCACTGTCTCCCTC
BFU0021	KF265517	(AG)23	59.1/60.2	45.5/52.4	203	AGCAAGTAAAGCAAAGCGTAGG	ACCCAACTTCCATTCTGTCCC
BFU0022	KF265518	(CT)14(AT)9	60.1/59.9	33.3/45.5	197	TTTTCTTCTTGGTCATTTTCTTGC	GCCCCAGAAAATACTGAAAACC
BFU0023	KF265519	(TA)11(GA)12	60.9/60.6	47.8/33.3	290	ACACAGGTCAAAAGGCATACAGG	TGCAGTTTGTTTGCATTATCAGAA
BFU0025	KF265520	(GA)22	60.9/60.3	50.0/50.0	145	CTGAAGCGGTGAAATCCCAA	CTTATCAAGTCCAACGGCTCCT
BFU0026	KF265521	(AG)22	60.6/60.4	41.7/47.6	129	TGTTCTATTGGCAACCTTATCCTG	TGAAGGTGCGTTCCAAGACAT
BFU0027	KF265522	(AG)21	60.8/60.4	55.0/50.0	339	AGGTTTGGGTCACTTGGGCT	GAGTTGACATTGGTGGTGACGA
BFU0028	KF265523	(CA)10(AT)10	59.3/58.9	60.0/50.0	213	CCTGGGAAGGCTCAGTCAAC	GGTAATCCCCATAGGAAGAAGG
BFU0029	KF265524	(AT)9(AG)11	60.1/58.9	39.1/41.7	205	ATGTTCAATGGATTTGGTTAGGC	TGAACCACTACACTCAGCCTTTTA
BFU0030	KF265525	(AG)19	60.3/60.4	43.5/37.5	180	TAGTCCTTTTCGCTTTTAGTGCC	GCATCGTATTTTGATTCACCACTT
BFU0031	KF265526	(GA)31	59.0/58.0	45.5/34.8	262	TATCTGCTACCCAACCCAAAAG	GTAGTTTAAAGGGGAAAATGCAA
BFU0032	KF265527	(CT)32	57.6/58.1	38.1/34.8	267	TTGTAATGAAAACGGGAGGAA	AATGATTGTTGTTGGTTCTTGGT
BFU0034	KF265528	(CT)19	59.7/60.6	50.0/45.5	205	AAGGCTCAGTCAACCCGAAA	TAATCCCCATAGGAAGAAGGCA
BFU0035	KF265529	(TC)10(AC)9	60.4/60.1	39.1/55.0	192	CTGGAACCCTTTTTGAGAAATCA	TGCCGAGTGATGTTCTGCTG
BFU0036	KF265530	(CT)19	59.8/59.8	52.4/40.9	169	GCATACCCGAGAATGGAGTGA	TTTGCCTCTTGGTTTTCTGTTG
BFU0037	KF265531	(TC)12(AC)7	59.4/60.7	36.4/55.0	148	AACGTTTTGCATTGATGCTCTT	CCAACATCGTGGATTGAGGG
BFU0040	KF265532	(TC)10(AC)8	59.6/58.6	45.5/50.0	152	TGTGGTTCTTTCGTAATCTGGC	CCTTTGCTGTTAGGCGATGA
BFU0041	KF265533	(AT)10(AG)8	57.6/57.5	43.5/41.7	239	ACACAGAGAAAGAACCACAATCC	TCCAACTAGAAGACAACTCAAACC
BFU0042	KF265534	(TC)17	58.1/58.8	38.1/40.9	128	TTTTGGCATTTCTTGACCTTG	GTGACGCACAAACAGAAAACAA
BFU0043	KF265535	(TC)17	57.7/58.3	43.5/42.9	167	ACTACGAAAAGTTGCCAGAAGAC	ATGGATTTTGGAGGAGTTTGG
BFU0044	KF265536	(TC)17	58.5/58.1	45.5/47.8	151	AACTGTCTTCTGTTGCTTGCCT	CAAATAAGGACACTGGGACTGAC
BFU0045	KF265537	(CT)17	57.1/58.1	33.3/33.3	242	GAAAAAGGAGATGAGAAACAGAAA	TCAAAAATCCAAAATGACCCA
BFU0046	KF265538	(AG)17	58.0/58.1	57.9/52.9	198	CCTGACAGCCCATCCCTAA	AGGGTTTTGCAGAATGGAGTT
BFU0049	KF265539	(CAA)11	58.8/58.0	40.9/34.8	278	TCACAAATCACCCACTTTCCTT	ATGTCACGGCTTTGTATTTCTTT
BFU0050	KF265540	(AG)16	60.4/59.6	40.9/45.5	218	TAATTGAAGCACGAATGGCCTA	TTCTTCCAGGTTCAGAGCATTG
BFU0051	KF265541	(TC)16	59.2/58.7	30.4/47.6	205	TATTTTTCCACCCATTTGATTGA	TTTCTCCATTAGGGGACCTGA
BFU0052	KF265542	(TC)7(AC)9	59.7/59.2	40.9/36.0	187	CAGGTTGCGAATTTTCTGTGTT	CATTGGTCCCTCCTATTTATGATTA
BFU0054	KF265543	(CT)16	58.4/58.6	50.0/32.0	128	GCAAGTCTTCGCCATTTCTG	GCATGGTTCTTATCAATTTACACAA
BFU0055	KF265544	(CT)15	59.3/59.4	52.2/43.5	207	ATGAGAGAGTGGCTTAGTGGGTC	ACATTCAGTGGTAAAGCAGCAGA
BFU0056	KF265545	(AG)15	58.9/59.8	40.0/57.9	217	CATGGATAGAGTCAGTATGGGTTTT	TCCCAATCAGCCAGCAGTG
BFU0057	KF265546	(GA)15	60/60	40.9/32	142	TTTTGGCTGAGCATCTGAACAT	TGAGTGATTCCAAAAGATTGATGTT
BFU0059	KF265547	(GA)15	59.6/59.2	36.4/46.9	193	TTTCCATTGCCAAAATCTGTTC	TTTGGTCGCCTGAGGTAATTT
BFU0060	KF265548	(CTCTCC)5	53.4/52.3	39.1/31.8	288	GTATCCTCGCATAATCTCTTCTA	ATATTAAGCTCCTTTCTCCATT
BFU0061	KF265549	(AG)15	60.1/60.2	63.2/50.0	207	CTCGCTGGTCGCTGTCTGA	CTCTGCAAATCCGCCATTCT
BFU0062	KF265550	(TC)15	56.3/56.5	36.4/40.9	180	GGTTGAAGGAATTGATCTGAAA	TAGTCCTTTGAATTGGGGTATG
BFU0063	KF265551	(GA)15	56.4/56.3	43.5/45.0	171	GTGCGTGTAGACAAAGAGATGAT	TTGTGAGGGCAGTTTGAAGA
BFU0064	KF265552	(TC)15	56.7/57.9	34.8/36.4	317	TCAATCCTAAAGCAAGATCAAGA	ACAAGCAAGCATTACATTTTCG
BFU0065	KF265553	(AG)15	57.8/58.1	45.0/45.5	125	TTTTTCCTTCCCAGGTCACA	GCAAGAGCAAATACACTGTCCA
BFU0066	KF265554	(GA)14	59.3/58.5	50/47.4	274	TGCATATATGTGCCTTGGCC	TCCAAACTCCAACCCGAAA
BFU0067	KF265555	(AG)14	57.4/58.5	42.9/52.6	201	GAAAAGCCAAGAACTCAACGA	AGAAGAGCCATGCCAACCA
BFU0068	KF265556	(AG)8(TGAG)3	58.0/57.4	45.0/34.6	304	CGGTTTACAAATCAGCGGTT	GTAACATTTCCAAATCCAAGCA
BFU0069	KF265557	(CT)14	60/60.1	63.2/52.6	165	GCCCACCGAATACCGAGTC	ATGCCCCATCCGCTAAAAG
BFU0070	KF265558	(CT)14	59.5/58.1	57.9/47.6	256	CCGTGGTGATGAGCAAAGC	CAACAACACAAAGTCCAAGCC
BFU0071	KF265559	(TC)14	58.8/59.3	43.5/63.2	198	GGTGCTAAAGAAGACAACATTGC	CAGAACGGAGTGGAGGGGT
BFU0072	KF265560	(CT)14	56.3/58.0	52.6/53.4	193	CGTGGCATTCCTCGTAAAC	AGAGAAATTGCCAGAAAGCAAT
BFU0074	KF265561	(TC)14	58.5/57.6	39.1/42.9	200	CTGTAAAAGAATAAAGCCGATGG	TGCCACCTTCAATATGCTCTT
BFU0075	KF265562	(TTTA)3(TTA)6*	58.1/58.3	52.6/30.4	243	ACGGTCCCACATTTTACGC	TTTCACTTTTGCCTATTTTCCAT
BFU0076	KF265563	(CCCTC)3(CT)7*	56.4/55.4	43.5/42.1	181	TTCCAACTCTACCCTTACCCTAT	AAATGGAACGGAGCAAAAG
BFU0077	KF265564	(TC)13	57.3/57.9	39.1/36.4	159	TCGAGCAACCAGATAAACTATCA	TTATTAGAAAAGCACGAAGGCA
BFU0078	KF265565	(TC)13	59.9/59.2	50/36	197	AAGTAGAAAGGAGGTGGGAGCA	CCTATTAGCATTGGAATCAAGTCAT
BFU0079	KF265566	(TC)13	57.2/57.7	55/34.8	229	CCTGCGGCTTTAGAGGATAG	AAAATTGTTAAGGCCCATTACAC
BFU0080	KF265567	(CT)13	58.5/59.6	43.5/57.1	354	GGGACGCACATACAAATAACTTC	GGGACCGAAGGTTATAGGCTC
BFU0081	KF265568	(AG)13	57/58	39.1/43.5	181	AGCCCAATCTACCAGTAATCAAT	CTGAATCGTCAAGAAGTGAAGGT
BFU0082	KF265569	(TTTC)3(TC)8*	57.4/58.0	33.3/50	239	TTAAGATGGCTTTATTTACATCCC	ACCCACGGCTTCAACAACTA
BFU0083	KF265570	(CT)13	59.9/60.3	52.6/55.0	181	TTTTCCAACCCTCCCTCCA	CCTCATAACTGCGACGGCTT
BFU0085	KF265571	(AG)13	56.7/57.8	34.8/39.1	212	TCAGAATCCAGATAGAAAGCAAA	TCAGGTTACGAGGACAGAAAAAT
BFU0086	KF265572	(GA)13	57.5/57.6	40/28	275	TTCTTTCTTTCGGTGGCATT	TATCTGATCATGCCATTATTCTTTT
BFU0087	KF265573	(TC)13	60.0/61.0	57.1/52.4	217	CGTGGATGACGAGGTCAGTTC	GGGAGGGGTGGGTCTTTTATT
BFU0089	KF265574	(TC)12	57.7/57.8	43.5/45.0	148	ACTACGAAAAGTTGCCAGAAGAC	TTCGGAGGAGTTTGGAATGA
BFU0091	KF265575	(AG)12	58.2/57.4	52.6/45.5	238	TGCGGCTCTAACCCACTTT	CTTCTTCGGATTCTTCGTCTCT
BFU0093	KF265576	(TC)12	57.4/57.4	45.5/40.9	159	TACCGTTGACTTCTTTGTGCTC	TATCCTGAATTTCTGCAACCTG
BFU0094	KF265577	(AG)12	62.0/61.5	66.7/45.5	192	GTCCAAAACGGGGAGGGG	ACAGCATTCAAGAAACGCAGGT
BFU0096	KF265578	(AG)12	58.4/59.7	42.9/55.0	292	AAAAAGTCACCGATCAAACCC	GGCAGAACAGAACCCGAAAG
BFU0097	KF265579	(AG)12	59.1/59.9	57.9/50	154	ATCAGAGGGCACTGGCACA	TCTCAGAGGTCTTTTGGGGTTC
BFU0099	KF265580	(AAAAAT)4	59.3/59.7	57.9/57.9	227	GGAATAGAAACGGGGACGG	AGAGCGAGAAAGCCAGGGA
BFU0100	KF265581	(TC)12	58.8/58.3	39.1/42.9	109	GTTATTGGTGGGAGCAAATGATA	ATGGGATTGGGAACAGAAAAG
BFU0101	KF265582	(TC)34	59.8/58.5	42.9/55.6	266	TTTTTGTCTTTTGCTCTGCCC	GTGGCGGGATTTCGTCAT
BFU0102	KF265583	(CT)24(TAT)7*	58.4/59.3	52.4/40	220	CTGTCCTAATGAATCCCCACC	CCATCTTGCTGAGACTAAAATGTCT
BFU0103	KF265584	(CT)24(AT)9	59.7/61.4	55.6/43.5	230	TATTTTTCCTCCCCGCCC	CAGGGACGCAAAATACAGAAGAA
BFU107(2)	KF265585	(TCT)11(TC)15*	59.6/59.5	50/45.5	242	CAATCCTTATCTCCTTCGGTCC	CTTTGTCGCTTATCGGTTTCAC
BFU108(2)	KF265586	(AG)27	58.6/59.5	45.5/54.5	216	TGCCAGAGTAAAGGAAAGAGGA	CACTCCACCAGTCCATCGTTAG
BFU0110	KF265587	(CT)26	58.3/60.0	57.9/59.0	241	CACCACCCCAATCCACCTA	CCCCTGCTGCCAAACTATGT
BFU0111	KF265588	(CA)7(CT)9(AT)10	61.9/62.7	45.0/54.2	344	CAAAAGGCGGGAAAAAGGAA	GCACCACCAGTATCAGAACCAGAG
BFU0112	KF265589	(TC)18(AC)8	59.6/59.9	43.5/44.0	276	TTTGAATATAAGTCCCTCCCTGG	CCACATGATAAAGTCGGTTAGCTAG
BFU0113	KF265590	(AG)26	62.4/63.3	52.4/42.8	307	TGGTCCTTTCTTCACGTTGGC	TACCCTGGCACACTCATTTTTCTG
BFU0115	KF265591	(AC)13(TC)11	57.4/57.6	36.0/30.4	186	TAATGTAAGTCCATAGAGTCCCAAA	AGAATCCAATCCAAAATGAATGT
BFU0117	KF265592	(AG)24	55.4/55.6	36.4/37.5	209	CAAACTCCTACATGAAAAAGCA	CACCAAGTCTTTCTCCTAATCATA
BFU0118	KF265593	(TA)8(GA)8(AGA)6*	62.1/61.4	47.8/54.2	256	GGAGTCCTTCCATCTTGGTTTGA	ATGACTTCCCACCTGGCTTTG
BFU0121	KF265594	(TC)22	63.2/62.4	43.5/41.7	203	ATCTTCTTTTCCTTTCCACCCCA	AATGGATCATGAATAAGACGCTGG
BFU0122	KF265595	(TG)12(AG)10	61.8/62.5	42.9/42.9	250	TTCAAATTCGGCGGCTTACTT	AAATGCCAACAAACGAAACCG
BFU0123	KF265596	(GT)7(GA)15	59.4/59.5	45.8/37.5	146	GGTCTTCCCTATCTGCTTACAATG	TCCACAGTTCTTGATTCATTAGCA
BFU0124	KF265597	(TC)22	61.6/60.6	50/36	224	CGCTTTATGAGGAATCGGAGTG	AACTGGTGGTTTTATGGACTTGAAT
BFU0128	KF265598	(CA)21	63.8/62.1	47.8/52.2	224	GGTGGCTTTTGACATAACCGACA	GAGTTGGAGGCTTTGAGTTGAGG
BFU0130	KF265599	(AG)21	60.9/60.4	47.8/57.9	112	GTCGCCTTACTACAATCAATCGG	GTCCCCCTGGCAGAAACAA
BFU0133	KF265600	(TC)20	61.7/59.2	66.7/32.0	136	CTACGCCCCGAAGCCTCA	ATCGAATCACAAAGATCCTAAAATG
BFU0137	KF265601	(AC)19	58.0/58.5	43.5/54.5	259	GTTTCACTCGCACTGTCACATAA	ACAGTCTGGACCAACTCGTAGC
BFU0138	KF265602	(CT)19	59.8/59.3	50.0/39.1	171	GCGCTCTTTCCTCTAGTCCAAT	AGATGAAATGTAACCCAAAACCC
BFU0139	KF265603	(TAGA)4(AG)12*	60.5/59.4	45.5/55.0	244	TCCGACCGTACAAAATCAGTGA	AGAGCGAGACGAATCCAAGC
BFU0140	KF265604	(TC)18	58.9/59.5	45.0/50.0	244	TGCACTTCGTACCTGCTACAAA	TCGGTGGATAGGAGTTCTGACA
BFU0142	KF265605	(GA)18	59.6/60.6	43.5/47.8	305	GCTACAATTTCTGATTCGCTGTG	TGCCTCTTCTGTGGTTTAGTGGT
BFU0143	KF265606	(TA)9(GATATA)3	58.9/61.3	39.1/47.6	301	ATAAAACGACCACAACAAACCAG	CGACGATGCCATGAAAGATTG
BFU0144	KF265607	(TC)8(TA)8	60.6/59.0	50.0/36.0	237	TTGGTGTGTTGTTGTCCGAGTC	TAAGAATAGTCCCCATAAGCAACAT
BFU0145	KF265608	(AG)16	60.04/60.01	42.86/42.86	195	TCGTCACTTTTCGCTCTGTTT	TTTCCATGACTGCTGCTTTCT
BFU0146	KF265609	(CT)16	59.88/59.13	38.1/47.6	332	TGTTGGCAATGTTGATTGTGT	TTTTGCAGTAGACTGGTGCTG
BFU0147	KF265610	(AC)16	59.93/60.10	47.62/47.62	156	AGCACAACAAGAGGTGCTGAT	AACCCCCAGTTTTCTACATGG
BFU0148	KF265611	(TTTA)8	59.56/59.69	41.67/42.86	245	GAGAGAATTGGGTTTAAGAAGTGG	TTGGGAACAAGAGCCAGATAA
BFU0150	KF265612	(AG)16	60.12/59.88	47.62/47.62	235	AAGCCCTCAAGTTTGGGTAGA	ATTGTCAGGGTCTGTTGTTGG
BFU0151	KF265613	(AG)15	58.94/59.85	47.62/42.68	180	GAACCATTGTCACTAGCAGCA	GCAGCATAGCACATGATCAAA
BFU0152	KF265614	(TC)15	59.84/60.10	38.10/42.86	242	TTGCCATGTGAATGGTGTAAA	GCAAACTGTCTGGGAATTTGA
BFU0153	KF265615	(TC)15	59.28/60.15	47.62/47.62	276	CCGGAAGTGTACCTAAGCAAA	AGCATTAACAGCTGGATGGTG
BFU0154	KF265616	(CT)15	60.06/59.60	42.86/47.62	167	CCGGGGTTGTCTTGAAATTAT	ATTCTTTGCCTCCCTAAGTGG
BFU0157	KF265617	(TG)7(GA)8	59.85/60.08	42.86/38.10	251	CCACCGATGAGGTTAAAAACA	AAACGAAACCCCACAAAAATC
BFU0159	KF265618	(CT)15	59.84/59.63	47.62/47.62	118	ATGGGTTCTGCTCAGGGTATT	CGAGCTCAGATAGAACGCAAT
BFU0161	KF265619	(AG)14	59.96/59.99	42.68/47.62	253	GGATGTGGTCGAACTCAAAAA	GTTGGTCTAAACCCGAAAAGC
BFU0162	KF265620	(GA)14	59.99/60.12	38.10/42.86	271	AAAGGTTCCAAAGCAAACGAT	GTGGAAGGCTGTAATGCAAAA
BFU0163	KF265621	(AG)14	60.57/60.18	47.62/42.86	221	CACTCAAACTGGGTTGAAACG	ATTGGTGGTGGTATTCCCATT
BFU0164	KF265622	(AG)14	59.01/59.95	43.48/42.86	158	CATTGGTAAAGGTCTGAGGATTC	TTTCCTTTTTCTCGCTCCTTC
BFU0165	KF265623	(CT)14	60.37/60.01	42.86/47.62	309	TCAGATCCGTCTTTTTGCTTG	ACCAGCTTTACCGACCTGATT
BFU0166	KF265624	(CT)14	60.00/60.07	40.91/50.00	185	GGCAAGAAACGTAAAAATGAGG	GATTTGGGGATCAGAGAGAGTG
BFU0167	KF265625	(AAG)9	60.05/60.01	50.00/50.00	177	CCATTCAGCTGTTGACAGAGAG	TGTAAAAGAGAGCCCTGAGGAG
BFU0168	KF265626	(TC)13	59.90/60.11	50.00/36.36	155	CCAGATGTGTCTCGATGCTTAG	AGGCAAGAAATCAAAAACCAGA
BFU0169	KF265627	(AG)13	59.89/60.17	40.91/36.36	297	GTGAATGCAAAGAAGATTGCAG	CAACAGATGCAAAACAAAGCAT
BFU0170	KF265628	(GA)13	60.12/60.00	45.45/45.45	197	AGACAAGTAGCAACAAGCACGA	CATCAAAGTAGCCCCAAACTTC
BFU0173	KF265629	(AG)13	60.05/59.89	36.36/45.45	163	ATGTTCCCAAAAGGATGATTTG	ATAGACAGCCTTGTTCCCATGT
BFU0174	KF265630	(AG)13	60.02/59.90	45.45/40.91	269	TGCTGATCCAACACCGTTATAG	ATGGTGAGCCAATTCGTAAGTT
BFU0175	KF265631	(CT)12	59.89/59.97	40.91/40.91	160	CATTGATGTTTGTATCGGCTGT	AAGGGATCAGATTGCAGTGATT
BFU0176	KF265632	(AG)12	59.83/60.16	50.00/39.13	191	GATGGATTAGGTCCTGGACAAG	CATCTTGATCAATGGATTCCCTA
BFU0177	KF265633	(TCC)4(TTC)4	59.91/59.99	40.91/36.36	246	AGTCTGTTTGTTTCACGGGATT	AGCAATTGGGCGTAATTTAGAA
BFU0178	KF265634	(CT)12	59.78/59.91	40.91/54.55	208	GATATCCAACCCCATGTGAAAT	GATAGAGAGAGTGAGGGCGTGT
BFU0180	KF265635	(CT)12	60.19/59.19	40.91/40.91	218	TGATCCTAACATTGTGGATGGA	TGAGATCTGCTCCTGAAGAAAA
BFU0181	KF265636	(AG)12	59.88/59.94	50/45	226	GCGAAGGAAACACACACTCA	GTTCTATTTGGGCGTTTGGA
BFU0182	KF265637	(TC)12	60.02/59.23	42.86/42.86	167	CATTGTGTTGGATGTGCAAAG	CCTTCAACTCCTGCATTGTTT
BFU0183	KF265638	(GA)12	60.47/60.35	47.62/42.86	178	ACGATTGCGAGGGATAAAGTC	GCCCTTGTTTGTTTCCATCTT
BFU0184	KF265639	(GA)12	59.81/60.13	42.86/50	246	GCACATGATGATGACCCTTTT	GCAACCTTTCACCCTCTCTATG
BFU0185	KF265640	(TTCTTT)4	60.10/60.08	40.91/42.86	230	TGCGATTGTCATGATAAGAAGG	TGCTTTTCATCCGAAGAGAGA
BFU0186	KF265641	(AG)12	59.78/60.25	42.86/47.62	219	TATGAATGGGGTTGCAGATTC	ACCTTTTCCTCCACACCAAAC
BFU0187	KF265642	(AC)12	60.86/58.78	52.38/52.38	276	CTGTAGACGTTCAACGCTTGG	CCAAGACTCTGAACCAACCTC
BFU0188	KF265643	(TC)6(TTTC)3	59.51/59.79	42.86/47.62	256	GACATAAGAGCAGCGCAATTT	CATACATCCCAGCCATGATCT
BFU0189	KF265644	(TC)12	60.49/59.92	42.86/52.38	292	CGGCACATTATGAAAACTTCG	CATAGCCAACTGCTTGTAGCC
BFU0190	KF265645	(GAGAAA)4	59.09/59.98	40.91/47.62	204	CCCTTGTAATTCAACGAGATCA	TTACCAGTTCCTTCCCGAGTT
BFU0191	KF265646	(GA)12	59.95/59.75	47.62/47.62	237	AAAGGAGTGGAGATCGGACAT	CGTAGCATTCCTTGAAAGTGG
BFU0192	KF265647	(TTTGGA)4	58.13/59.96	40.00/42.86	294	TCAGATTGCTGAAACAAGCA	CCGCCTGTTTTATTTTTCCTC
BFU0193	KF265648	(TC)12	60.10/60.37	42.86/47.62	209	ATGCTTCAGATGTTTCCATGC	CTTTCATCGGTGGTCATCAAC
BFU0194	KF265649	(CT)12	60.19/60.07	52.38/52.38	213	CCATACCTGGGGGAAGTAGAA	GACTCACCGGGAAGAGAAATC
BFU0195	KF265650	(TA)12	60.07/60.65	45/50	300	CTTTAAGACGGGGCAATGAA	GATGCCAAGTGGCTTCAAAC
BFU0196	KF265651	(TG)10(AG)19	59.75/60.12	42.86/47.62	240	ATTCAAAGTCATGCTGCCAGT	CCTTCCTGATGTGCCAACTAA
BFU0198	KF265652	(GT)11(GA)16	60.16/59.63	47.62/45.45	192	CAGGCTGGTTCTGATTGTTGT	CCTTAAACCTCCTCCTGAAACA
BFU0199	KF265653	(TC)18(AC)8	60.07/59.27	52.38/42.36	192	ATGGTCCTGGGACCTGTATTC	CCACAACCTGCAAGAAAAGTT
BFU0201	KF265654	(TC)25	60.12/60.40	47.62/47.62	155	TTAAGGCAGTCCCAATCACTG	GATAAGGGAAGGGAAGCATGA
BFU0202	KF265655	(TA)10(GA)15	58.43/60.98	42.86/47.62	295	TTGGTTGGTATAGCACCATTG	AGCAGAAGCACATGCTAACCA
BFU0203	KF265656	(TC)12(TA)13	59.99/59.95	42.86/42.86	281	TTTGTTCAACCAAGGGAACTG	CTGCACCCAGAATCCAATAAA
BFU0204	KF265657	(CT)24	59.2/60.12	45.45/42.86	296	GCTTCCTATTTTCCTTCACTGG	CACAATTCGGCTCACCTTTTA
BFU0205	KF265658	(TG)17(AG)7	59.24/59.09	47.62/47.62	287	TAAGCATGTCTGCTTCTGTGC	CGTTCACGTGCTCTCTATGAA
BFU0206	KF265659	(TA)9(GA)13	60.06/59.87	42.86/47.62	250	CCTCGTCATGAATCCTTCAAA	AAACATGCACGTACCATCTCC
BFU0207	KF265660	(TGA)4(AGA)6(AGAT)4*	60.10/59.97	47.62/47.62	216	AAGTCCGGTGGTGGTTTATTC	GCACACTGGAGCCCATATAAA
BFU0209	KF265661	(TC)9(TA)12	60.28/59.31	52.83/42.86	182	CGGATCGGTTGTAGCAGTAGA	CACACATGGTCCACGAAAATA
BFU0210	KF265662	(CT)12(CA)9	59.36/59.35	47.62/40.00	152	TTTCAGGTACTGAAGGCAAGG	ATGGATTCTCCATTCGCATT
BFU0211	KF265663	(CT)19	60.5/60.03	52.38/57.14	239	AACTTGCTGCCACAGTCTCAC	TCAGCTGTGGCTCTCTCTCTC
BFU0213	KF265664	(TC)12(AC)7	60.10/59.89	47.62/47.62	273	CCATTGACTCTCCCTTTCACA	TGGTTGACTGTTGATCTGCTG
BFU0214	KF265665	(CT)19	59.62/59.97	47.62 /47.62	297	CCAAAGCCGATAAGACGTATG	CTTCATTCATTGCTGCCTCTC
BFU0216	KF265666	(GT)18	59.22 /59.86	42.86 /47.62	297	ATTTCACCACAACAAGGGTGT	GCTCCTAGCCTTCGCATTTAT
BFU0217	KF265667	(GA)17	59.76/60.21	42.86 /42.86	224	TTCCAGCAAAGCACTTACCAT	TTTACCCCAACTTGGACATGA
BFU0218	KF265668	(AG)17	59.81/59.84	43.48/47.62	187	TGAAGAAAAGTCGGGACTACTTG	GAGGAAACTCAGAGGCGATTT
BFU0219	KF265669	(CT)9(CA)8	59.51/57.07	50.00 /34.78	234	AACCCATTCACTCTCCCTCA	CACGTGAAAGACAATTACTGAAA
BFU0220	KF265670	(GA)17	60.26/59.86	50.00/55.00	234	ATTGTAGGCCACGGTCATGT	GTGTGTGAGGGGGTTGAGTT
BFU0221	KF265671	(TC)16	60.08 /59.69	40/45	291	AAAGAAGGCAAAAGGGCATT	GGAAATTTTGAAGCGAGTGG
BFU0222	KF265672	(CT)16	60.00/60.29	55/40	280	AAGGCATAGGCACAGTCGTC	TTCATGCAGCAAAAAGCAAC
BFU0223	KF265673	(TC)8(AC)8	60.21/60.25	55/40	287	TCCCTGCAGGATTGTCTAGG	TGCGTTGGCTTAAAATGTCA
BFU0224	KF265674	(TC)16	59.92/59.97	45/50	203	AGCTGCGAAACAACAAACCT	CCCAACTCAACCTCAATCGT
BFU0225	KF265675	(TC)16	59.99/59.39	55/50	153	CGTCCTCTTGTTCCTTGCTC	CAGGCGAAGAGGAATCTCAT
BFU0226	KF265676	(GA)16	59.96/59.45	45/45.45	185	ATGCCTTTTAACGGATGTCG	CACTTGTTGAATATGGGAGACG
BFU0227	KF265677	(GA)15	60.04 / 59.81	45/45	254	TTGATTTTCGAGGTCCTTGG	AAGGTAAACCCCGGAGAAAA
BFU0229	KF265678	(AG)14	60.08 /59.72	45/50	273	ACCATAACCGCCATTCACAT	GGTGTTACGATCAACGAGCA
BFU0230	KF265679	(CT)14	59.84 /59.00	55.00/45.45	263	CTCTCTTTTAGGGGGCTCGT	GCAGCAGTAGTGTGAATTGTGA
BFU0231	KF265680	(AG)14	60.78 /60.30	45/50	207	TTTCAACGCGATCAAGTCCT	TACATGCACAGCATCGTCCT
BFU0232	KF265681	(CT)7(AT)7	60.34/59.58	50/60	291	ATGGCAGGTGGTATGGAGAA	GACTGAGTGGAGGTCGCTCT
BFU0233	KF265682	(GA)14	59.59/62.85	40.91/43.48	150	GGCACATGTAAATAATGGGTGA	TGTCACGATAAGAAAGTGCCACA
BFU0235	KF265683	(TC)14	59.81/59.49	50/50	192	GAATCGCCAAGAAGTGAAGG	GCCTATGATCAAGCCCAATC
BFU0236	KF265684	(CT)13	59.23 /60.15	60/50	209	CACCACTACGACGACTACGG	CGGATTAGGAAATGGGACCT
BFU0237	KF265685	(AG)13	59.25 /59.92	54.55/45.00	192	CCCTGTTCTCTTCTACCCACTC	CATCTTGTGCAATTGGGATG
BFU0238	KF265686	(TG)13	61.25 /59.89	45/45	177	GCATTTTTCATGCCATGTCC	TTTTCTGCCAACTTGCACAC
BFU0239	KF265687	(AG)6(AGAGAC)3*	60.08/59.80	45/55	208	AGCCATTTCCAATCAAGCAC	AGGTGGGTGTGTGTGTGTGT
BFU0240	KF265688	(TC)13	60.46 /60.20	45/50	287	TTGTGGGATTCAGCATTCCT	GGGAGATCAAAACAGCCAGA
BFU0241	KF265689	(TC)13	59.20 /59.88	42.86 /50	242	CAAGGGAAACTTCCTTTCACA	ACACGCCCTCGAAAAGTAGA
BFU0242	KF265690	(AC)13	60.21/60.52	40/50	108	ATCACCAACCAAACGGAAAA	ATTGGTGGCTCTGACGGTTA
BFU0243	KF265691	(CT)13	59.96/59.98	42.86/45.00	172	AAAAGGTTTCCCAACCTCTCA	AAACGGCCATTCTCAACAAC
BFU0244	KF265692	(CT)12	60.05 /59.96	40/50	290	GGAATTTTCCGTTTGCTTGA	TAGGGCCAAACCATAACTGC
BFU0245	KF265693	(CT)12	58.88/59.80	40.91 /45.00	227	CTTGGATGACTTTCTGTTTTGC	ATCATGGTTGTGCCTTTTCC
BFU0246	KF265694	(GA)12	59.74/59.84	40.91/40.91	100	AATGAGAAGTTGTTGGGGGTTA	TCTTTGAAGAAAGAGGCCAATC
BFU0247	KF265695	(TC)12	60.80 /59.92	50/50	186	TCTCGACAGTTGCCCATCTT	AAGCCATGGTGGAGATATGC
BFU0248	KF265696	(GA)12	59.74 /59.60	47.62/42.86	227	AATCAAGTAGGCCCAAAGAGC	TTTTGGAAGGTACTTGGACGA
BFU0249	KF265697	(GT)12	59.84 /60.07	55/55	267	AATGGGTCCACGTAGACAGG	GCCCTGAGGTTGGACATAGA
BFU0250	KF265698	(AC)12	59.15 /59.99	50/40	224	ACACACGGTTGAAGAGTCCA	CGAAACATGCAAGCAAAAGA
BFU0251	KF265699	(GT)12	60.14/60.37	42.86 /50.00	151	TGACCTCCAATCCCATATCAA	CCTCCAGCAAGAACCTTTCA
BFU0252	KF265700	(AG)12	59.19 /60.22	42.86 /45.00	189	CACGATGAGTGAACAATTTGC	CATGTGGGGACACAATCAAA
BFU0253	KF265701	(TC)12	59.15/60.09	40.91/47.62	206	GTTCAAATGATGGACATTCACC	ACGCAAACCTCCCCATTATAC
BFU0254	KF265702	(AC)12	59.75 /60.01	42.86/42.86	177	GCTTTTGGTTTCCGTCTTTCT	TGATCAAGAAGCCAGTGCTTT
BFU0255	KF265703	(GA)12	59.59/60.13	42.86 /52.38	161	TACCGGCTGAATATAGCCAAA	GTGCAATCTACTCCCACTCCA
BFU0256	KF265704	(CT)12	60.16/60.15	52.38/42.86	178	GTGGAAGAAGCAGTGGTGGTA	CCAAAAGGCCCCTGATATAAA
BFU0257	KF265705	(GA)12	60.07/59.90	47.62/47.62	175	GACAAAACACCTGGCAACAGT	AGAAGCACTCCTCACCAAACA
BFU0258	KF265706	(AAT)4(TAAT)4*	60.00/60.08	47.62 /47.62	189	CTGAATCGCCAAGAAGTGAAG	TGATCAAGCCCAATCTACCAG
BFU0259	KF265707	(GA)12	59.99/59.60	47.62/47.62	192	GTGCTGATGATGGACAAACCT	AGCCTGGGGTAGAATTGAAAG
BFU0260	KF265708	(CT)11	60.04/60.06	47.62/42.86	179	CAACAAGCCGAGTGTGGTATT	ATGTCACACCAGCAACACAAA
BFU0261	KF265709	(CT)11	59.97/59.87	52.38/47.62	219	GCGGTTACCTCATCCCTAAAG	GGAACTGATGCTTGTTTCTCG
BFU0262	KF265710	(TC)11	59.60/59.55	42.86/42.86	116	CTTCTTTGTTTTCCACCATGC	ATTGCATGTGATGATCTGTGC
BFU0263	KF265711	(CT)11	59.97/59.93	47.62/42.86	283	GGTTTTTGTGGGTATGGAGGT	AGGAAAACAAAGGGATGGAGA
BFU0264	KF265712	(TC)11	60.08/60.41	47.62/57.14	240	TGAGACTGGCTATTCCCCTTT	AGAGGAGGGTGGTAACAGGTG
BFU0265	KF265713	(GA)11	59.58/59.99	42.86/42.86	257	AAGAGACCGGATGTTGACAAA	ATCGTCATCAAGGTTTGAACG
BFU0266	KF265714	(AC)11	60.23/59.75	42.86/47.62	229	TGGCTTTTCCCTGTTCTTTCT	AGCACCTCGTATTCAGGACAA
BFU0268	KF265715	(GA)11	59.61/59.77	47.62/47.62	228	TGCTGCTGAGTTGTCATCCTA	CACTGATTACTGCACCGTCAA
BFU0269	KF265716	(TC)11	59.94/60.03	40.00/42.86	280	CCCAAGTTTAAATGCGGAAA	AAATTGGGCACCATCTAATCC
BFU0270	KF265717	(AG)11	60.06/60.04	42.86/47.62	179	ATGTCACACCAGCAACACAAA	CAACAAGCCGAGTGTGGTATT
BFU0271	KF265718	(AC)11	59.14 /59.99	47.62/42.86	201	AGCGTCGACTCTTCCTAAACA	ATGCTTTGTCATGGTCGTTTC
BFU0272	KF265719	(CA)11	59.75/60.01	42.86/42.86	177	GCTTTTGGTTTCCGTCTTTCT	TGATCAAGAAGCCAGTGCTTT
BFU0273	KF265720	(GA)11	60.16 /59.32	52.38/45.83	193	TTGGGTCTTAGGACGTCTGTG	TGTACACACATTCTCTCTCCCTCT
BFU0274	KF265721	(CT)11	59.94 /59.88	52.38 /52.38	143	TCTCTTCTTCCCCCTTCTCTG	GGCTCTGAAAGCTGAGTCTGA
BFU0275	KF265722	(CT)11	60.40/60.53	50.00/52.38	221	GCTCAATAAGCAACTCCTCGAC	CCCAAGAGGACTGGTGAAACT
BFU0276	KF265723	(GA)11	60.00/60.27	52.38 /52.38	278	CGTGAGAGAGACCGAGAAATG	AGAGACTGCCCATCTGGAACT
BFU0277	KF265724	(GA)11	60.16/59.90	52.38/47.62	236	GCACTACCCTGTGGAACTCAA	AGTGTTGACCTGGCAAGAAGA
BFU0278	KF265725	(TG)11	60.72/59.72	52.38/50.00	229	TAGGAGCCGAAGAACTCCATC	CATTGCGCCTCTCTTTCTCT
BFU0280	KF265726	(ATA)7	60.06/60.13	47.62/47.62	264	CAACAAACCTGACCGTTGAGT	TAATGTGGTTGCTCGGAGTTC
BFU0281	KF265727	(CAC)7	60.00/60.22	57.14 /42.86	237	AGAACGGGGAGAGAGAGAGTG	GATTTTAAGCGTGGATGCAGA
BFU0282	KF265728	(TC)10	59.98/ 60.01	42.86/42.86	292	CCTTGATCGAACCACGTAAAA	AGCTACACAAAAGCCCCAAAT
BFU0283	KF265729	(AT)10	60.03 /59.87	47.62/47.62	282	ATCAAGTGCTGTTTGGTGTCC	GAGAGGCATGATCCCATGATA
BFU0285	KF265730	(AC)10	60.09/60.00	42.86 /42.86	288	GCCATTTCCAATCAAGCACTA	TTATGCTGCTGCTTCCATTCT
BFU0286	KF265731	(AG)10	59.85/60.02	42.86/57.14	266	GATTGTTGCTGGTTTCCATGT	CTGGACTCTCCGATGCAGTAG
BFU0287	KF265732	(CT)10	59.88/59.86	40.00/50.00	103	GGGATTGGAAATTGCTTGAA	TCAATCCGCGTAGTTCAGTG
BFU0288	KF265733	(GA)10	59.82 /58.67	60.00/42.86	118	CCCAGGATAGCCAGTCAGAG	AATTACATGCACAGCATCGTC
BFU0289	KF265734	(CT)10	58.83/59.26	40.91/55.00	161	TTCCAACACCCAATATCTATGC	GTTTCATCCCCAGGGTACAG
BFU0291	KF265735	(TC)10	60.60/60.05	50.00/45.00	156	TGCTCCGCTTACACTGTTGA	GCCAATGTTTTCTTCCTCCA
BFU0292	KF265736	(CT)10	58.80/59.79	39.13/50.00	293	TGGTTCTGATTATAGTGCTGCAT	TCTCATCAGACCAGCATTGG
BFU0293	KF265737	(GA)10	60.08/59.80	45.00/40.00	160	GAGCCCATTTGCTGTTTGAT	CCCATTCATTTGCTGGTTTT
BFU0294	KF265738	(GA)10	59.55/60.11	50.00/55.00	236	TGCTTCAAGTGAGGAGGTCA	CGATCACTTCCACTCCACCT
BFU0295	KF265739	(CT)10	59.96/60.37	50.00/50.00	200	CAGAGCCTGCAAAAAGATCC	ACTCATTCTCCGCTTGCATC
BFU0296	KF265740	(CT)10	60.00/59.75	55.00/52.38	135	AGGACACAGGTGGGAACAAG	TGGAGACACTGCTGTGAGAGA
BFU0297	KF265741	(AAATT)4	60.05/60.07	55.00/50.00	173	TCCTCCTTCTCATCCACCAC	CTGCTCCCAAGGAATACCAA
BFU0298	KF265742	(GA)10	61.00/60.25	50.00/45.00	242	GGCATGCATGGAGGTTCTTA	CTCAAATGGCAAAACCTGCT
BFU0299	KF265743	(GA)10	59.84/60.80	50.00/55.00	214	TGAAGCTGTGGAAGGAGGTT	CCGCCACTGCTAATGAACTC
BFU0300	KF265744	(AG)10	59.29/59.41	40.00/45.00	147	TCTGCCTTTCACCAACAAAA	TGTTGCTTTCTCTCCACCAA
BFU0301	KF265745	(TC)10	58.39/60.52	40.00/40.00	230	TGGCTTTCATTATTGCGTCT	GCCTCTGTTGAAGCAAGGAA
BFU0302	KF265746	(TTTTA)4	59.81/59.49	50.00 /50.00	192	GAATCGCCAAGAAGTGAAGG	GCCTATGATCAAGCCCAATC
BFU0303	KF265747	(AG)10	59.89/59.59	50.00/50.00	294	TCACCACAACAAGGGTGTGT	GCTCCTAGCCTTCGCATTTA
BFU0304	KF265748	(CT)10	59.89/58.73	55.00/42.86	104	CACACACACAAACCCACCTC	CAAAACCAACCCAAAGAAGAG
BFU0305	KF265749	(GA)10	59.84/60.80	50.00/55.00	214	TGAAGCTGTGGAAGGAGGTT	CCGCCACTGCTAATGAACTC
BFU0306	KF265750	(GT)11	58.94/59.48	47.62/50.00	190	GAACCATTGTCACTAGCAGCA	AAGTTTCTGGGCAGCATAGC
BFU0307	KF265751	(TC)11	59.93/60.08	50.00/40.91	188	AACCAGCATCAGATGGAACC	GATCTCAAGCACATCCATCAAA
BFU0308	KF265752	(TC)11	60.02/59.64	40.00/50.00	176	TTTCCACCCCAAAATACCAA	AGACGCTGGATGAGGATGAT
BFU0309	KF265753	(TC)11	59.80/59.25	50.00/55.00	154	AAGGGGGAGAGTGGGTTTTA	CCCTCCCTTCCTCTTCTTTC
BFU0311	KF265754	(AT)11	59.14/59.80	57.14/42.86	300	GGAGCCCATCTCTCTCTCTCT	TGAAGAATCTCGGTGGAGAAA
BFU0312	KF265755	(AT)11	60.58/58.39	45.00/40.00	253	TCCTAGCGGAATGTTTCCAA	CCATCCAAAAGTTCAATCCA
BFU0313	KF265756	(AG)11	59.62/59.01	50.00/50.00	119	ACTGCGAGAAACCGTACCAT	CGAGGTTACCATCCGATTCT
BFU0314	KF265757	(TC)11	59.74/60.16	50.00/50.00	273	CCCCTTCTAATGATGGGTGA	AGGACTGCAAGCTGCTCATT
BFU0315	KF265758	(CT)11	59.82/59.69	43.48/50.00	187	TGCGATGTGAAGTACTACCTGAA	TCCCTTAAGCCGACATGAGT
BFU0316	KF265759	(AG)11	60.17/59.89	55.00/55.00	128	TATCTCATCGACCGGAGAGG	CCTGTGCGCTTTCTCTCTCT
BFU0317	KF265760	(GA)11	60.03/60.07	45.00/50.00	179	GACCCAAGAAACCCCAAAAT	TCCCATTACTCTTGCCCTTG
BFU0318	KF265761	(TC)11	60.00/60.22	50.00/45.00	300	ACCGCGTAATGTTGGACTTC	TTCTGCACGGAATCGATGTA
BFU0319	KF265762	(TC)11	60.64/60.11	50.00/45.00	209	CCCTAATTGGTGCCATGTGT	TTGTTAGTGTTGGGCGATCA
BFU0320	KF265763	(AG)11	60.18/59.92	50.00/40.00	254	TGCAACAACAGGCTTCTCAG	TTTCATGCTTGGGGTTTTTC
BFU0321	KF265764	(TC)11	58.45/59.84	40.91/45.00	298	AAACATAGAAGGTTGCTGTTGC	CGGCAAAATGTTCACAGAGA
BFU0322	KF265765	(CT)11	59.47/60.34	50.00/42.86	276	CCTCCTTGCAACGTCTCTTT	CGAGATGCTTTTCTCCAATCA
BFU0323	KF265766	(CTG)7	60.15/60.46	55.00 /45.00	178	CACTCGACCACCTTCCAACT	GTATGCGCGAATTTTTGTCC
BFU0324	KF265767	(TAA)7	60.49/59.69	47.83/40.00	300	CCAACTATACATCCACCCATCTG	CGCATCATTTTGCATGACTT
BFU0325	KF265768	(CT)10	59.04/59.90	55.00/42.86	174	GTGACTCTGCGAGTCCGTTA	TGCGTTTCTTTGACACAGATG
BFU0327	KF265769	(AT)10	59.12/60.47	40.91/40.00	100	GTCAACAAAGGACCTGAAACAA	CATGATTCCGCACAATTTCA
BFU0328	KF265770	(TC)10	58.99/59.94	40.00/55.00	245	TCAGCTGCAAAACATCAACA	TCCAACTCTCCCCAGCTAGA
BFU0329	KF265771	(GA)10	59.94/60.02	45.00/50.00	278	AATTGGACGCCAAATCAGAC	CTGAAACGCAGTGAAGTGGA
BFU0330	KF265772	(CT)10	61.39/60.03	55.00/50.00	197	CCCCACGTTCTCTGCCTAAT	AAGGGAGAGGGGCAGATAAA
BFU0331	KF265773	(TC)10	59.95/59.96	50.00/42.86	295	TGGGAAATACGGTTGCTAGG	TGGTTTTGGTATGGTTGGGTA
BFU0332	KF265774	(AG)10	58.43/59.97	40.91/55.00	146	CAAAAGACGTAAAACCAGGAGA	ACTTCTCCTCTGGGGTGGTT
BFU0333	KF265775	(GA)10	60.07/59.97	50.00/45.00	254	GGAAGCAAACGGTGATCCTA	TGATGCAACCCACAATCACT
BFU0334	KF265776	(ATATT)4	60.10/60.09	40.91/45.00	177	TGCGATTGTCATGATAAGAAGG	GTTCCCCTTTTGCACTTGAA
BFU0335	KF265777	(TC)10	60.18/60.08	50.00/42.86	110	CCCCTACGGAAAAACCATCT	TGCTTTTCATCCGAAGAGAGA
BFU0336	KF265778	(AG)10	60.07/59.82	50.00/55.00	194	CCAGGACCTGCAGAAATGAT	TGTTCTGGGTAGGTGGTTCC
BFU0337	KF265779	(AC)10	59.86/59.23	45.00/45.00	209	CATCCTTTGGAAGGGAATGA	GGGGAATTTGGCAATCTATG
BFU0338	KF265780	(TC)10	58.55/60.39	40.00/55.00	214	CAGGACAAATGAATCCGAAA	TCACTAACCTTCCGGAGCTG
BFU0339	KF265781	(AG)10	60.01/60.02	50.00 /60.00	143	ACAACTTGAAGCCCACCAAC	GGCGTCTCTGTTGCTAGTCC
BFU0340	KF265782	(TTTA)5	60.20/59.52	55.00/40.00	233	TGCTCTGCACTTCGTACCTG	CTGACATGGAAAATGGCAAA
BFU0341	KF265783	(TTAA)5	58.06/59.99	42.86/50.00	225	CTGGCGGTGATATGTAATTTG	GCACGCAATTATACCGACCT
BFU0342	KF265784	(GA)10	59.96/58.86	55.00/45.45	215	ATCCAACAGACTCCCCAGTG	TGCTCTTTTTCGTCTCTGTCTC
BFU0343	KF265785	(AG)10	59.99/60.19	55.00/55.00	169	CCAACCTGGCTCATACCAGT	TTGCTGCTCAGTCTCCACAC
BFU0344	KF265786	(TC)10	59.96/59.99	45.00/55.00	106	CCTTAAGCCCATTGCAACAT	GGGTTGAAGACGAAGCAGAG
BFU0345	KF265787	(TTCT)5	60.00/60.17	45.00/55.00	208	CGACACCGTTTTTGGCTAAT	AACGACCTACGTCCTCGTTG
BFU0346	KF265788	(CT)10	60.07/59.65	50.00/50.00	295	TTTGCCCGTAGATCCTTCAC	TACCATGTCCGTGTCCCATA
BFU0349	KF265789	(TC)11	59.71/59.68	45.00 /50.00	248	TGAAGCCAAGCAGCAATAGA	TCGATGACAAGGGTTGAGTG
BFU0350	KF265790	(AG)11	59.97/59.48	45.00/42.86	217	CATTCTTGGTTGGGTTTGCT	TTTGCTACAATGCACTCTGGA
BFU0351	KF265791	(TC)11	60.08/59.97	42.86/50.00	193	TCCTTTTGGGTTTTGTTACCC	CAGACGGATGAGGTTGGTTT
BFU0352	KF265792	(CT)11	60.39/59.86	55.00/50.00	151	GGGTTTGACAGCCAGAGAGA	CGACACAGCGGAGTAAATGA
BFU0353	KF265793	(AT)11	59.86/59.77	45.00/55.00	273	ATAACGGTTCCGTTTTCACG	GATCCAGAACGAGGATCTGC
BFU0354	KF265794	(AG)11	58.13/59.95	45.00/50.00	193	GCACGATCGACAAACATACA	TCGGCCAATCACTCTCTCTT
BFU0355	KF265795	(AG)11	59.97/59.86	45.00/60.00	277	GCACGAATGGCCTAACATTT	CTAACAGCCCACTGGGAGAG
BFU0356	KF265796	(CT)11	59.47/60.34	50.00/42.86	276	CCTCCTTGCAACGTCTCTTT	CGAGATGCTTTTCTCCAATCA
BFU0358	KF265797	(AT)11	59.53/60.06	50.00/60.00	156	GCATATGGTGGTGCGAGATA	CCTACCCTCCTCCTTTCAGG
BFU0359	KF265798	(TC)11	59.62/59.40	33.33/31.82	299	TTTTTCACTTTTTCGGTGCAT	CGCTTCAAAATTCAGAAAACAA
BFU0360	KF265799	(GA)11	59.56/59.81	42.86/45.00	157	CCCATCTTGATGTTTTTGCTC	TGGGTTTCCAACAAAAGGTC
BFU0362	KF265800	(CT)11	60.07/59.41	55.00/43.48	239	CTTCTCCATACGTCCCTCCA	CCAGCGAATATTCTTTGTCTCTC
BFU0363	KF265801	(AT)11	60.36/59.57	50.00/50.00	234	ACACCAGATCCTGGGTTCAA	AGCCTTCCAAGCAATCTGAG
BFU0364	KF265802	(TTTA)3(TTA)4*	59.91/58.09	50.00/40.91	112	TCTCCTTCTCAAGCCCGATA	ACACCCTCCCCTAAGATAAAAA
BFU0365	KF265803	(CTT)7	60.07/59.17	55.00/47.62	176	CTTCTCCATACGTCCCTCCA	GAGGAGGAGACCAAACAACAA
BFU0366	KF265804	(GAA)7	59.99/60.12	55.00/45.00	205	CGAAAAGCCAGGTCACTCTC	AAAGGATGGCAAAACAGTGC
BFU0367	KF265805	(AT)10	59.88/59.97	50.00/50.00	195	GCAAAGCGTAGGTTTTGAGG	CGACCCAACTTCCATTCTGT
BFU0368	KF265806	(GA)10	60.54/59.87	45.00/50.00	137	TAGTGCAAGGCAATCTGCAA	GCGGCTAACAACAGTCATCA
BFU0369	KF265807	(CT)10	59.86/59.97	50.00/45.00	256	CGCTTAAAAGCCTCGAGAGA	TTCAATCACCTGCACCATGT
BFU0371	KF265808	(GA)10	60.51/60.58	50.00/39.13	202	GCTGGAAGAGATGCAGCAAT	TGTCATGTTAAGAAAGTGCCACA
BFU0372	KF265809	(AG)10	59.86/58.60	50.00/50.00	167	TGCTTACGATGTCGTTGGAG	CCACTGAAAGCGAGATTCTG
BFU0374	KF265810	(TC)10	59.80/59.59	60.00/50.00	111	CCCTCTCCACCTCCTTCTCT	TCAAGTCGCTAACACGGAGA
BFU0375	KF265811	(GA)10	59.66/59.29	34.78/43.48	193	AAAAATCTTCTTCAGCATTGTGG	TCTCTCCCCTTAAAAACCTCTTC
BFU0376	KF265812	(AG)10	58.91/58.26	50.00/55.00	290	GGTAAAACTGGGATGCAGGT	CCCGATGACATCACTAGAGC
BFU0377	KF265813	(CT)10	60.10/60.49	50.00/45.00	283	CCAGCTGGTATCCAATTGCT	ACGACGATGCCATGAAAGAT
BFU0378	KF265814	(ATTT)5	59.47/60.34	50.00/42.86	276	CCTCCTTGCAACGTCTCTTT	CGAGATGCTTTTCTCCAATCA
BFU0379	KF265815	(AG)10	60.15/60.05	40.00/50.00	262	TATGGCATTTCCGGTTTGAT	ATACCAACGAACCCCTTTCC
BFU0380	KF265816	(TA)10	59.40/60.39	50.00/45.00	119	TCTCCTTCGTCCTTCCTTTG	GCTTTGTGCTGCCAATCTTT
BFU0381	KF265817	(GA)10	59.81/59.25	45.00/50.00	205	AAGAGCCTTCAACCGAATCA	CTTTCTTCCCTCCCACTGAA
BFU0382	KF265818	(AG)10	59.98/60.11	45.00/50.00	197	GTTGTGCGGGACTTCAATTT	AATGGTGCAAGAAGGGACAG
BFU0383	KF265819	(AG)10	59.75/59.13	40.91/55.00	170	TGATCTAGCACCCAACAAGAAA	AGGCTCTTCAGGACTCTGGA
BFU0384	KF265820	(TC)10	60.36/59.98	55.00/50.00	184	GGGTTGATCCACTGAAGGTG	CAAGCCAGTCATCGAGTTCA
BFU0387	KF265821	(ATTT)5	59.47/60.34	50.00/42.86	276	CCTCCTTGCAACGTCTCTTT	CGAGATGCTTTTCTCCAATCA
BFU0388	KF265822	(TG)10	59.89/59.70	50.00/45.00	140	GACCCTTGCAGGGATATTCA	AGCAGGCATGAGTTGGATTT
BFU0390	KF265823	(GA)10	60.01/60.05	45.00/55.00	259	TTGTGTGGTTGGCTGTTGAT	ACCCCTCCCATCCTTGTTAC
BFU0391	KF265824	(AG)10	60.02/60.11	40.00/40.00	129	GAAAATCCCAAAATCGCAGA	CTTCACCGCAAAACGAAAAT
BFU0392	KF265825	(GA)10	58.35/59.99	47.83/40.00	115	TGCATCTGTAACCGTACTAGGTC	TCAACATTTCATCCCCCATT
BFU0395	KF265826	(GA)10	60.77/59.93	36.36/50.00	102	TGGAAGCAAAAATTATCCCAGA	TTGGAGTTAAGGACGGATGG
BFU0400	KF265827	(AG)10	60.38/60.30	40.00/50.00	196	TGCAAAGTGGCTCATTGAAA	CTACACAAAGGCGGTTTGCT
BFU0404	KF265828	(TC)10	59.97/59.85	50.00/42.86	288	AGCCAGGTCCATTTCAACAC	GCATGCATGAGTATGCAAAGA
BFU0406	KF265829	(TA)10	59.70/60.08	42.86/50.00	244	CATCATGCATAAAGAGCACCA	CCCTCAAAGAACCAACCAGA
BFU0407	KF265830	(AG)10	59.94/59.94	45.00/45.00	161	TGGTTTTCAGAGGGTTTTGG	TTCAAACGCTACCCATTTCC
BFU0411	KF265831	(TC)10	60.01/59.89	42.86/40.00	202	GACCCAAATTCCCTATTTCCA	AACAGCAGCGAAACGAAAAT
BFU0412	KF265832	(AG)9	60.86/58.92	50.00/45.00	124	AGATTGCACAACTGCCTCGT	GCTCATCTAAAACCGCAACA
BFU0413	KF265833	(TC)9	60.05/59.64	50.00/47.62	266	TGGTGTGTTGTTGTCCGAGT	CGTTTCGAGGCTAGACAAAGA
BFU0417	KF265834	(AAAAAT)3	59.78/59.99	40.00/45.00	286	TGGCACATAAAATGCCCATA	CAGCCACATGCAAAAGAGAA
BFU0418	KF265835	(AG)9	60.05/60.35	35.00/50.00	252	TCAAAATGCATTCGGTCAAA	CAGGGTTCATGGTTCGTTTC
BFU0419	KF265836	(TC)9	60.60/58.75	50.00/40.00	286	TCGTCTACGGCTTCCCATTA	CCAATTGAAAGAAACGACGA
BFU0420	KF265837	(GA)9	60.00/60.33	45.00/50.00	179	GACCTTGAAAAGCGCAAAAG	TTTGCTGAGCTGTGAGTTGC
BFU0421	KF265838	(AG)9	59.94/60.13	45.00/60.00	255	GATCGCACCAAAGTGGATTT	CCCTCTCTCTGCTTCTGTGG
BFU0423	KF265839	(AAG)6	60.07/59.82	50.00/55.00	194	CCAGGACCTGCAGAAATGAT	TGTTCTGGGTAGGTGGTTCC
BFU0424	KF265840	(TTG)6	60.03/60.19	40.00/45.00	209	AACCCGAAAATTCCAAAACC	GATCCGAACGAGAAAACGAA
BFU0425	KF265841	(AG)9	59.46/60.11	42.86/40.00	219	TCCCAGGGCTAAATTAACACA	CACTTTCGTTTGCGGATTTT
BFU0426	KF265842	(AG)9	59.97/59.45	50.00/45.00	187	CCGGACAAAGACCAGTCAAT	CAGAGCCAGCCATTTTCTTT
BFU0427	KF265843	(TC)9	60.37/60.05	50.00/40.91	249	CAGCCTTCCTTCTGGTCAAA	TGTTGTTGGTTCTTGGTTCTTG
BFU0428	KF265844	(AT)9	59.01/59.81	38.10/40.00	197	CTTCCTCAATGATCCCAAAAA	AGCTTTTCCAAACCCCATTT
BFU0429	KF265845	(TC)9	59.96/60.34	45.00/40.00	206	TTGGCTGCTCAAGGAATCTT	TTTCACCCAAAAGGCAACAT
BFU0430	KF265846	(CT)9	59.58/59.82	50.00/50.00	278	GGAATTCTGCTCGCTTCACT	ACCATACATGCCCTCGAAAC
BFU0431	KF265847	(AT)9	60.51/58.37	55.00/34.78	238	CCAACCAGACCAGCTAATGG	ACCCACAATCATAGAAACATCAA
BFU0432	KF265848	(TCT)6	60.20/60.21	45.00/50.00	299	CCCAGCAAATAAGCCTTCAA	GCTTTCCTCCACTGCCATTA
BFU0433	KF265849	(TTTTGT)3	59.99/59.90	55.00/40,00	271	TCACTCCTCCACTTGCCTCT	AAACCCATTTTCCCAAAACC
BFU0434	KF265850	(TA)9	58.60/60.24	45.00/45.00	116	TTGCAGCTCACAATTCTCCT	AGCGCAATGGCATCTAAAAC
BFU0435	KF265851	(AGA)6	60.56/60.08	50.00/50.00	196	TTAGGATGAGCCAGGGCATA	GAGATGGTGAGCCAATTCGT
BFU0436	KF265852	(AATAAA)3	60.49/58.22	47.83/42.11	300	CCAACTATACATCCACCCATCTG	CGCATCATTTTGCATGACT
BFU0437	KF265853	(TC)9	59.78/59.42	50.00/38.10	286	TAAGGGGGAATGTTGGAGTG	TTCATCCAAATAATGCGTCCT
BFU0438	KF265854	(TC)9	60.06/61.20	40.00/55.00	300	ATTTTGGCATTGACCCATGT	CCCATTGTAGGGGGAGAAGA
BFU0439	KF265855	(CT)9	59.41/59.94	39.13/40.00	264	TCATCTTTAGCCTTCGAGATGTT	AAAGCCAAACATGCCAATTC
BFU0440	KF265856	(TTCTTT)3	60.64/60.07	50.00/55.00	124	CCCTAATTGGTGCCATGTGT	AGTCGTCATCATGGGAGAGG
BFU0441	KF265857	(AG)9	59.99/59.94	52.63/40.91	296	GCGTAGAGCCACGCAAATA	TCCTCCACCCAATAAAGAGAAA
BFU0442	KF265858	(AAC)6	60.05/59.80	45.00/55.00	197	AAGTGGCAACACAAACCACA	CCTCGATCTGGTTCTGAAGG
BFU0443	KF265859	(ATC)6	60.43/59.94	45.00/40.00	194	TTCTGTCACGCAACCTTTGA	TGTGAAATTCGACCAAACCA
BFU0465	KF265860	(TC)9	60.08/59.91	47.62/45.45	170	TAGAAAGGAGGTGGGAGCATT	TGAACTTGTAGCAAGAGGGACA
BFU0467	KF265861	(TC)9	61.22/58.84	52.38/37.50	222	CCGGACCGAGTGGAGTTATTA	AGAATATGGCATCAACCTATACCA
BFU0469	KF265862	(CT)9	60.06/59.86	42.86/38.10	228	CCTTCTTCTTTTGCCCATTTC	TTTGAAGTGGGTTGGTTTTTG
BFU0471	KF265863	(CA)9	59.99/60.12	57.14/47.62	222	CACATCCACCGAGAGAGAGAG	TGGGCCACTCTATCAAAACAG
BFU0472	KF265864	(TC)9	60.22/60.28	47.62/52.38	280	GACCAAAACCTTGAGGTCCAT	CAGCCCTAATGCCTGTACTGA
BFU0473	KF265865	(AG)9	59.99/60.26	47.62/47.62	277	GTCCTGATGTGGAGTGCATTT	TCTACAAGGACGAATCGTTGC
BFU0474	KF265866	(TC)9	59.32/59.82	42.86/38.10	240	GGGTTGGAAAAAGGAAGTCAT	GATGATCAAAACGGCAATGTT
BFU0475	KF265867	(AG)9	59.64/58.93	38.10/47.62	293	TACCAAAGCATGCACCTTTTT	ACTATTGCATCCACTCCAACC
BFU0476	KF265868	(CT)9	59.96/59.81	42.86/52.38	130	CAGGAGTTTTGGACATTGGAA	CTATTATCCCAGCCCTCCAAC
BFU0477	KF265869	(AG)9	59.35/59.99	33.33/38.10	145	TGAAAGAAAAAGGCGAAAATG	AACCCAAACAAAAACCAAACC
BFU0478	KF265870	(TC)9	59.84/59.46	47.62/42.86	189	AACGCTGAAGATTTCCTCCTC	CCTGAATTCCAACCAAAACAG
BFU0479	KF265871	(TC)9	59.82/59.19	42.86/33.33	206	GAAAACCATTGTTGGAGACCA	TGAACCAAGCAACAAAAATCA
BFU0480	KF265872	(AG)9	59.17/60.44	47.62/52.38	137	TGAAGGACTGACCTTTGGAAC	CACCGTGCCTTCTAAGACAGA
BFU0481	KF265873	(AG)9	60.00/59.69	47.62/57.14	134	TTTGGTTGTGTGGGAGAGAAC	TAGGGGAAGAGAGAGGGACAC
BFU0482	KF265874	(CT)9	60.11/60.27	38.10/38.10	228	TTTGTTGGGGGTGTTGTTTTA	AGAGTAAAGTGGGGGCTGCTA
BFU0483	KF265875	(TC)9	59.81/59.89	38.10/42.86	140	TAAACGCGGATGGAAAATATG	AATGGGGAAGAAGATGAGGAA
BFU0485	KF265876	(TC)9	59.95 /59.96	47.62/57.14	164	TAAGCACGCGTTGTAGCCTAT	GAGGCCCCTTGAGAGTAGAGA
BFU0486	KF265877	(GA)9	59.63/60.05	34.78/52.38	280	TGGGAAGAAGAAGAAAACAAATG	GCCTCAGACAAACTGAACTGC
BFU0489	KF265878	(TG)8	59.82/60.45	50.00/40.91	146	CACTCCCTGACACCCAAAAT	CCTGATTTGGTTCCAGAAAAGA
BFU0490	KF265879	(AG)8	59.85/58.16	50.00/40.00	131	CTTCGGAGGTTCACAAAAGC	CCAAAAAGCATTATGGTTGC
BFU0491	KF265880	(TA)8	60.05/59.64	50.00/47.62	266	TGGTGTGTTGTTGTCCGAGT	CGTTTCGAGGCTAGACAAAGA
BFU0492	KF265881	(AC)8	59.81/59.95	45.00/40.00	276	AGAAAGGCGAATGGAAGTCA	AAAAGGAAAATGGCGGAACT
BFU0493	KF265882	(CT)8	59.58/59.01	45.00/52.38	252	TTATTGTGGCAGCATTACGG	CCAGTAGCTTGAGCCCAATAG
BFU0494	KF265883	(TC)8	59.92/60.49	40.00/40.91	208	TTTTGCCCCAAAAGAATGTC	CCCTTGTTCTTTTCTTGGTTCA
BFU0495	KF265884	(AG)8	60.33/60.62	55.00/52.63	137	AGTCGGGGAAGGAGAGAGAA	CGGTTTTCAAGTGGGCTTC
BFU0496	KF265885	(AG)8	59.78/59.99	40.00/45.00	286	TGGCACATAAAATGCCCATA	CAGCCACATGCAAAAGAGAA
BFU0498	KF265886	(AG)8	60.43/60.43	50.00/50.00	291	CCCACTGCTGCACTTTTCTT	CTTTTGGTGCAGAAGCAGGT
BFU0500	KF265887	(CT)8	58.65/58.49	40.00/34.78	234	TGGAAAACTTGTTTGGTTGC	ACCCAGAAAATGAAATTACAAGG
BFU0501	KF265888	(AG)8	60.02/60.13	50.00/50.00	135	GCCATGCTTGACTTGCTACA	AATGTTCCCATCCTCCCTTC
BFU0502	KF265889	(CT)8	58.14/59.84	30.43/50.00	113	CGGAAATCATCAATCATTTTAGA	TGGAGAACCTGCTCCTTGTT
BFU0503	KF265890	(GA)8	59.48/60.00	45.00/40.00	289	GGTTTTGGGGATAACATGGA	GCAATGTCAAGCAAAGCAAA
BFU0504	KF265891	(TA)8	60.00/59.46	45.00/55.00	285	CCTCGGTAAATTGTGCGTTT	ACTTGGTGAGGTGTGGTGTG
BFU0505	KF265892	(AG)8	60.13/60.59	55.00/45.00	263	CTGCTAACCACCGATGAGGT	CCAATAAACGAAACCCCACA
BFU0506	KF265893	(CT)8	59.99/59.12	50.00/30.43	261	TGTCTTTCCCGCTGTCTTCT	GAACATTGATATTTTTCCCCAAA
BFU0507	KF265894	(GA)8	59.51/60.54	47.83/50.00	199	TGAACCACCCTAAGAGAGAGAGA	CCACATGTCAGCCGTTCATA
BFU0508	KF265895	(GA)8	59.73/59.57	50.00/35.00	249	TAAGCTGGCTACCGGACATT	AAACCGGGAAATTGGTTTTT
BFU0509	KF265896	(AG)8	60.95/60.09	55.00/50.00	206	CCTCCGCTCCCTTGTAATTC	GTTCCTTCCCGAGTTCAACA
BFU0511	KF265897	(TG)8	60.05/59.88	36.36/47.62	157	GCAGTTTTGGAAACAAAACACA	CCATGCATGCTGTACAAGAGA
BFU0512	KF265898	(AT)8	59.25/59.92	54.55/45.00	192	CCCTGTTCTCTTCTACCCACTC	CATCTTGTGCAATTGGGATG
BFU0513	KF265899	(CT)8	59.73/59.84	45.00/50.00	124	CACACAAAAGTTCCCTGCAA	TTGAAGCTGTGGAAGGAGGT
BFU0514	KF265900	(AG)8	60.39/59.79	50.00/47.62	187	CGACAACCCTGTTTTTCCAC	TCAATCCTCTTCTCCCACTCA
BFU0515	KF265901	(AG)8	59.99/59.22	45.00/50.00	221	AGTCTGCTTTCCAGCCAAAA	GGAAGCAGCTGTGCTAACAA
BFU0517	KF265902	(TG)8	59.82/58.60	50.00/34.78	141	CACTCCCTGACACCCAAAAT	GGGTTCCAGAAAAGAAATACAAA
BFU0518	KF265903	(GA)8	60.14/59.55	45.0/55.00	257	AAACGCCAAATCGTAAGTGC	CACCCTCAGGTCTTTTGTCC
BFU0520	KF265904	(TA)8	60.69/60.07	50.00/45.00	265	AATGAGCCAGTGATGCTGGT	CGTCCATTGCCTTCAAATCT
BFU0521	KF265905	(TC)8	60.07/60.03	45.00/45.00	245	CCTTTACTCGGCATTTCCAA	TGGTGAAGCAGCAAAAACAG
BFU0523	KF265906	(CT)8	60.84/61.10	55.00/45.00	245	GCCTTCCCTGCCTCTCTTTA	GCGCGAATCACCTTTTCATA
BFU0525	KF265907	(GA)8	60.24/60.27	50.00/50.00	298	AGCGATTCCAGGTATTGCAG	ATGAAAGGATCCTCCGAACC
BFU0526	KF265908	(AG)8	60.21/60.25	50.00/45.00	110	GCGGAGGAGACGACATTTTA	CTCCATTTGCGTTTCGTTCT
BFU0528	KF265909	(TC)8	58.69/60.52	34.78/50.00	244	TTTGTGAGGTATAATGGCTTTCA	GCCTCTGTTGAAGCAAGGAA
BFU0529	KF265910	(CT)8	61.05/59.51	50.00/45.00	144	GTGAACAGGGCATTCAAGGA	GAATTCCAAGAAACGGATGC
BFU0530	KF265911	(AG)8	59.81/59.25	45.00/50.00	205	AAGAGCCTTCAACCGAATCA	CTTTCTTCCCTCCCACTGAA
BFU0531	KF265912	(AG)8	60.05/60.14	47.62/55.00	127	CGGGATATTTCTGAAGGAAGC	ACCCTGTGCGAAGAGAGAGA
BFU0532	KF265913	(TC)8	61.37/59.96	57.89/55.00	181	GATGTCGCCATGGCTCTCT	AACCCTTCGGCTCTTCTCTC
BFU0533	KF265914	(AG)8	59.46/59.88	55.00/31.82	276	GCCCGTGTCTGCTAGAGAAT	AAACGAAAGAAACCATTTGCAT
BFU0534	KF265915	(CT)8	60.03/60.20	55.00/45.00	106	CTTACAACACCCCCTGTGCT	TTGAAGATGGAGCCATGACA
BFU0535	KF265916	(AT)8	60.16/60.57	55.00/50.00	236	ATCCGCTAACACACGCCTAC	CCATGGGACCCTAACAATGA
BFU0536	KF265917	(TC)8	59.36/59.59	55.00/45.00	266	CGACGTCGTCTTGTAGGTTG	GGTGACAAAACGTCACGAAA
BFU0537	KF265918	(AG)8	60.07/59.34	50.00/40.00	218	CTGACAGCCCATCCCTAAAA	TGCAGTAAAAACTGCCCAAA
BFU0538	KF265919	(TC)8	60.05/59.65	50.00/55.00	198	GGGACGGAGACAATCTCAAA	CAGGGAATTGGTGGAGAGAG
BFU0539	KF265920	(TC)8	59.85/60.01	38.10/55.00	221	CCGGAAACGTTTAAAATGACA	GGAGGAAGAAGGATCCAAGG
BFU0540	KF265921	(GT)8	59.91/59.95	50.00/50.00	180	AGCACACGTGCAGTCAAATC	GCAGTTGCGACAGTGTTGTT
BFU0541	KF265922	(GA)8	59.94/59.94	45.00/45.00	161	TGGTTTTCAGAGGGTTTTGG	TTCAAACGCTACCCATTTCC
BFU0543	KF265923	(AC)8	59.89/59.98	50.00/52.38	299	GGAGCATCAGGATCAACCAT	TGGTGGTGACGATCTTAGGAC
BFU0544	KF265924	(AG)8	58.71/60.07	34.78/50.00	101	TCAAACACTTTTGTCCACTTGTT	CCTTCCTGGCTTCCACATAA
BFU0545	KF265925	(AG)8	59.99/60.12	55.00/45.00	205	CGAAAAGCCAGGTCACTCTC	AAAGGATGGCAAAACAGTGC
BFU0546	KF265926	(CT)8	59.30/58.50	45.00/31.82	156	CGTGACAGCACAATGTTTGA	AAACCATGAAATATCCAAGCAA
BFU0547	KF265927	(AG)8	59.82/59.82	40.00/50.00	114	TTTGCAATGCGTTGATTCTC	GCGCTTTATCTCCTCCCTTT
BFU0548	KF265928	(CT)7	59.82/60.45	50.00/40.91	146	CACTCCCTGACACCCAAAAT	CCTGATTTGGTTCCAGAAAAGA
BFU0549	KF265929	(TA)7	60.05/59.64	50.00/47.62	266	TGGTGTGTTGTTGTCCGAGT	CGTTTCGAGGCTAGACAAAGA
BFU0550	KF265930	(CT)7	58.83/59.82	50.00/50.00	235	CCAGATGTGTCTCGATGCTT	TGCTCCATGCTTCTGGTATG
BFU0551	KF265931	(CT)7	60.00/59.88	50.00/50.00	196	GCGACCTCACTTCTTTTTGC	AAGGACCCTTACAAGCAGCA
BFU0553	KF265932	(GA)7	60.14/58.69	45.00/45.00	181	AAACGCCAAATCGTAAGTGC	GATTGTCCCCTCCACAATTT
BFU0554	KF265933	(TC)7	60.69/59.96	45.00/47.62	222	CAATCTTGCCCCCACATTTA	GACAATGAGGGTTTGAGTGGA
BFU0555	KF265934	(TC)7	60.44/59.71	55.00/45.00	284	CCAGCTGTCTCGGAACTTGT	AGCAAAACCCTCTGTTTCCA
BFU0556	KF265935	(TC)7	58.68/59.94	50.00/45.00	130	GAACAAGCAGAGTACTGCCCTA	CAAAGTGTTTCCCTCCCAAA
BFU0557	KF265936	(GA)7	60.05/60.25	40.91/45.00	276	TGTTGTTGGTTCTTGGTTCTTG	TGCTCAATATGGCAGCATGT
BFU0558	KF265937	(AT)7	59.83/60.04	52.38/50.00	235	AAGGAGCAGGTTCTCCATCTC	AGTGGAGCTTTGCGCTACAT
BFU0559	KF265938	(GA)7	59.94/59.99	45.00/55.00	295	AAGCCCCAAATCTCCAAACT	CCGTGGACGTAGATCACCTT
BFU0560	KF265939	(TC)7	60.18/59.94	50.00/55.00	234	CCTCGATAATGGGTGTTTGG	CGGAACCATTCGAGAGAGAG
BFU0561	KF265940	(CT)7	58.83/59.82	50.00/50.00	235	CCAGATGTGTCTCGATGCTT	TGCTCCATGCTTCTGGTATG
BFU0562	KF265941	(GA)7	59.96/60.35	45.00/45.00	223	CATGCATGTTGTGGAAAAGG	GGCATACATGCATTTGGTCA
BFU0563	KF265942	(AG)7	60.95/60.09	55.00/50.00	206	CCTCCGCTCCCTTGTAATTC	GTTCCTTCCCGAGTTCAACA
BFU0564	KF265943	(TC)7	59.51/59.93	40.00/50.00	109	CTTTTCAAGCACCGCTTTTT	GACTATTGGCAACCCTCCAA
BFU0567	KF265944	(AG)7	59.28/60.43	47.62/40.00	255	GCCGAATGGTTATGAGAGAGA	TTTCATTGCCCCGTCTTAAA
BFU0568	KF265945	(TG)7	60.05/59.88	36.36/47.62	157	GCAGTTTTGGAAACAAAACACA	CCATGCATGCTGTACAAGAGA
BFU0569	KF265946	(AC)7	59.80/60.20	45.00/50.00	274	GCCCCATTTTGAACTCACAT	TGATGTTGTCCGGTCCCTAT
BFU0570	KF265947	(TC)7	59.84/60.07	50.00/50.00	141	CTGTAGATCGGCCGAAAAAG	CCAGCTTCTGATTGGTCCAT
BFU0571	KF265948	(CT)7	58.75/59.32	45.00/40.00	184	CCGTTTTCACTTCCTGTTGA	AACCCCCATAAGCAAAAACA
BFU0572	KF265949	(TC)7	59.93/59.84	50.00/55.00	227	TGATACAGCCCCCAAAGAAC	GCCAGGCTCAAGGAATACTG
BFU0573	KF265950	(CT)7	60.26/59.94	57.89/55.00	188	AGTAACTCGGCCGGAACAG	ACACCACGTGTCAGCTTCTG
BFU0574	KF265951	(CA)7	58.75/59.92	47.83/42.86	114	GAAGGTTGAAGATGCTCTCTCTC	CCTGACATCCATTTGAAGGAA
BFU0575	KF265952	(CT)7	60.40/59.99	45.00/45.00	176	TTCGCAACAATGACCAGCTA	CTTCCTGCGTTTTCTTTTCG
BFU0576	KF265953	(AG)7	59.94/60.06	55.00/50.00	240	TCTCCCATGGCTCTGAGACT	GACCAAAAACACACGCACAC
BFU0577	KF265954	(CT)7	60.07/59.83	50.00/45.00	263	TTAACGAAGCTCCCACCATC	CGAACCGAACCGGTTTAATA
BFU0579	KF265955	(TC)7	59.99/59.42	50.00/40.00	145	AGCACACTACCCGAAAATGG	GCCAAAAACACAAACCATGA
BFU0580	KF265956	(TC)7	58.99/60.01	40.00/55.00	215	CGACCGGAAACGTTTAAAAT	GGGAGGAAGAAGGATCCAAG
BFU0581	KF265957	(CA)7	58.67/59.92	45.45/42.86	117	TGAGAAGGTTGAAGATGCTCTC	CCTGACATCCATTTGAAGGAA
BFU0582	KF265958	(TC)7	60.01/59.84	50.00/50.00	220	TGAAGCCGTCACTGCTAATG	TTGAAGCTGTGGAAGGAGGT
BFU0583	KF265959	(TC)7	59.14/59.97	45.45 /50.00	154	TGAACCTACCAAGGTGTTTCTG	GCGATGATGTTCACCACAAC
BFU0584	KF265960	(CT)7	59.73/59.95	52.63/55.00	290	AGGTCGATTTCCCCATCAC	GCTGAGAGAGAATCCCAACG
BFU0586	KF265961	(TC)7	60.13/60.13	55.00/45.00	252	CGAACTTGGAGAGCTTGGAG	TTGAGCTCTGCAACGAAATG
BFU0588	KF265962	(CT)7	60.31/60.77	40.00/50.00	139	GCAAACCATTTTGGCATTTC	GGTGTGACGCACAAACAGAA
BFU0589	KF265963	(CT)7	59.62/59.99	50.00/50.00	240	AACGTTCACCGCCAGTCTAT	GAGAAAGAAAGCGTCGGTTG
BFU0591	KF265964	(GA)7	59.77/60.04	38.10/50.00	219	TCAATGGGATTGACAACATGA	TTTGTCCCTTGGAGGATGAG
BFU0592	KF265965	(TC)7	59.94/59.86	55.00/57.14	275	TGGAACTAGCAGGAGGAGGA	AGGGAGAGAGAGAGTGGGTTG
BFU0593	KF265966	(AG)7	59.83/60.94	34.78/55.00	262	TGAGATTATTTGGGTTTGAAGGA	GAGCAGTGGCCATCAAAGAG
BFU0595	KF265967	(GA)7	58.62/60.00	38.10/55.00	109	GGCCATGCAAAACTTTAAATC	GAGCCAAACCTCTTCTGCAC
BFU0599	KF265968	(CT)7	58.98/59.99	47.62/39.13	276	GCTTGTCTTCTTTTCCCCTCT	TGGAACTTAGAAAATGTGGAGGA
BFU0600	KF265969	(TC)7	60.10/59.80	40.00/50.00	219	TTTGTTGGGGGTGTTGTTTT	TGGGGGCTGCTAGAAGAATA
BFU0601	KF265970	(TC)7	61.95/59.80	60.00/47.83	185	GGACGGCTCCGATTGTCTAC	GGTCAAGAGGTACAATAGCGAGA
BFU0602	KF265971	(AG)7	59.91/59.95	50.00/50.00	180	AGCACACGTGCAGTCAAATC	GCAGTTGCGACAGTGTTGTT
BFU0603	KF265972	(AG)7	59.81/59.67	45.00/50.00	201	ATTGTGGCGTCATCACCATA	CGAAATGGTCGGTCTTTCTC
BFU0604	KF265973	(AT)7	59.98/59.52	50.00 /45.00	260	TTCTCTCGCTCGCTTTTCTC	TCGGGATTTAAAACGAAGGA
BFU0605	KF265974	(TC)7	60.20/60.42	45.00/40.00	273	CAGCCGAATCCTTCGTTTTA	TTTCAGATTTCCGGTTCCAA
BFU0606	KF265975	(GT)7	59.94/59.31	50.00/45.00	133	TTTGCTCTCTCTGTCTCTGTGC	CGCTCCCTTCATTTCAGTTT
BFU0607	KF265976	(AG)7	59.98/60.11	50.00/45.00	202	ATATTGTTGGCTGGCTACGG	TAGAACCACGTGCCAAATCA
BFU0608	KF265977	(TC)7	59.99/59.77	60.00/55.00	286	GTGGCAGAGAGACCCAGAAG	GGAGTCGAATCCTGCTCATC
BFU0609	KF265978	(GT)7	60.67/59.39	40.00/50.00	211	AAATGCCGAAATATGCATGG	CCCGAGATTTCTCTCATGCT
BFU0611	KF265979	(AG)6	60.86/58.92	50.00/45.00	124	AGATTGCACAACTGCCTCGT	GCTCATCTAAAACCGCAACA
BFU0612	KF265980	(AG)6	59.13/59.56	40.91/34.78	200	CGTGGGACAAACAAATAAGAGA	CAGAAGAAAAAGCGAAATGAAAG
BFU0613	KF265981	(TC)6	59.92/60.49	40.00/40.91	208	TTTTGCCCCAAAAGAATGTC	CCCTTGTTCTTTTCTTGGTTCA
BFU0614	KF265982	(CT)6	60.04/59.79	50.00/55.00	256	GATCGGTCCGAGACGATAAA	ATACGCTCACGCCCTAGTGT
BFU0615	KF265983	(AG)6	58.28/60.51	38.10/47.37	292	TGCAGTGTTTTCCCAATAGAA	CGGTTGGCGTTTACAATCA
BFU0616	KF265984	(CT)6	59.41/60.07	50.00/45.00	294	TATGTCGGGTTTGTGTCCTG	TTTGGAAACATTCCGCTAGG
BFU0617	KF265985	(CT)6	59.88/60.37	55.00/45.00	137	CCTACTGGTTTGGCTTCTGC	TTTATTGGTGGAAGGCGTGT
BFU0619	KF265986	(AG)6	59.96/60.01	55.00/39.13	250	ATCCAACAGACTCCCCAGTG	CCCTTTGAACCAATTTTAGCTCT
BFU0620	KF265987	(AG)6	59.81/60.05	50.00/40.91	147	TGCTGGGAAAGGGAAGACTA	CACCAAAGACTTGGACACAAAA
BFU0621	KF265988	(CT)6	60.18/60.72	50.00/45.00	242	CCTCGATAATGGGTGTTTGG	ATGATCAACGGAACCATTCG
BFU0622	KF265989	(AG)6	59.55/59.95	50.00/45.00	234	TCTGCACTCTCCCAAGTCAA	TCGACCCTTTTGTGTTTTCC
BFU0623	KF265990	(TC)6	59.74/58.81	55.00/43.48	152	GGAGATGGTAGGTGGGATGA	GGTAAGAGGAGAGAAAACCACAA
BFU0624	KF265991	(AG)6	59.78/58.80	45.00/42.11	113	TGAAAAACTCTCGGGGAAGA	CCGGAAAACATGAAAATGG
BFU0626	KF265992	(AT)6	60.17/59.50	47.37/45.00	155	CTTTGGGCTGGGAGAAAAA	AGTCCAACATTACGCGGTTT
BFU0627	KF265993	(AG)6	59.81/58.90		282	AGAATTTCCACATGCTTTCACA	TTCTTCGTTCACGAATCAAATAC
BFU0628	KF265994	(AG)6	59.82/59.56	50.00/40.00	166	GGTGAGAAATTTGCCTCTGC	TATTTTTGCGGACACGAATG
BFU0629	KF265995	(AG)6	59.57/59.97	36.36/52.38	231	TGCATGCAGATAATGGAATCTT	TCTCCTCTCCCACTCTCACAA
BFU0630	KF265996	(AT)6	60.16/60.04	60.00/45.00	249	ACACGTCTGAGAGGGTCCAC	AGCATTTCCCTTCGATGATG
BFU0632	KF265997	(TC)6	60.02/59.78	45.00/50.00	224	GCGCAATGAAGCTTACACAA	TCTGGGATAACCCAACAAGG
BFU0633	KF265998	(CT)6	60.07/61.24	45.00/55.00	156	CTAGGCCGGAAAAATGTGAA	CACGTGGCATGAACAGTGTC
BFU0635	KF265999	(CT)6	60.51/58.49	55.00/40.91	109	ATGCACACCCACACTCACAC	TCTAGGGGACCAATGTTGTAAA
BFU0636	KF266000	(TA)6	59.88/58.03	40.00/47.62	200	GGGATTGGAAATTGCTTGAA	CATGATATAGAGGGGCAACCT
BFU0637	KF266001	(CT)6	60.41/59.23	55.00/45.00	139	ACCCAACCCCACACACATAC	TTGGTCTCTCGATGGCAATA
BFU0638	KF266002	(GA)6	59.72/60.18	50.00/55.00	172	GGCTCTTCTTGCTCTGCAAT	TGTCTCGTCGTCTCTGTTCG
BFU0639	KF266003	(TG)6	59.58/60.07	50.00/50.00	199	TGCTGCTGAGTTGTCATCCT	TAAATCCAAGAGCCCACCAG
BFU0640	KF266004	(TC)6	60.15/59.93	45.00/45.00	194	CCATTTTTGATCGCATACCC	AAATCGACTGGGTGAAATCG
BFU0641	KF266005	(CT)6	59.96/60.13	55.00/45.00	218	CGGCGCGTGTACAGTAACTA	TTGGGTCGTGAACAGTGAAA
BFU0642	KF266006	(AC)6	59.78/59.74	30.43/38.10	218	TTTGATGTTTCACAAGGGTTTTT	AAACTTTTTCATGCGTCCTCA
BFU0643	KF266007	(TC)6	59.29/59.52	40.00/50.00	176	TTTTGGGTCCCCTTACAAAA	CAACAGTCAACCCCAGATGA
BFU0644	KF266008	(TC)6	60.53/59.78	45.00/50.00	228	AAAAGCGCAATGAAGCTCAC	TCTGGGATAACCCAACAAGG
BFU0645	KF266009	(TC)6	60.15/59.93	45.00/45.00	194	CCATTTTTGATCGCATACCC	AAATCGACTGGGTGAAATCG
BFU0646	KF266010	(GA)6	59.25/60.66	40.00/55.00	168	TCCTTCAAATGGCAGACAAA	CACTTCATTCCCTGCCTGTC
BFU0648	KF266011	(AG)6	59.69/59.94	60.00/45.00	182	GAGACCGAAGTGAGGACACC	ACCCATGCTCCCTTTTCTTT
BFU0651	KF266012	(AG)6	59.23/60.43	50.00/55.00	224	CCACATCTGTTGTCTCTGTGTG	GCCGTTCACGTGCTCTCTAT
BFU0652	KF266013	(GA)6	60.04/60.21	45.00/45.00	178	ATCACGGGAATATGGTGCAT	GACGCCAATAAAGGAAGCAA
BFU0653	KF266014	(CT)6	59.95/59.95	47.62/55.00	225	TTTCCAAGAGCCTTTCTCTCC	GCTGAGAGAGAATCCCAACG
BFU0654	KF266015	(TC)6	59.97/59.88	50.00/36.36	255	AAGTCATGCCCACAAAGACC	CAACCTCAATTCCAACAAACAA
BFU0656	KF266016	(TA)6	58.89/60.21	45.45/50.00	235	CCAATTCAGCATCATCTCTCTC	GGGGAAAACATGACACAAGG
BFU0657	KF266017	(AG)6	59.16/59.54	55.00/50.00	207	GCAGAAGGAGGAAGAAGACG	ATTCATGTGGGCTCCACTCT
BFU0658	KF266018	(CA)6	59.90/59.86	50.00/38.10	239	TCGGATAACCCCCTTCTTCT	TTTGAAGTGGGTTGGTTTTTG
BFU0659	KF266019	(CT)6	60.10/59.10	45.00/45.00	118	GCTGCCAGCCAATTAAACAT	AACCCATCATCCCCAACTAA
BFU0660	KF266020	(CT)6	59.98/58.99	55.00/43.48	104	CTGGCTTCGGCTTCAGATAC	GAAAAGGACCTCTAAAAGGAAGC
BFU0661	KF266021	(CT)6	60.32/60.09	45.45/50.00	124	CGCGTATGAGTAAACAGACGAA	CCCGCCTTTTATAGTCGTCA
BFU0664	KF266022	(AG)6	59.01/58.64	42.86/45.00	226	CTTGCTCGAACTTCAAAAACC	TCATCCATTTCTCGTCAAGG
BFU0665	KF266023	(CA)6	59.87/59.98	50.00/50.00	133	GCTACGTGCTCACCAATTCA	TTCTGCCGAGTGATGTTCTG
BFU0666	KF266024	(AG)6	61.06/59.60	50.00/31.82	254	TGCCCAACTTGGTTACAAGC	TTGCTTTTCGTTTTATGATGGA
BFU0667	KF266025	(AG)6	60.74/58.45	52.38/43.48	103	CCACCAAGAGAAAGAGGGAGA	GATATACCATAACCACCCAAACC
BFU0668	KF266026	(AG)6	59.94/59.94	45.00/45.00	161	TGGTTTTCAGAGGGTTTTGG	TTCAAACGCTACCCATTTCC
BFU0669	KF266027	(GA)6	60.54/59.46	50.00/52.38	155	GCATGTCATGTGGAGTTGGA	CACTAGGGGACCCTCCTAAAA
BFU0671	KF266028	(GA)6	58.71/60.07	34.78/50.00	101	TCAAACACTTTTGTCCACTTGTT	CCTTCCTGGCTTCCACATAA
BFU0673	KF266029	(TTA)6	60.07/59.97	38.10/47.62	298	GATGCGGAAAATTCACAAAGA	GCACACTGGAGCCCATATAAA
BFU0674	KF266030	(AGA)6	60.06/60.00	42.86/47.62	143	CTGGTTTGTTTGTTTGGCTGT	CTCTTCCTTCCTGCGTTTTCT
BFU0676	KF266031	(TTA)6	59.84/60.45	47.62/42.86	248	GAAATCGCCTCTGAGTTTCCT	TTTCCATGTCCTTGGATCAGA
BFU0677	KF266032	(AAT)6	59.88/60.25	42.86/52.38	263	TCAAAATGGAGATGGAGATGG	CTGGAATCGGGTACCTACGTT
BFU0678	KF266033	(TTA)6	59.94/60.45	47.62/42.86	253	TATAGGAAATCGCCCCTGAGT	TTTCCATGTCCTTGGATCAGA
BFU0679	KF266034	(TTA)6	60.10/59.31	47.62/42.86	134	GGGGAATAGTGACGGTGTTTT	CATTACCGGTCACAACAATCA
BFU0680	KF266035	(CTCTGT)3	60.19/60.07	52.38/52.38	213	CCATACCTGGGGGAAGTAGAA	GACTCACCGGGAAGAGAAATC
BFU0681	KF266036	(TTCTTT)3	59.17/59.99	42.86/38.10	268	TATCCCTAATTGGTGCCATGT	ACGTGAAATTTTGCCATCAAG
BFU0682	KF266037	(GTCTCT)3	60.04/60.30	57.14/47.62	110	CTCTCCTCTGGCTCACAACAC	GGGTTTTGGTGAAACTGTGTG
BFU0683	KF266038	(AGAGAC)3	60.06/59.96	47.62/55.00	195	CCTGTGGTTTTTGTCGAGTGT	GAAAGGCGGGTTCTCTCTCT
BFU0684	KF266039	(TTTTTG)3	60.05/59.98	40.91/47.62	285	TGTGTTTTGTCTGGTTTTGAGG	CAGACGGATGAGGTTGGTTTA
BFU0685	KF266040	(CCTCTG)3	59.92/59.93	52.38/47.62	206	AGAACACAACCCCACACAGAC	AACCCATCATCCCCAACTAAC
BFU0686	KF266041	(TTCTTT)3	60.09/59.93	42.86/38.10	222	TCGTGGAATTTTATCGCAGAC	GGATTTTGATTCGAACGTCAA
BFU0689	KF266042	(GCA)5	59.57/58.99	45.00/40.00	102	ATCATGAAGCAACACCAACG	TTTCAACAGCTGCAATCACA
BFU0690	KF266043	(AAT)5	59.96/60.03	47.62/57.14	294	TCCACTCAAACCCTCATTGTC	CATGTGCTCTCTCCACCTAGC
BFU0691	KF266044	(TCT)5	59.91/59.00	45.00/42.86	252	AATGGGAATACCACCACCAA	AAAGTTGACAAGCTGCTCCAT
BFU0692	KF266045	(GCA)5	59.57/58.99	45.00/40.00	102	ATCATGAAGCAACACCAACG	TTTCAACAGCTGCAATCACA
BFU0693	KF266046	(TCT)5	60.00/60.17	45.00/55.00	208	CGACACCGTTTTTGGCTAAT	AACGACCTACGTCCTCGTTG
BFU0694	KF266047	(ATT)5	60.41/59.23	55.00/45.00	139	ACCCAACCCCACACACATAC	TTGGTCTCTCGATGGCAATA
BFU0696	KF266048	(CCA)5	60.38/60.07	50.00/50.00	200	TCCCCTTCATTTTCCTCCTC	CTGCTCCCAAGGAATACCAA
BFU0697	KF266049	(TTC)5	59.64/58.88	50.00/36.36	251	GCACATGCTTAGCAAACGAG	TTCATTCCCTTGTAGCTTGAAA
BFU0698	KF266050	(GAA)5	59.73/60.05	50.00/40.00	119	GAGCAACCACAGTGGAAACA	CCCTTTGCTTCAATTCCAAA
BFU0699	KF266051	(TGG)5	60.10/59.62	50.00/50.00	200	ATGTTATTGCCCTCCTGCTG	ATAGCCGTGCGTCCTTGTAT
BFU0700	KF266052	(CTT)5	60.10/59.75	55.00/40.00	203	GACGCCCTCATGACGACTAT	GCGACGTTTTGTGTTTTTGA
BFU0701	KF266053	(TTA)5	59.96/59.83	50.00/55.00	141	CCAAATCTAGGGACGCACAT	TCCTTCAGTCCCTCTCGTGT
BFU0702	KF266054	(TCA)5	59.93/59.94	50.00/55.00	163	AGCACGCGTTGTAGCCTATT	TGAGGCCCCTTGAGAGTAGA
BFU0703	KF266055	(AAG)5	59.29/59.37	42.86/39.13	235	CATGTGCAGCAAGATTTCATC	TGTCGGGATAGGATTTAATTCAG
BFU0704	KF266056	(GAA)5	59.98/59.52	50.00/40.00	260	TTCTCTCGCTCGCTTTTCTC	TCGGGATTTAAAACGAAGGA
BFU0705	KF266057	(AAT)5	59.99/59.99	40.00/55.00	263	TGAATTAGGCTTTGCGCTTT	GAGAGTGACCTGGCTTTTCG
BFU0706	KF266058	(AAAT)4	59.99/60.02	50.00/55.00	220	GGACATGCACAGAAGAAGCA	GCGAGGCTACAGTGACATGA
BFU0707	KF266059	(ATTT)4	59.96/60.35	45.00/45.00	223	CATGCATGTTGTGGAAAAGG	GGCATACATGCATTTGGTCA
BFU0708	KF266060	(AAAC)4	59.60/59.84	47.62/50.00	194	CCCTTTTCCAATAACGTACCC	TGCTTCTCCTTGGTGGCTAT
BFU0709	KF266061	(AAAT)4	60.03/59.29	40.91/40.00	250	CCTACATGAAAAAGCACCACAA	ATTTTTCCAACAGCCCATGT
BFU0710	KF266062	(TTTA)4	60.28/59.96	55.00/30.43	177	GGCCCAACCTAAACACACAC	TTGGCTCATCCAAGAATTAAAAA
BFU0711	KF266063	(AAAT)4	60.22/59.00	40.00/47.62	117	TTTCTGCAAAACGGGAAAAG	TGTGTGTGTGTGTGTGTGTGA
BFU0712	KF266064	(TCTT)4	59.80/60.28	50.00/60.00	217	TCTCACGGACCTCGATCTTT	CAGAGTTGGCGAGGAGAGAG
BFU0713	KF266065	(TTTA)4	60.05/60.27	55.00/50.00	197	GTCAGTCGGTGGTTGTTGTG	CTCAGCGGTAATTGGTGCTT
BFU0714	KF266066	(AAAT)4	60.11/60.14	50.00/50.00	115	GGTGCGTGAAAGTCCCTTTA	CGCATGTGGACAAATGTAGC
BFU0715	KF266067	(TCTT)4	58.77/59.84	39.13/50.00	113	TCAATATCCCACCTACCTCATTT	AACCTCCTTCCACAGCTTCA
BFU0716	KF266068	(AAGA)4	59.84/59.78	50.00/50.00	109	AACCTCCTTCCACAGCTTCA	TATCCCACCTACCGCATTTC
BFU0717	KF266069	(ATAA)4	59.18/60.04	45.00/50.00	287	AATCCAAAGCCGATAAGACG	TGCCTCTCCGTATCCAAATC
BFU0718	KF266070	(TTTC)4	59.83/59.71	50.00/40.00	165	TTCATGGACTTGCAGGTGAG	CACAATTTCGCCAAGTCAAA
BFU0719	KF266071	(AAAT)4	59.77/59.90	52.63/50.00	235	ATGTCCTTTCCCGGACAAC	GACTTTGGATTGGACCAGGA
BFU0720	KF266072	(AACC)4	59.87/60.07	40.00/50.00	278	TCGAATCAAAATCCCCTTTG	GTGTCCGGAAGCAGGAATTA
BFU0721	KF266073	(ATTT)4	60.26/59.89	45.00/45.00	192	TGGTAGGCTTGTTTGCATGA	TCAAGGGGATGATGTGTCAA
BFU0722	KF266074	(AAAC)4	59.60/59.84	47.62/50.00	194	CCCTTTTCCAATAACGTACCC	TGCTTCTCCTTGGTGGCTAT
BFU0723	KF266075	(AAAAT)3	60.17/60.15	47.37/50.00	146	CTTTGGGCTGGGAGAAAAA	TTACGCGGTTTACCGTTAGC
BFU0724	KF266076	(AATCT)3	60.34/59.95	55.00/60.00	137	GCGAGTGAGTGAAGCAGTGA	GAGAGAGAGTGGGGGAGCTT
BFU0725	KF266077	(CTCTG)3	59.99/59.53	50.00/50.00	208	TCCACTCGTTTCCTCTGCTT	GAACATGACGAGAACCACCA
BFU0726	KF266078	(AACAA)3	60.16/59.98	45.00/50.00	250	ACCCTTCCCCAATTCAAAAG	TAGCGGGTATGGCATGTGTA
BFU0727	KF266079	(AAAG)3	60.09/60.11	50.00/45.00	149	ACCCTCCCATACACACCAAA	CATCGTTTGCTTTGGAACCT
BFU0728	KF266080	(AAAT)3	59.78/59.99	40.00/45.00	286	TGGCACATAAAATGCCCATA	CAGCCACATGCAAAAGAGAA
BFU0729	KF266081	(AATA)3	59.91/59.66	35.00/50.00	287	TTTGCCAAAAATGATGTCCA	TACGAAGGGAAGGAGGTGAA
BFU0730	KF266082	(AGAC)3	59.89/60.19	40.00/45.00	288	CACAAAACCAAAGCAAAGCA	GATCCGAACGAGAAAACGAA
BFU0731	KF266083	(TTTA)3	59.90/60.12	50.00/45.00	261	CTGCTTTACAGCCCACACAA	AGGAACAAAACCATGCAAGC
BFU0732	KF266084	(CT)9	59.91/59.91	47.62/47.62	222	AGGTAGTTTGGCTTGGTTGGT	GTTGTTCGTTCTTGGCTCTTG
BFU0733	KF266085	(CT)9	59.67/59.99	38.10/47.62	287	TCCTTTTGCCGAGAATATGAA	GTGAAGCCCCTAATTGTGTCA
BFU0735	KF266086	(TC)9	59.70/59.73	47.62/42.86	284	CGGCTTCCCATTATCTTCTCT	CCAATTGAAAGAAACGACGAG
BFU0736	KF266087	(TA)9	59.72/60.03	39.13/40.91	291	AAAACATAGAAGGTTGCTGTTGC	TGTTCACAGAGAAAAAGCCTCA
BFU0737	KF266088	(TC)9	59.85/59.98	47.62/47.62	218	TCCCAACCTCAAACCTTACCT	TCCTTAACAACTGGTGGATCG
BFU0738	KF266089	(TC)9	60.95/60.04	42.86/52.38	298	AGCGCAATGAAGCTTACACAA	AACACACCTGGTATGCTCTGG
BFU0739	KF266090	(AT)9	60.25/59.18	47.62/42.86	177	CTTACAGCATCGCTGATCCAT	TGGGTGTTCTTGTATGCTGAA
BFU0740	KF266091	(AT)9	60.47/59.99	52.38/47.62	189	CCCTGCAGGATTGTCTAGGAT	GACCTGTGAACCCATTTGCTA
BFU0741	KF266092	(TC)9	59.97/59.30	47.62/52.38	110	ACCCCACCCATTTTTCTACAC	GGGTGAGGTTGAGATCTAGCA
BFU0742	KF266093	(TA)9	60.19/60.03	38.10/42.86	280	CCCAAGTTTAAATGCGGAAAT	AAATTGGGCACCATCTAATCC
BFU0743	KF266094	(GA)9	59.81/59.97	40.91/38.10	133	GGAGGATGAATTGAAAAAGGTG	TTTGCTCGCTTTTCTTATGGA
BFU0744	KF266095	(GA)9	60.00/59.68	47.62/42.86	241	TGGTGTTTGACAAAGGACCTC	AGATTGTCCCCTCCACAATTT
BFU0745	KF266096	(TC)9	59.69/59.82	42.86/38.10	150	ACATCCTTGATCTTCCTGCAA	CCATGGCAAAATAAGAAACCA
BFU0746	KF266097	(TC)9	60.08/60.13	42.86/47.62	181	GTTTTGGGTCCCCTTACAAAA	CTTTCAACAGTCAACCCCAGA
BFU0747	KF266098	(TC)9	59.03/60.04	42.86/52.38	205	TTGGGCTCATTTGATAAGGTC	AACACACCTGGTATGCTCTGG
BFU0748	KF266099	(GA)9	59.85/60.06	52.38/38.10	180	GCCATGGCTGATTACAGAGAG	CAAAATTAATCGACCCCGTTT
BFU0749	KF266100	(CT)9	59.97/59.75	38.10/47.62	215	GACCTGCAAAACCAAAATTCA	GGTTTGAGCTGCTGAGAAAGA
BFU0750	KF266101	(AG)9	59.95/59.92	42.86/42.86	134	TGGAAAATGGGCTGTAAGATG	TGGAATGGACGAGAATGTTTC
BFU0752	KF266102	(CT)9	59.70/60.73	47.62/45.45	193	GGCTTTCTCACCCTCTCATTT	CCGAGGAAGACAATCTTCTCAA
BFU0753	KF266103	(TG)7(TA)10	58.4/58.1	34.8/37.5	324	ATTTGAAACTTACCATCCATCGA	CTCAACCCATATTATCAATCTCCA
BFU0754	KF266104	(AG)19	58.3/60.4	37.5/45.8	333	GCACTCTGTTTATTCAATTCTTGC	CACGGAAGCAGACTATACACCATT
BFU0755	KF266105	(TG)16	59.2/59.5	40.9/50	222	TGGAAAATGTAATGGGGAGATG	GCAGCCTTCCCATTCATTTC
BFU0756	KF266106	(TG)7	60.1/59.5	47.6/47.8	274	CGTGACCCCAAAACTGAAGAA	AGAATCTCCTGCTCAGATCCAAG
BFU0759	KF266107	(AC)7	60/60.9	52.4/61.1	280	AGTGTCTGTTTGGCGAAGGTG	GGAAATGGACGGACGGGA
BFU0760	KF266108	(AC)9	59.2/59.5	41.7/41.7	236	TGACATACAGGAGAAGCAACAAAG	GGTGTTAAAGAACCATTAGCCAAC
BFU0761	KF266109	(AC)8	59.8/59.8	42.9/41.7	271	TCCATAGCCTGCAAATCCATT	GGAATCAATCTTACTGCTGCTGAT
BFU0762	KF266110	(CA)6	60.2/59.7	47.6/43.5	252	ACTTTTCGCATCGGACAACAG	GTTTGAATTGTTGCCAGTGTGTC
BFU0763	KF266111	(AC)7	59.4/60.1	57.1/45.5	215	GAACCGTGAGAAGGAGACGTG	GAAATGCAGGTTCTTCCCTGTT
BFU0764	KF266112	(AT)6	58.2/58.7	37.5/45.8	205	AGACATCACAAAGACACAACGATT	CTGACCATGTGGAGACTGTTAGAA
BFU0765	KF266113	(AT)21	59.3/60.5	39.1/50	230	CCAATCAGATAAGCAAAGACGAA	TTGACTGCTAACAGTTGACGGC
BFU0768	KF266114	(CA)10	60.2/59.8	52.4/36.4	230	CTAATGCTGCCCTTGAGTTCG	GAAACGGCTGTTTTTTCAATCA
BFU0769	KF266115	(TTTTTA)3	60.6/59.6	47.6/29.2	182	TTGGGGTTGTCTTGTTTGGTG	ATTTTTCTTTCTTGTTGGTTTGGA
BFU0770	KF266116	(AC)6	59.6/59.7	29.2/47.6	236	TCCAAACCAACAAGAAAGAAAAAT	ACATAAGCACCAGCGGTTCAT
BFU0771	KF266117	(TG)10	59.7/59.4	43.5/37.5	98	CTTTGTGTACTCAATTCCCAGCA	AGGGACTTTACTTGCATCATTGTT
BFU0772	KF266118	(AAG)4	60/60.6	43.5/55	198	GTGACCGAAACATTCAGAACACA	CGCAGGTGGGTTTTGGTTAG
BFU0773	KF266119	(CA)8(TA)11	60.3/59.6	36.4/39.1	316	CCGTTTCTTTCATTTTTCCCAT	CATTTTTCCACCTTCAAAGTCCT
BFU0774	KF266120	(AAAAT)3	60.6/60.5	36.4/52.4	283	TCACCAAAATCACGAAAACCAA	GCGACGATATCAGTTCCATCG
BFU0775	KF266121	(AC)6	59.7/60	42.9/63.2	198	ATCATTGATGGATGCCCACAT	ACGGGGTGTTACAGGGTGG
BFU0776	KF266122	(CA)31(TA)6	60.8/60.5	55/47.6	282	GGCACTCGGATGAATTGTGG	ATATGCCAATAGAGGCGGGTT
BFU0777	KF266123	(TG)17(AG)19	60.1/59.2	38.1/39.1	198	GCGAATTGAAATCAAATGGGA	ATAGGCTTTTTCCCCTAACGTAA
BFU0778	KF266124	(TG)18(AG)18	59.2/59.5	43.5/52.2	197	TATAGCATGTTTCACTGTGTGCG	CCTCAGCAGTTATACCTCCACCT
BFU0779	KF266125	(TC)26(AC)8	59.2/59.7	39.1/47.6	243	AATTGCAAGTACCTGTCCATGAA	TGTTTAACACTGCATGCCAGC
BFU0780	KF266126	(CA)15(TA)11(GA)8	60.8/60.2	43.5/43.5	205	ATTTTATGGACGATCTGTGTGGC	ATGGGAACTACATTCTTGGTGGA
BFU0781	KF266127	(TC)14(AC)20	59.4/59.8	41.7/37.5	290	GGAGATAAGATGATTCCCTTGACA	ATCATGGTTTAGAAAGATGGCAAG
BFU0782	KF266128	(TG)20(AG)14	60.3/59.9	37.5/45.5	222	TTCAGAATTATTAGCACTTGGGGA	TAAGCAGGTGAAACCGCAATAC
BFU0783	KF266129	(CT)20(CA)13	60.4/60.2	43.5/43.5	287	AGCGACAAGATGTATTGGGAAAG	TCCATTAGTAAGGCGAGGTTTGT
BFU0784	KF266130	(ACATGT)3(AC)10(AT)13	59.5/59.2	45/41.7	145	ATTTTGCCACTGTTCCGGTT	TAAACCAAGAGGGTTGGTACTCAT
BFU0785	KF266131	(TC)18(AC)14	60/60.4	47.8/45.5	232	AGGAGAAGAAAGGACAGCAGTGA	GTAATTCGGACCTTGGGATTTG
BFU0786	KF266132	(TA)12(AAT)7(AAATAA)3	60.9/60.5	45.5/37.5	291	AAGCAAGGCAAGAAGTATGGGA	GTCTTAATTTGATGTTTCTGGGCA
BFU0789	KF266133	(TC)8(TA)6(TG)16	59.6/59.3	36.4/39.1	237	ATTGTCAAAGCATTGAAATGGC	TTAAAACCACCACTTTGCTCTTG
BFU0790	KF266134	(CA)23(TA)7	60.9/60.7	45.5/33.3	292	CTTTGTTGTGATTGCTTCGTGC	ACAATGCAAGAAATCGATAAATGC
BFU0791	KF266135	(CA)30	60.2/60.3	37.5/40.9	263	CCTCTTCCAGTTTGCTTAATTTGA	CATTTTGGATCTTGAGCAACCA
BFU0792	KF266136	(GT)29	59.2/60.2	37.5/45.8	226	ACATCTTAAGTTTCAACAAAGGGC	GGAAGTAGGACATTAACTGCATCG
BFU0793	KF266137	(AC)17(AT)12	57.6/57.4	33.3/25	209	TGGATGTCACTTGATAATTGTTCA	CAAAAAAGAAAATAATGGATGGTT
BFU0794	KF266138	(AC)19(AT)9	59.2/58	50/37.5	353	CCTTAAAAGCGGACCAAACC	GAAAGATCCCAGGAAATAAACTTC
BFU0795	KF266139	(TGAGAG)3(GT)7*(GA)12	59.7/59	40.9/55.6	274	AGGGGGAAATCTTTTGTCTTCA	CGCCGGGTAAAACCTTTG
BFU0796	KF266140	(AC)8(AT)11(AG)8	59.1/60	3.5/47.6	304	TCCTGTAACATATGAAACCCATCA	CAAGACAGCAACGCAATAGCA
BFU0797	KF266141	(AC)17(AT)10	60/59.3	37.5/41.7	308	TTGATGAGGATGGAAAATATCACC	CACATATTGCTGTCGCTTAGACAT
BFU0798	KF266142	(TG)13(AG)14	57.1/57.2	40.9/37.5	234	CAAAAGAGGTCACAGCAAAAAC	CGCATTAGACAAGGTATATGTGAA
BFU0799	KF266143	(TG)27	59.6/59	47.8/45.8	249	CTATGATTGTGAAGGAGGGAACC	TCTCTCACTGCATCATCTAACAGC
BFU0802	KF266144	(TC)17(AC)9	59.9/60.7	39.1/55	236	TTGTCAACTTTGTTGTTACCCCA	CATCGAATCCCCACAACCTG
BFU0803	KF266145	(TC)18(AC)8	58.9/58.3	55/39.1	257	ACCCCCAATCTACCAGACCA	TTCAGGAGAATATCCATCAGCAT
BFU0804	KF266146	(CA)13(TA)12	59.4/58.6	34.8/33.3	206	AGATTTGCATATGAATGCATGCT	CAAAATGAATAAAGTCTTGTCCGA
BFU0805	KF266147	(CT)11(CA)14	59.2/58.3	43.5/43.5	201	CACGTCCTTTCACGAGAACTTTA	CCATCTAACTCATCCCATCAAAG
BFU0806	KF266148	(TC)14(AC)11	59.3/59.7	61.1/42.9	301	CCTTGCCTGCGAATGTCC	TTAGGGGTTTTGCTTTGATGC
BFU0807	KF266149	(TC)12(AC)13	60.2/60.7	55/39.1	138	ATCCGTCCTAAACCCCAACC	AAGCAAAGGACAAACTTTTGTGC
BFU0808	KF266150	(AC)25	60.5/60.8	42.9/52.4	243	CGTTTTGATTGATGGGTTTCG	GAGAATTTTGGGTGGGTGGAG
BFU0809	KF266151	(AC)25	59.7/60	43.5/66.7	242	CTTGATGGCTAAGTGGGAGAAAT	TAGCCGACGTGCGGAGAC
BFU0810	KF266152	(AT)12(GT)12	59.7/59.2	42.9/33.3	306	AATGTCGATCCAAGGCTTTGA	AATTATCACCATTCGGTTTCTGTT
BFU0812	KF266153	(CA)24	59.7/59.4	50/43.5	186	ACAGCGAATCTTGTAGCCAGTG	TCTAAGCCAATCACTATGCTTGC
BFU0813	KF266154	(TG)9(AG)15	58.4/58.8	37.5/43.5	243	GATTTTAGGCAATACAAACTGACG	ATATAAGTCCCTCCCTGGCTTTA
BFU0815	KF266155	(TG)10(AG)14	60.3/60.8	43.5/34.8	300	GGTGCATTCCCAGGAAATACTTA	AATGCAATCACAAATGCAGTTGA
BFU0819	KF266156	(AC)10(AT)13	59.3/59.5	47.6/57.9	295	GGTTGGCTTCCTAATTGACCA	GCAGGACTGGAATGCGTTG
BFU0820	KF266157	(CT)23	59.4/57.8	33.3/33.3	243	GCGTTTACTTGAATTTTTCTCCAT	TCTTCAACACTAAATAAACGTGCA
BFU0821	KF266158	(AT)8(GT)14	57.2/59	33.3/45.8	195	AAGGGACATATTCAATAGGTTTCA	CCTTGAGACAAGCATAGTGAGTGA
BFU0822	KF266159	(AT)9(AG)13	59.7/59.5	39.1/29.2	281	AACCATAAAATCCAATACGAGCC	ATTTTGAAAATCAGTTCCCTTCAA
BFU0825	KF266160	(TC)14(AC)8	58.4/58.4	45.5/37.5	240	AATATAAGTCCCTCCCTGGCTT	GATTTTAGGCAATACAAACTGACG
BFU0827	KF266161	(TG)12(AG)10	59/59.6	41.7/47.6	212	ATTGTCACTTCTTGAGCCTAATCC	TGATAATAGCCTTCCCACCCA
BFU0828	KF266162	(AC)7(TC)8(TA)7	59.2/58.7	61.1/45.8	230	ACGCCTGTGCCGTTCTGT	TTCAGAAGAAGGTAGAGGAGGAGA
BFU0829	KF266163	(AC)13(AT)9	60/60.3	50/50	186	TGGTGTTAGAACGCCAAGCA	ATGAGCCGAGTAGGGTTATTGC
BFU0831	KF266164	(AC)15(AT)7	60.1/60	43.5/33.3	290	GGAAGCCATTGTAAATAACCTGG	GAAATAGATTTTAATGTGGCCCAA
BFU0832	KF266165	(TA)6(TG)16	58.4/58.4	37.5/37.5	191	ATGGTATCATGCGACATTACTTGT	TCTTCTGTAGCCATTTGATTTGTC
BFU0833	KF266166	(AC)10(AT)11	59.4/60	47.6/52.4	180	GTCCGAGAAACTCTGTTCCACTT	TTCCTCATCCTTCCCTGTCCT
BFU0834	KF266167	(TG)21	60.7/59.7	47.8/33.3	309	CGTTAGTGCGTGTTTCTTCCTCT	AATTTGGCGGAGACATTTCTATAA
BFU0836	KF266168	(TG)21	58.9/58.4	57.9/41.7	203	TGGGAGACAATACGACGGC	GTGGACAGTTGAGAGTTGAAATTG
BFU0839	KF266169	(AC)12(AT)8	58.6/58.8	45.5/45.8	311	TCCCATTACCACCTCACAAGTT	TGACTGCCATGAGTATAGGAGATG
BFU0840	KF266170	(AT)6(GT)14	59.8/60	39.1/54.5	244	TTCAATTCGGAATAGGGAAGAAG	GGTGGAGGAGGAATGGTATCAG
BFU0841	KF266171	(GT)20	58.1/58.4	29.2/45.5	314	TAAAAAGCAATCTCAAACGAACTT	AGGGCAGAGCAAGTATTTGAAG
BFU0842	KF266172	(CA)6(CT)14	59.1/59.9	42.9/47.6	274	AAGGAAAGCACTTGTGCCATT	TACAGACGGGATTTGGGCTTA
BFU0883	KF266173	(CA)10(TA)8	59.8/59.7	37.5/52.4	293	GCATTACAATTTACGAACCTCCAT	ATGTGTCCGCTCCGAGTAAGA
BFU0884	KF266174	(GT)11(GA)7	59.2/59.3	50/37.5	251	CAGATAGCAGGGAGACAATTCG	TTCTTTTCCATGCTCCTCTTATTC
BFU0885	KF266175	(TG)18	58.9/58.9	61.1/37.5	214	GCCAGAGCCGCACCATAT	TATGTTTGTCTTGTTCCCATTCTG
BFU0886	KF266176	(GT)7(GA)11	57.8/58	33.3/47.8	277	TGCATTATTCACATGATCAGAAGA	CGTGTAGGTTCTGTTCTTGGTCT
BFU0887	KF266177	(ACA)6(AT)9	59.7/59	57.1/50	215	CTGCAGGACTTGTGGAAGGAG	CGGAGCACTAAAGCAAACCA
BFU0888	KF266178	(GT)8(GA)9	60.1/60.2	39.1/34.8	253	AGGGTCGTCGATAAATAAAACCA	TATGCATTTGGGCTATTGATTCA
BFU0890	KF266179	(CA)9(TA)8	59.1/59.7	39.1/57.1	293	TGCATTACAATTTACGAACCTCC	GATGTGTCCGCTCCGAGTAAG
BFU0891	KF266180	(CA)7(TA)10	60/60.2	39.1/60	243	TCCAAATGCCTTTCAGTATCCTT	CTTCAACTCCACCCCCTCCT
BFU0892	KF266181	(TA)7(TG)10	60.7/60.2	41.7/55	284	ATGGTGTCATCATCGGTCTTATTG	CGCCACTGAATTGCTCTCCT
BFU0893	KF266182	(CT)17	60.2/59	41.7/29.2	193	AGGTCTTTTTACCCATTAACCCAC	TTCATATTCCCATGAAATTAAGCA
BFU0894	KF266183	(AC)10(AT)7	58.7/59.5	41.7/37.5	221	GGATTTCGGCTATTATAGTAGGGA	GATATTGCAGTTTGATGGGAGATT
BFU0895	KF266184	(AC)17	58.4/59	39.1/47.6	185	CTTTTATGATTAGAGCCATTCGG	AAGGAGTTGAACTTTGCGAGC
BFU0896	KF266185	(GT)17	60.9/59.5	52.2/45.8	326	CTGGCTTGCCTCTGTACTGTTTC	ACCCCTCTTATAGGCTGAGAAAGT
BFU0897	KF266186	(TG)6(TA)11	60/60	41.7/60	254	GTTTCATTCAAGGATACTGCCAAC	TCCACCTGTCCACCCACTTC
BFU0898	KF266187	(AC)17	58.4/58.5	41.7/38.1	223	CACTCAATAACTTCATCATCCCAG	TTGGAAAATTACATACGCCCA
BFU0899	KF266188	(CA)17	58/58.7	33.3/47.6	207	ATCCTTCACAATAGCAAAAGTTTG	TAACTTTGAGCACCGTCCATG
BFU0901	KF266189	(CT)17	59.8/59.3	40.9/50	304	CCGATTTTGTGAGGATGTTTTG	TGCCTATTAGCTTGGCAGTACC
BFU0902	KF266190	(CA)17	60.2/59.7	52.4/41.7	282	TAACCTCCTGTTATGGTGGCG	GATGAATCATAGTCACCCACCATT
BFU0904	KF266191	(GA)17	59.8/58.5	37.5/37.5	222	TATCAAAATAATTCCCCACAGAGC	CGGTAAGTCATTTGTTCCAATAGA
BFU0905	KF266192	(TA)7(TG)10	59.6/59.4	52.4/45.8	197	TTCAGTTTCAGCCTACCCTGC	TGACTGCTCCAAGTACACTCTTCA
BFU0906	KF266193	(AG)9(TG)8	59.5/60.1	41.7/33.3	224	AGTCTATTTATCCTGCTGGCTTTG	ATATTTGCATTATTCACCGCTTTC
BFU0908	KF266194	(TA)10(TG)7	58.3/58.8	29.2/52.2	273	CATCAATTTGCAATGTGATCATAA	GTGAAAGGACTCCCTAAGTGACC
BFU0909	KF266195	(TG)17	59.9/59.1	47.6/54.5	268	TGGAGACAATCTTCGGTTTGG	ACCGAACTGGTCTAGTGCACAC
BFU0910	KF266196	(TG)10(TA)7	58.3/59.2	33.3/37.5	96	TGCCCAAAATGAGTAACAAGTTAT	ACACACACACGCTCACAAAATAAT
BFU0911	KF266197	(CA)8(CT)9	60.2/59.9	47.6/47.6	267	AGGAAAGCACTTGTGCCATTG	TACAGACGGGATTTGGGCTTA
BFU0912	KF266198	(TTTTCT)4(TTTTC)3*	60.2/60.6	42.9/52.4	259	TGAAATGCCACATGTCAACCA	TGTGTGTCGTGTGTGTTTCGG
BFU0913	KF266199	(TG)16	61/61	57.9/45.5	293	TGGACAACCCCAATCAGGC	GGAAGGCATGGTTAAATAAGCG
BFU0914	KF266200	(AC)7(AT)9	60.4/60.3	50/57.9	290	ACCTCCTTCACCTGAATGATGG	GCTGTGCCGCAAAGTGAGA
BFU0916	KF266201	(AG)16	59.5/60	39.1/37.5	205	TGCCAAACAACCTAATCCTACAA	ACAGTCCACAAATTCATCCAAAAC
BFU0917	KF266202	(TG)7(TA)9	58.7/58.4	29.2/45.5	210	TTAATTTGATGGTCAGCAAATCAT	GATCGGGATATGCTAGATTTGG
BFU0918	KF266203	(TG)16	59.8/59.2	37.5/37.5	212	CTTGAATTCTACCCCAAGAAATGA	GAAGCCATTGTAAATAACCTGGTT
BFU0919	KF266204	(AG)16	59.3/60	55.6/47.6	172	TGGAGGGGCAAATGATGG	ATGGAGGACAAACCGTCACAA
BFU0922	KF266205	(TC)16	58.1/58.8	29.2/39.1	310	TGAAAATAAAGGTTCAACGATGAT	TTCTTTCAGCATTGGAGGAGTAA
BFU0923	KF266206	(GA)16	58.5/58.7	41.7/63.2	242	AGAGATTGTCCAAGACGAAGAGTT	GGCAACCTGTAGACGGCTG
BFU0924	KF266207	(TA)8(TG)8	59.8/59.8	37.5/47.6	327	AGATTGGTGAGTTGGGTTTTATCA	ACCCATACACATGCCCAAAAG
BFU0925	KF266208	(AT)8(AC)8	60.1/60.8	36.4/45.8	188	GCCATTGAAATCATTTGACCAA	ATTTCTAGGTCGGTCGTAGCAGAT
BFU0926	KF266209	(TG)16	58.7/60	43.5/37.5	228	GGTGCAGATGGGAAATATCAGTA	AAGTTAATAATCAACCAGCCATCG
BFU0927	KF266210	(GT)16	59.4/59	52.4/52.2	116	CCGCAACCCAGTTACTCTGTT	CTAGAGGGAGACTTGGAGCAACT
BFU0928	KF266211	(AC)9(AT)7	58.4/59.1	50/52.4	206	CCTCTACTGACTGCTCCAAGTACA	CCGTTTCAGTTTCAGCCTACC
BFU0930	KF266212	(TG)7(TTTATT)3	59.6/60.8	50/45.8	295	AGGTCTATCCCGAAACCAGGTA	GCCATAGGGTGGAACCATTATACT
BFU0931	KF266213	(AC)8(AT)8	57.3/57.2	37.5/36.4	256	ATGTAATGTATGTCAATCCCACCT	TTGGAAATTTGTAAGGTCGGTA
BFU0932	KF266214	(AC)16	57/58.8	37.5/55	209	CATAACATCAACATAAACACGACC	TCCAGACGCAGCTCAACACT
BFU0933	KF266215	(AC)16	60.7/60.7	45.5/47.6	262	CACAATTATGCACCTCCCATCA	TGGCTGTTTACGTGGCAATCT
BFU0934	KF266216	(TA)8(TG)8	58.8/58.7	45.8/55.6	276	GAAGCAGTAAGACAGTAGCGTTGA	CCATCTCGCATTTGCGTG
BFU0936	KF266217	(TA)9(TG)7	59.6/60.1	50/43.5	259	CATGCCAAACTCCAAACACG	TTGAAGTGGAGAACCCAAGAATC
BFU0938	KF266218	(GA)16	58.2/58.6	33.3/33.3	242	CTAAACATGGCTTAAAGAAATGGA	CCATTCACGGATAGAAATTAACAA
BFU0939	KF266219	(AT)16	60.6/60.2	47.8/33.3	206	GAATGCAACCCCACCTAGTAATG	CCATTAACGAAAAGGAACAAAGAA
BFU0940	KF266220	(TA)8(GA)8	60.4/59.6	41.7/41.7	179	TGTTTTCCTTCCTTATTCCTCTCC	AGGCCTGGCCTATATTATATCACA
BFU0941	KF266221	(CT)16	59.1/59.3	63.2/45.8	239	GGCCACCAGTCACCACTCA	GCTGAGAATGGATAGATTGGAGAG
BFU0942	KF266222	(CT)6(CA)10	59.9/60.1	54.5/55	206	CTACCCTCGCCATCTTCTTCTC	GAAGCGATAACGGCTGGTGT
BFU0944	KF266223	(CA)8(ACA)6*	58.4/58.9	50/33.3	262	CCAATCTATGGATGACCACCTC	TATGCTTTTCTGTTTCTTTGGTTG
BFU0945	KF266224	(GT)6(AT)9	60.6/59	45.5/41.7	273	TGAAAGAGCAAAGACAGCCATG	TTACTAATTCGTGTACTCCCTGCA
BFU0946	KF266225	(TC)15	58.8/58.8	42.9/37.5	359	GCAACGGTCATGATTGATTTG	ACACACCCATCCATATTCACAATA
BFU0947	KF266226	(TA)15	59.8/59.4	47.8/40.9	229	TCTGGGATACATCTCCTGCTCTT	TGTTTGGGAGCCCATTTTACTA
BFU0948	KF266227	(AT)9(GT)6	60/59.9	45.8/60	241	GAGATTGTCCAAGACGAAGAGTTG	GGCAACCTGTAGACGGCTGT
BFU0949	KF266228	(TG)15	59.8/58.5	37.5/37.5	222	TATCAAAATAATTCCCCACAGAGC	CGGTAAGTCATTTGTTCCAATAGA
BFU0950	KF266229	(GT)8(AT)7	59.9/59.6	37.5/39.1	233	TACTTGTTTGATTTCCCTTTCTGG	CAAACCCACTTCCATTTTCTCTT
BFU0951	KF266230	(CT)15	59.6/59.2	60/42.9	202	CCGACTATCTCCGCTGTTCC	ATGCTTTATTGGGCGAGTGTT
BFU0952	KF266231	(CA)15	60/60.2	54.5/43.5	241	GGTGGAGGAGGAATGGTATCAG	AATTCGGAATAGGGAAGAAGACC
BFU0954	KF266232	(GT)15	59.2/59.3	42.9/50	409	CCAATGATTTGGGTAAGGGAA	TGGGTTGGACGAGAGATTACAG
BFU0955	KF266233	(TG)8(TA)7	60/59.9	33.3/33.3	301	CATTCATTTGCTTGTTTTCCTTCT	TCAACAATACCCATTTTGATTCCT
BFU0956	KF266234	(TG)15	59.9/59.6	33.3/37.5	216	AATTTTTTGAACAAGATCCAGACG	TCAACATAAACACGACCATATTGG
BFU0957	KF266235	(TC)15	58.5/59.2	37.5/50	261	CGGTAAGTCATTTGTTCCAATAGA	AGCCAGTCCATACAGAAGCAGA
BFU0958	KF266236	(AC)8(AT)7	60.9/59.8	40.9/45.5	267	TGAACATTGATGCTTGCCCTTA	TAGGGAATACAAATGCGACTGC
BFU0959	KF266237	(AG)15	58.7/60.2	42.9/45.8	225	GCCATCACATGAAAATGTTGC	CTAGAATGCGTAAAGATGGTGTCC
BFU0960	KF266238	(CA)15	58.5/58.6	42.9/33.3	214	ATGGACGAAAGGGATATTTGC	TAAACTAAGCACTTTTGGAATGGA
BFU0961	KF266239	(CA)15	60.2/60.3	52.4/40.9	226	CCACTGATAAAACACCACCCG	TTCATAAACACTTGGCACGCTT
BFU0962	KF266240	(TC)15	58.3/58.1	45.5/61.1	220	TCTACAACAAGCAGTCCCACAA	CTTTCCTTCGTAGCCCCG
BFU0964	KF266241	(TG)15	60/58.9	45.8/33.3	199	AGGAAGTGATAGGTTCTTGAGGCT	TTCACCAATTAAATATGCTAACGG
BFU0965	KF266242	(TG)15	59.5/60.3	43.5/45.8	317	CAACCCGGATTAGTGACAACATA	GCCTTGGTGAAGATATAAGGGACT
BFU0966	KF266243	(AT)8(AC)7	59.8/60.5	63.2/50	197	GTCCACATCTTCCCGAGGC	ACGATTTCGCCACCATCAAC
BFU0968	KF266244	(AT)14	57.1/57.1	33.3/29.2	252	TTCCTATTTATGCATACATGGCTA	TTCAAAGCATTTAGTTCATACCAA
BFU0969	KF266245	(AT)7(AC)7	60.3/60.2	50/57.9	284	GAAGCATGCCCTGCAAAGTT	GGCGGAGAAGGCAAAGAGA
BFU0970	KF266246	(CT)14	59.1/59.3	50/47.8	233	GCTTCTCATCCCTTCCCTTTAC	CCTTGTTTCAGAGTCCCTATGGT
BFU0972	KF266247	(GA)14	60.6/60.1	43.5/43.5	181	TATTTACGGTTTCTGGTCTTCGG	AAGTTGCTGCTTCCTCTGTTCAT
BFU0973	KF266248	(AC)14	58.7/58.3	33.3/34.8	265	AACACAACGAAATCATATGCAAGT	GCTTCAATGCCTTAATTTTGATC
BFU0974	KF266249	(TTTA)7	59.1/59.5	39.1/50	234	TTCCACCTGGTTACAAATCTCAA	GACTTTAGCAAGCTGGATGCAC
BFU0975	KF266250	(TG)14	59.4/60	47.6/37.5	361	ATGGGGGGACCAATCTAATTC	TGATCTGCACCATAGAATTTTCCT
BFU0976	KF266251	(TC)14	60.2/60.6	45.5/43.5	191	GCCAAACCTTCTTCTCGACAAT	GTGGGTTTTTATGGACTTCGCTA
BFU0977	KF266252	(TG)14	59.7/58	45.5/41.7	279	ATTCTCCTGCCGATTTCTGACT	GTGTTTAGCTGAACTTGCTCAGTT
BFU0979	KF266253	(AC)7(AT)7	59.8/60.3	52.4/61.9	201	CACTAACTCCCATGCGGTGAT	CCTCGCCCACCTAGATACTCC
BFU0980	KF266254	(GT)7(AT)7	60.1/60	45/57.9	151	TCTTTCGCTGCAACCAAACA	GTGTATAACCACGCGCCCA
BFU0981	KF266255	(AC)14	57.9/58.1	37.5/30.4	117	AAGAGAAACTCCCATTGAGGTATT	TAACCAAAAACTTGCATTCATCA
BFU0982	KF266256	(AG)14	59.9/59.8	52.4/37.5	269	TGACGGAGAAACTTGGAGGTG	ATTAGAGATTTATTGCCAGAGCCA
BFU0983	KF266257	(CA)14	58.6/58	45/29.2	260	TGCCATTCACCAGATTCGTT	AATCATTTGGTTTGTTTGAGAAGA
BFU0984	KF266258	(AAAC)4(AATC)3	60.1/60.9	50/43.5	211	TCCCATTTTGGCTCTTGCTC	TCCAAATTACAACACCACACACG
BFU0985	KF266259	(GT)7(AT)7	59.1/59.3	50/52.6	157	CAACATGGTTCTTTCGCTGC	TATAACCACGCGCCCAATC
BFU0986	KF266260	(CA)14	58/58	45/29.2	264	CCATTGCCATTCACCAGATT	AATCATTTGGTTTGTTTGAGAAGA
BFU0987	KF266261	(GT)6(GA)8	58.5/59	45.8/34.8	161	GAAGTGGGCCATACATATGTAGTG	GCTCAGGCAAAACAAAAAAACTA
BFU0988	KF266262	(TTA)9	59.5/60.6	42.9/50	297	AGGAGCAATGGTGCAAAAAAC	GTGAATCATCTATCGCCCAGGT
BFU0989	KF266263	(GGT)9	58.1/58.4	33.3/37.5	146	TAAGAGATTGGATCTTTTCGATCA	TCTATCCCTTTTCCTTCATTTCTC
BFU0990	KF266264	(TG)7(TA)6	60.8/59.6	39.1/43.5	258	GCTTTTGATTGTTGGCTGCTATT	AATTGGGCTTATACTCCTGATGG
BFU0991	KF266265	(AG)13	59.3/59	52.4/41.7	241	GGTGGAATCTAGCGCCATTAG	TCTGTCTCTCTTTCCAGATCCATT
BFU0992	KF266266	(GT)13	59.7/58.6	42.9/33.3	207	AGTTTCAAGCAAATGGCGTTC	TGCCCAATGATGTATAAACTCAAT
BFU0993	KF266267	(AC)13	60.2/60	41.7/45	228	AGCTCACAATTAACCACCAATGAC	TGCCAAACTACCTACGTTTACTCC
BFU0994	KF266268	(TG)13	59.3/59.4	45.8/47.6	374	GTTGTAGCCAATCTACTTCCAGCT	CATCAACACGCCCTTTTCTCT
BFU0995	KF266269	(TG)13	59.5/58.2	40.9/29.2	149	AGACATGCACAAGCCATTTTTC	AATGCAATTGAAAGAAAATGTAGC
BFU0996	KF266270	(AT)13	57.8/57.1	34.8/41.7	293	ATGATTTGGATTTGACCTTGAAC	ACCACCAGTATTTTAACGTAGAGG
BFU0997	KF266271	(AT)6(AC)7	59.3/59.6	45.8/45.5	269	CGTAGGAGAGACTTTGAGAAGGAA	CAACAGTATTGCAACACTGGCA
BFU0998	KF266272	(AC)6(AT)7	60.2/60	52.4/43.5	268	TCACAGACTCCCTTCCAACGA	TGGTGTCATCATCGGTCTTATTG
BFU0999	KF266273	(CT)13	59.5/59.1	52.6/43.5	151	CAGCAAGCGTGCCATTTCT	GTAAAACACAGATTCGGTAGCCA
BFU1000	KF266274	(AG)13	59.7/59.6	43.6/45.8	334	AGAGTGACAAGAATTCCCATGCT	CTGGGAATATCCATGAGTGAGAAC
BFU1001	KF266275	(AC)13	58.7/58.3	33.3/34.8	265	AACACAACGAAATCATATGCAAGT	GCTTCAATGCCTTAATTTTGATC
BFU1002	KF266276	(AT)13	59.7/60.3	43.5/41.7	263	TGTAGGTAAATTCTGCCTGCTCA	CAAGATTTGTCCAATAGGGAGTGA
BFU1003	KF266277	(AC)13	60.1/60.3	39.1/43.5	294	ATAACGAATGGAGCCCTATTTCA	TGAGGTGTGTTAATGCTGCCTTA
BFU1004	KF266278	(CA)13	58/57.9	39.1/50	206	CGAATCTCGCTTCAAAGTAGAAT	GAAAACCCAAAGTGGCACAG
BFU1005	KF266279	(TATAT)3(TA)8*	59.7/59.5	33.3/37.5	168	AGACAAAAAGGAGGCATTATTGAA	ATAACGCATAAATGAAAGAGGAGC
BFU1006	KF266280	(GA)13	60.7/59.6	50/52.4	260	GCCAAAATGGAAGTCGGTCA	GGAGGTGTGTCCGAATCAGAA
BFU1007	KF266281	(CA)13	60/59.8	57.9/68.4	229	CATAAGTGCCGCAGGGTCA	CTCCGGGAGTACCAGGGTG
BFU1008	KF266282	(GA)13	59/58.3	61.1/42.9	225	CCTGCCTGGATTGGATGC	GATTGTTGGGCCTTTTCTTTC
BFU1009	KF266283	(TG)13	60.2/59.2	39.1/42.9	259	TCAACCATAATCCACCATGTCAA	ACGAAATTGCATCCTTCCAAC
BFU1010	KF266284	(CT)13	60.1/60.8	6.7/45.8	190	GAACACGCCAGCCACCTG	GCCAATCACAGACTGACAACACTT
BFU1013	KF266285	(CT)13	59.8/60.7	39.1/50	253	ACCACCAAATCTAAACCCCAATA	GGTTGTATTCTATGCCTCCCCA
BFU1014	KF266286	(GA)12	58.1/58.4	38.1/55	212	AACAAGCATTTCGTTGTTTGG	TACCAGATCCCGAGTTCCCT
BFU1015	KF266287	(AC)12	59.2/59.4	37.5/55	240	TATAGGCTCAAAGATGCACAAGAA	GATTACCCCGTCTTCGATGC
BFU1017	KF266288	(GA)12	59.8/58.2	47.6/52.4	132	CCACGGTGGCTTTTATTTGAC	CGTGTAACGAGAATCGGTCAG
BFU1018	KF266289	(TAT)8	59.2/60.5	33.3/50	321	AGCAGTACGCATTATTTCAATCAA	ACCTGCTATCAGTGACCACCTACA
BFU1019	KF266290	(TG)12	58.4/59.7	41.7/45.5	140	AGAGAGAGAGAAAAAGGTTGTTGG	GTCCATCCCCCAAAGTTGTAAT
BFU1020	KF266291	(AC)12	59.5/59.8	50/54.5	244	AGAGTCCGTTAAGAATCCCTGC	GACTCCAGGAAGGATCATGGTC
BFU1021	KF266292	(AC)12	59.7/59.7	41.7/33.3	357	TACAGAACCGCGATGATGTAAGTA	ATTCGTTGTACGATTGCATTACAA
BFU1022	KF266293	(AT)12	60/60	39.1/45.8	309	TCGCTTGAAAACCAATAACTGTG	TGCCAAACTACCTACGTTTACTCC
BFU1023	KF266294	(TG)12	60.2/60.9	40.9/50	126	ATGGGATGATTTGGATTTGACC	GACGTCCCCTTATAAGACCCTACA
BFU1024	KF266295	(GA)12	60.2/60.5	34.8/61.1	156	GGATGCCAATCAAATGGTAAATT	TGCGAGCAGCCCCTATCA
BFU1025	KF266296	(CT)12	60.7/60.3	50/41.7	181	GATAAAACCCTCAAGGTCGCTG	AGTAAAACACAGATTCGGTAGCCA
BFU1026	KF266297	(AG)12	60.3/59.7	41.7/37.5	108	AGCCAAGTCATTGCGTAATATAGC	AATTACTCATCTTGGACGGCTTTA
BFU1027	KF266298	(CA)12	60.1/60.4	57.1/41.7	231	GTATGGTGACTGGTGGCAAGG	ACGAGTATCCCAAAAGGGTATCAT
BFU1029	KF266299	(AC)12	59/58.9	47.6/61.1	210	ATCATTGAAGCCATCGGTCTC	GCATCAGTGAGCACCGCA
BFU1030	KF266300	(AC)12	58.6/59.1	33.3/47.6	232	TTAAAGTGGAATGGATGGTTCATA	CTGCTGTTCGGTTTGCTGTTA
BFU1032	KF266301	(TATT)6	58.9/59.6	45.8/40.9	295	CTGGGTAACAACTCAGATACACGA	TTCAGCAAATTCATCCTGGAAG
BFU1037	KF266302	(TC)12	58/58.6	39.1/47.4	221	CTAAACGAACGGTCTAAAACGAT	CAGGGGTTTGAAAAGCGAA
BFU1039	KF266303	(AC)12	59.1/58.1	33.3/29.2	125	CCATTTCAACATCGTAATTTAACG	ATGCATGTGACCAATTTTTTAGTT
BFU1040	KF266304	(TC)12	59.7/59.8	45.8/37.5	251	TATGTGGGGTGAGTAGTGAAAGGT	AATTCCATTAGTGTCAACTTTCCG
BFU1041	KF266305	(TG)12	59.3/60.3	43.5/52.4	189	GGTCAGGTAAATCAAAACAGGGT	CAGACTGGCGTTCCCTTTGTA
BFU1042	KF266306	(AT)12	59.8/60.3	45.5/47.6	213	CGTTGCAAATACTACCTTGGGA	AATCCGTATGGCAGGGAAGTT
BFU1043	KF266307	(AT)12	59/59.2	50/55.6	186	CAAGGCTATTAAGGCGGGTT	CCTTTCTTTCCCACGCGA
BFU1044	KF266308	(TAT)8	59.8/59.8	41.7/43.5	194	GTATAATCCCTTGTGATTGATGCC	ACCGGTGGGACTAATGGTATTAA
BFU1045	KF266309	(AT)12	59.4/60.1	40.9/55.6	284	CGAAAACAGACCAAAACCAAAG	GCATTTGGGCATGGCAAC
BFU1047	KF266310	(TG)11	60.2/60.5	63.2/41.7	425	TGTAGCCCAACCAGGGTCC	AATTTCCAAGGAGTGAGTGGTTCT
BFU1048	KF266311	(AC)11	59.1/58.6	60/33.3	232	TGCACAGAGGAGACAGCGAC	TTCTTAAATAAATGAAGAGGCCCT
BFU1050	KF266312	(AC)11	60.6/59.8	50/40.9	185	CACTCAAGTCCGACACCTGTAAAC	ATAAATGGTCAAATCAGCAGCG
BFU1051	KF266313	(TG)11	58.1/58	33.3/45.5	279	ATGAAGCATACCCATAAAAGAACA	AACAAGAGGACAAGCAAGGTTC
BFU1052	KF266314	(CA)11	59.3/59.5	41.7/37.5	227	AATAGGTCATAGGAGGCTCATTCA	TGGGATATCTTTCTTTCATTCCAC
BFU1053	KF266315	(TC)11	59.1/60.3	50/52.2	190	GGTGGAATGGGGATTGTTGT	CCTGAGAGTTGGCTGAGATACGT
BFU1054	KF266316	(AT)11	58.9/58.7	41.7/37.5	285	CATTTTACTGGAAGCATACCTGTG	TTACCAATCTCCTTTGGAAAGTCT
BFU1055	KF266317	(GA)11	59/59.2	50/52.6	212	CATCCTTCTGGTATCAGACCCA	CGCAAATGCCACGAGAGAT
BFU1056	KF266318	(TA)11	60/60	50/45.8	209	GTGGGAAGGTGCTAATCCGTAT	CTTGGGAATGTACGTATGGGATAG
BFU1057	KF266319	(TC)11	59.2/60	57.1/55	233	CTCTGACCCTACCAACTGCGT	CCGGTAGATGTGGGATTTGG
BFU1058	KF266320	(AC)11	58.6/58.1	37.5/43.5	227	AGATAACAATCAAGCACCAAGTCA	CTTACACCTCTGCAAAAGGAAAC
BFU1059	KF266321	(AT)11	60.5/60.4	37.5/66.7	217	ACAGATTTACGTGGAAAACGCTTA	TCAGGTGTGGGACAGCGC
BFU1060	KF266322	(TC)11	59.7/59.5	37.5/60	160	AACGGCGTTAATCTAATTCTATGC	AGCGTAGAGAGGCCATGAGC
BFU1061	KF266323	(GA)11	60.2/60	52.4/43.5	268	TCACAGACTCCCTTCCAACGA	TGGTGTCATCATCGGTCTTATTG
BFU1062	KF266324	(TA)11	58.2/58.5	40.9/33.3	221	ATTTCTCCTCCGTAAATTGTCG	TCCGGAGACATTAAAATAGCATAA
BFU1063	KF266325	(TA)11	60.1/59.4	45.8/33.3	165	AGAGAGGAAAGGAGTTGCTGACTT	GACCAACATTTTCAAAGGATCAAT
BFU1064	KF266326	(AT)11	58.6/59.1	33.3/47.6	232	TTAAAGTGGAATGGATGGTTCATA	CTGCTGTTCGGTTTGCTGTTA
BFU1066	KF266327	(AC)11	59.8/59.2	45.8/37.5	290	TGAAGTGGTGACTATGACTGACGA	GCAAAGTTCTTCAACCCTTGTAAT
BFU1067	KF266328	(CA)11	60.3/60.2	43.5/33.3	358	CAATTGCAAGTACCTGTCCATGA	TTAAAAAACGAGAGCATTGCTCTT
BFU1068	KF266329	(TC)11	60.3/60.6	37.5/41.7	82	GAATTCTGTAATGCCCAAAAGTTG	ACCCATTATGCTTGGATTAGGAGT
BFU1069	KF266330	(TA)11	60/59.8	40.9/45.5	156	GGATTTGCTCGTTATGTTGTCA	CTGAAAGCAGCGTAGAGAACAA
BFU1070	KF266331	(TG)11	59.9/60	50/40.9	284	GAGCCGATGGTTATATGGAGAG	CCTGTAAACATGTCAGCCAAAA
BFU1072	KF266332	(GA)11	59.5/59.8	33.3/29.2	174	TGCATCCGCTAACTAAATAAAACA	TGGAGTTGTTGCAATATTTTTTCA
BFU1073	KF266333	(TC)11	60/60	40.9/50	291	AAGTGGGGTTAAAAACATGGTG	GAAGTGCTGCTGAGTTGTCATC
BFU1074	KF266334	(CA)11	60.4/60.5	37.5/45.5	251	CCTCATGCTTGGTTTGATACAATT	GACTTTGGCGCAATACCCTATT
BFU1075	KF266335	(CT)11	60/60.1	40.9/50	154	AAACATGCCCTCTTTCAAGGTA	ACTAGGAACACACACACGCAAC
BFU1076	KF266336	(AC)11	59.9/59.4	47.8/34.8	92	GAACATCACCTTCTCGGCTATTC	CTAAATTTTTCCAAAGGCCAACT
BFU1077	KF266337	(AT)11	59.6/59	39.1/50	200	TGAATTACCAAAGGCTAAGATGC	CGCCCTATTGAAACACACAC
BFU1078	KF266338	(AC)11	59.8/60.1	50/50	244	TGCAACACTACTAGCCCCTACA	TAGCCAACCGGTTCAGTTTC
BFU1079	KF266339	(GT)11	59.4/59.5	45/50	124	TGTGCTCTGTTTTTCCCTCA	ACCTTCTCTGCAAACCAAGC
BFU1080	KF266340	(CA)11	58.9/60.4	45.4/37.5	100	TACTTCCTGCCCTACACTTGAA	CCTGGACCATTTACAACTCAATTT
BFU1081	KF266341	(AT)11	59.4/60	47.6/50	204	GGGATCCCTCATTAAAGCCTA	TTCAACTCCTCTCGCAGGTT
BFU1082	KF266342	(TC)11	60/60.2	50/50	161	ACTCAATGCAACCCTGAACC	AAGCAGCAACTGCCAAGACT
BFU1083	KF266343	(TG)11	60.4/60.3	45/50	232	ATTTGGATGGATGGGAAGGT	GGGACATCAGCAATTTGGAC
BFU1084	KF266344	(ATT)7	59/60	42.9/50	252	TGCTTGGTATGCAAAGTGAAG	CATTCTCGACCACCACCTTT
BFU1085	KF266345	(AAC)7	60.1/60	45/40	179	ACTGGCAATCGATGTCACAA	TCTCTTTTGCGTTGCCTTTT
BFU1086	KF266346	(ATA)7	59.7/59.9	50/50	243	TGACGGAGAAACTTGGAGGT	CCATTGACACTCAGCAGCAT
BFU1087	KF266347	(CT)10	60.2/59.6	47.6/45	260	CATTTACACAGTTCCCCATGC	TTCCTCAACAGCGTGCTTTA
BFU1088	KF266348	(TA)10	59.4/60.1	39.1/45	135	CCATAAAATCCAATACGAGCCTA	TAATGCGGGACAAGTGTTGA
BFU1089	KF266349	(TG)10	60/60.5	45/50	153	CCTGCTTTGTCTTTGCATGA	GGTGGGGGATTAAGAAAACG
BFU1090	KF266350	(TC)10	60.3/59.9	45/50	217	CGTCCAAAAATCCAAACTGG	GCCATATCCCTGCTTGTCAT
BFU1091	KF266351	(TA)10	60.1/59.7	50/45	233	GTGCGCCTGATCCTCATTAT	CGCAAATCTGACGGATGTAA
BFU1092	KF266352	(TG)10	60/60	45/45	199	CATTAATGGGGGACAAATCG	GTGATGGATCGAGCGAAAAT
BFU1093	KF266353	(TA)10	58.8/58.9	38.1/45	217	CAATCAAGCACCAAGTCAAAA	CACCTCTGCAAAAGGAAACA
BFU1094	KF266354	(AG)10	59.9/59	50/36.4	132	CGGTCCCACTATTTGAGGAA	TGCGCTATTTCTCTTACCAAAA
BFU1095	KF266355	(AG)10	59.9/60.1	40.9/45	234	TCCCTAAATTACCCTTCCCAAT	AAAGCGACAGCGAAAACTGT
BFU1096	KF266356	(CATA)5	59.2/59.3	45/47.6	206	TTTGCTTGACAGCGAGATTC	GGGACTCCACACACATTTTTC
BFU1097	KF266357	(TA)10	60.1/60	42.9/45	239	TTAATCGGCTGAAACACAAGG	AGCCCAACAGAGAAAGCAAA
BFU1098	KF266358	(AC)10	60/58.9	39.1/42.9	283	CAATCCATGCATGCTATACAAGA	AACCAATCTACGCAAAGGCTA
BFU1099	KF266359	(ATTT)5	60/59.2	40/45	106	AACCATTTTGAACCCCATGA	ATGGTTGCTAATCCAGCACA
BFU1100	KF266360	(AAAT)5	59.6/59.3	40/40	235	AGATGGCAAAGCAAAACCAT	AACCTTTTTGAACCCCATGA
BFU1101	KF266361	(GA)10	59.6/59.9	50/42.9	274	TTGAGAGCAGCCAGTCCATA	CCGGTAAGTCATTTGTTCCAA
BFU1102	KF266362	(CA)10	59.9/59.7	37.5/36.4	199	AAATAGGCAAACAGGTAATCTTGC	CGAAGTGCAAAATTGTTTATCG
BFU1103	KF266363	(CA)10	59.4/60.1	47.6/40	182	GGTCACCTTAAGAAAGCGACA	TTGTTTGGTTGCCTGCATTA
BFU1104	KF266364	(GGGA)5	59.4/60	47.6/50	216	GGTGCAGATGGGAAATATCAG	AACCAGCCATCGTTATGAGG
BFU1105	KF266365	(CA)10	60.3/59.8	45/42.9	286	GCTGAACACGGCAAAGAAAT	GCCATGAATACAGGCCATAAA
BFU1106	KF266366	(CA)10	59.8/60.5	47.8/37.5	100	TTCTACTTCCTGCCCTACACTTG	CCTGGACCATTTACAACTCAATTT
BFU1107	KF266367	(AG)10	59.9/59.9	45/45	161	TGGTTTTCAGAGGGTTTTGG	TTCAAACGCTACCCATTTCC
BFU1108	KF266368	(CA)10	59.6/60	50/50	129	CTTACCAATGCCCACACTCA	GGGACGGTTAGCGTATTTGA
BFU1109	KF266369	(AT)10	59.9/60.5	45/50	223	ACGAAGCAAGGCACATCTTT	CAATACTGTGGTCCGCATGA
BFU1110	KF266370	(AT)10	59.5/59.4	50/45	298	GCGGACCACAGTATTGATGA	GCACGATGGTTGACAATGTT
BFU1111	KF266371	(AC)10	59.8/59.4	50/50	259	CCACCACTCAATTCCTCCAT	TTCCCACATTGACACAGACC
BFU1112	KF266372	(TG)10	59.4/59.7	39.1/47.6	188	TGTGTCACGGAATCATGTAGTTT	GGGAACAAAAGAGAGGGAGAA
BFU1113	KF266373	(TG)10	60.6/59.1	45/45	241	CAATGAATAATGCGGGGTGT	TGTGGATTCTACTGCCCAAA
BFU1114	KF266374	(TA)10	58.6/59	45/38.1	213	TTTCCCTTCCCACTAAAGGA	TGCAATCAAACAGTTCCATGT
BFU1115	KF266375	(TC)10	59.4/60.5	45/45	138	GGTCCATAATTCCCATCCAA	CCCCACCAACATCAACATTT
BFU1116	KF266376	(TG)10	58.8/59.8	40.9/50	209	ACAGCCAATACATGCTATGCTT	GGATCAGCAGCATTTCCTTC
BFU1117	KF266377	(AC)10	58.3/60.1	39.1/40	231	TGTAATGTATGTCAATCCCACCT	TTGGATTTTTGGCAGAAAGG
BFU1118	KF266378	(AC)10	58.3/60.2	50/45	178	TTCACTCAAGTCCGACACCT	GTCAAATCAGCAGCGGAAAT
BFU1119	KF266379	(AC)10	59.7/59.3	45/45	206	AGTCCCATCAAGCCTTTGAA	CCCTAATGCCAATGGTTTTC
BFU1121	KF266380	(AT)10	59.3/60.1	50/50	221	CAAAGGAGGGAGGCAGAATA	GAACGAAGGGAAGGAAAAGG
BFU1122	KF266381	(TG)10	59.9/60.9	50/45.5	239	GGACCTTAATGCCCTCAACA	TGCAGGGACAGGATATCTGATT
BFU1123	KF266382	(CA)10	59.9/59.6	42.9/50	270	CCGGTAAGTCATTTGTTCCAA	TTGAGAGCAGCCAGTCCATA
BFU1124	KF266383	(TG)10	59.8/59.5	45/47.6	203	GCACTGGAAATTGATGCAGA	GAATGCGTAAAGATGGTGTCC
BFU1127	KF266384	(GAAAA)4	59.8/59.9	50/45.5	276	GTGTGTGTTTTGCTGGTGCT	AGTTATGCCACATGTCACCAAG
BFU1128	KF266385	(CA)10	60.8/59.5	45/42.9	215	TGGAATCATCAACCACCACA	CACAACCTGTGAATGAAACCA
BFU1129	KF266386	(AC)10	59.8/59.4	50/42.9	243	GGGAATATGTCGCCCTGTAA	TCCAGGAAACCCAGATAACAA
BFU1130	KF266387	(TG)10	59.6/59.9	50/42.9	274	TTGAGAGCAGCCAGTCCATA	CCGGTAAGTCATTTGTTCCAA
BFU1132	KF266388	(AC)10	59.8/59.9	40/40.9	234	CCTCCATTTTGGCATTGTTT	CCGCATAAAAGTTGGTATGTGA
BFU1133	KF266389	(AC)10	59.1/58.9	38.1/50	105	TGTTTGTATGGGAGTGCAAAA	GCACCCTGCAAGGTATAACA
BFU1135	KF266390	(CA)10	60.4/59	45/42.9	178	TTGCCTCCATCGTTTGAAGT	CAAAACCACACCAACAAAGTG
BFU1136	KF266391	(TG)10	59.6/59.5	42.9/50	162	TTCAAGACCTCCACGATGTTT	TCCCACCACTTTCCTCTCAT
BFU1137	KF266392	(AG)10	59.2/60.8	50/50	181	AAGCCATGGTGGAGATATGC	TCTCGACAGTTGCCCATCTT
BFU1139	KF266393	(AC)10	60.9/60	50/45.5	199	CCATTTTGGCTCTTGCTCTG	AACACCACACACGTTTTACTCG
BFU1140	KF266394	(CA)10	59.1/58.7	45/50	259	TTCCACCCAGATGTAAGCAA	GGGTAAAAGAGAGGGCATTG
BFU1141	KF266395	(CT)10	58.7/59.9	45/40	273	CACGAGAGATGGTGCAATTT	TCGCAATAAACACCATTCCA
BFU1142	KF266396	(TC)10	60.4/60.2	47.4/50	189	AGAACAAACCGCCACCAAT	GCATTGGAGGAGCAAGTGAT
BFU1144	KF266397	(AC)10	59.9/60.6	42.9/45	200	TGTGATCCCAAATCTTTCCAG	AAAAACCCCTCGTGGAACAT
BFU1145	KF266398	(TA)9	60/59.3	47.6/50	214	TCCAGCCATACTGAAATGGTC	ACCCTGGTTGGGCTACATTA
BFU1146	KF266399	(AC)9	59.4/58.7	45.5/38.1	119	GGTCGATTTTAGTATGGGCAGT	TGGCATGAAAAGTAATTGCAC
BFU1147	KF266400	(CACACT)3	60/60	45.5/50	225	CACTCACTCACACAAATGAGCA	TCCACAGCCGACTTTCTCTT
BFU1148	KF266401	(TG)9	59.9/58.5	45/45	125	TTGGAGCATCATCACCCATA	GGAGAAGGCCAAAGAAAAGA
BFU1149	KF266402	(AGA)6	60.1/59	50/45.5	241	GGTGGAATCTAGCGCCATTA	TCTGTCTCTCTTTCCAGATCCA
BFU1150	KF266403	(AGAGAC)3	59.3/59	50/50	129	TGGCTGAGTGTGTGTGTTTG	GCCGAGGGACATCAACTTAT
BFU1151	KF266404	(CA)9	59.9/58.9	47.6/30.4	282	GCGAGCAGTACGCATTATTTC	AAAACTCAATCATTATCGGCATT
BFU1152	KF266405	(AAG)6	59.8/59.9	45/50	255	TTATTTTTCCGAGGGTGTGG	TCGACTGCTGAAGAGCGTTA
BFU1153	KF266406	(AATAAA)3	59.3/60.5	50/50	271	TCGATCATATGGAGGTGGTG	CATTTCTGGAACCCAAGACG
BFU1154	KF266407	(AC)9	59/59.5	40/47.6	278	TGAAAAGGCAAAAAGTGCAG	GCTCGTGCGATTAGGAGATAA
BFU1155	KF266408	(GA)9	59.7/59.5	45/45	226	CCAACTGTGGAAAAGCATCA	TGGGACATGACGTTTCTTTG
BFU1156	KF266409	(TTTTTA)3	59/59.3	50/45	159	TGACCATGTTAGTGCCACCT	TCCTGAAACCTGTTCGCATA
BFU1157	KF266410	(GA)9	59.2/60.1	40.9/45	234	TCCCTAAATTACCCTTCCCAAT	AAAGCGACAGCGAAAACTGT
BFU1158	KF266411	(TG)9	59.8/59.1	50/42.9	297	CGATGCACTTTCCTTCTTCC	ACAATCCCAAGTCGAACAAAG
BFU1159	KF266412	(AC)9	59.3/60	40/45	253	ATGCCAAACATGGCCTAAAT	GATCCCAGCAATTCAAAGGA
BFU1160	KF266413	(AAACCC)3	60.2/60.2	50/45	142	CCCAAACCAAGGTCATCATC	AAGAAAGGTTTTGGGGGTTG
BFU1162	KF266414	(TAT)6	59.8/59.7	50/47.6	219	AGCTGCATAGGCAAAAGCTC	TGTCTCTCTTCACCCGTGATT
BFU1163	KF266415	(AC)9	60.1/60	50/50	185	AACGGCATTCTTGGTCTGTC	TCGGAAGTGGCTTCTGATCT
BFU1164	KF266416	(TG)9	60.5/60	42.9/45	109	TGTTTCTGAGTTGGGCATGAT	TTTCATGGTCAAGGTGGACA
BFU1165	KF266417	(TG)9	59.4/58.9	42.9/45	157	TCTCAAGGATCTTTGGCTTTG	TCCCTTGCTTTGTCACTTTG
BFU1166	KF266418	(GTGAGT)3	60.2/59.2	45/42.9	268	TGCATTGGAAGTGGTGAGAA	CACACAAATGAGCAACACACA
BFU1167	KF266419	(TA)9	59.5/59.4	50/45	298	GCGGACCACAGTATTGATGA	GCACGATGGTTGACAATGTT
BFU1168	KF266420	(TA)9	59/59.8	41.7/50	260	TCAGCCACTGAAGTAATCTAAAGG	TGGTCCAAAAGGGAGAGAGA
BFU1169	KF266421	(AC)9	59.5/59.6	50/42.9	161	TCCCACCACTTTCCTCTCAT	TTTCAAGACCTCCACGATGTT
BFU1170	KF266422	(CTTTTT)3	59.8/60.1	45/50	256	ATGGACCAACGTCATGAACA	AGCCCTTTCGATTCACACAC
BFU1171	KF266423	(TA)9	59.3/59.7	40/45	300	TTCCCAAGAACAATGCTTGA	TGATTGGGGCTATTCAGCTT
BFU1172	KF266424	(AC)9	58.3/59.7	43.5/50	288	CCCTCTTAGACTGAATCAAATCC	AAGTGCGTCACGCTTAGACA
BFU1173	KF266425	(AAAAAT)3	60.8/59.3	45/45	183	CCATGCCAAAACAGTCCAAT	GGGCATCAGCTTTCAGATTT
BFU1174	KF266426	(TG)9	59/60	45/33.3	153	GCCGATTAGGGTGTTTTGTT	CCCGAAAAGAAAGAGAAAATATGA
BFU1175	KF266427	(TC)9	59.1/60.2	50/45	139	TGGTGAAGTACCCGACAGAA	TTTTGGGGAGCAGAAAACAG
BFU1176	KF266428	(AC)9	59/59.9	40/40	193	TGGAAAGAAACAACCAACCA	CCAAACAGCAAAATCAGCAA
BFU1178	KF266429	(TG)9	60.2/59.8	45/50	278	CCTTGGTGGATTTTGGTTTG	TATACTTTGGCAGCGGTGTG
BFU1179	KF266430	(AGACTG)3	60/61	45/50	262	TGGATTCGATTACGTGGTGA	CCCGATCTCGTCGCATATAA
BFU1180	KF266431	(AC)9	59.8/60.1	50/50	257	ATTATGCACCTCCCATCAGG	GGCTGTTTACGTGGCAATCT
BFU1181	KF266432	(AG)9	60/60.4	45/50	171	CCAAAAGCTGCAAGCACATA	AGATGAGATTGGCGACGAAG
BFU1182	KF266433	(CCTCTT)3	59.5/59.2	50/45.5	197	AGCCGAACATAAGCTCTTGG	TGCGAGTATCTTCTCCTCTGAA
BFU1184	KF266434	(CA)9	59.2/60.1	40/45.5	283	TGTTCGGGCAATTACTTTCA	CCCCAATGAGATAGTTGTGGTT
BFU1185	KF266435	(ATACAC)3	60.1/59.8	47.4/38.1	296	TCCTGTTATGGTGGCGAAA	TCCATGATATGCAATTGGTGA
BFU1186	KF266436	(CA)9	59.9/60.4	50/50	231	TTATGCTGCAGGACTTGTGG	TCGGAGCACTAAAGCAAACC
BFU1187	KF266437	(GT)9	59.7/59.8	30.4/45	250	TTCCAAGCTTTTTGTTTTATTGC	GGGTGAGGTTTTGATTTGGA
BFU1188	KF266438	(TG)9	60/60	50/39.1	144	TCCTCTCCCCCACTTTCTTT	TCACACAACTCAAATTCACAACC
BFU1189	KF266439	(TG)9	58/60.1	47.6/45	180	TGGCTTCTGATCTTCACTGAC	AAAACGGCATTCTTGGTCTG
BFU1191	KF266440	(TG)9	59.7/60.6	39.1/45	212	TGAATTACCAAAGGCTAAGATGC	AAAATGTGTTCCCGCCCTAT
BFU1192	KF266441	(TTTTCT)3	59.8/59.4	47.8/45	108	TGTCATGACTAGAGAGGGACACA	TGGGTGTTTTTCATGTGAGG
BFU1194	KF266442	(TG)9	60/59.2	47.6/50	192	TCATACGGACTGTGTGGTCAA	TGCCACGTGTAGGTTCTGTT
BFU1195	KF266443	(TG)9	59.6/60	50/33.3	106	CACGTAACTCCATCCGAACA	TTCTTCTTTCTTTTTGGTGGTTTC
BFU1196	KF266444	(CA)9	60.6/59.5	45/50	174	TTGCCTCCATCGTTTGAAGT	ACCACACCAACAAAGTGTGC
BFU1197	KF266445	(CA)9	59.9/60.2	40/45	124	TCTTGCAAAAAGCAGAAGCA	TTCAAGCGGCTTTTGGTTAC
BFU1198	KF266446	(TA)9	60.1/59.9	40/45	150	GGCAATTTTTCGATGCTGTT	AATCGGCTTTCATTGGTGAC
BFU1199	KF266447	(CA)9	60/58.3	50/42.9	130	TACACACACGTGGGCAGAAT	TCATGTGAAAGGGAGAGTGAA
BFU1200	KF266448	(GA)9	59.5/60.6	50/50	166	AGGAATAGGGGACTAAGGAGGA	GCCGTCCATCCTTTCTTTCT
BFU1201	KF266449	(CA)9	59.9/60.4	50/50	221	TTATGCTGCAGGACTTGTGG	TCGGAGCACTAAAGCAAACC
BFU1202	KF266450	(TA)9	59.9/59.7	50/45	218	TAATCCGTATGGCAGGGAAG	CGAGATGACACGTTGCAAAT
BFU1203	KF266451	(AC)9	60/59.9	50/45	171	CGGCTTCTGCTGATGATGTA	CTTTGTGCTTCCCAAAAAGC
BFU1205	KF266452	(CA)8	59.7/58.4	45/30.4	151	TGTTGCTGGTTCAATTCCAG	CTTATGGCTTTTTCATTTTGTGA
BFU1206	KF266453	(AC)8	60/58.2	45/33.3	167	TCTTGGTCCAAAAAGGGTTG	TGACTGTAATAATGGCAATAAACG
BFU1207	KF266454	(TC)8	59.6/59.4	33.3/45	135	TTGCTTTGCCAGTAATGTATTTTC	TGCAAACAAGGAAGACAGGA
BFU1208	KF266455	(TTAT)4	59.3/59	38.1/42.9	154	TGGCCACATAATTTTCAGGTT	GCCAGGACCTCAATTCAATAA
BFU1209	KF266456	(AC)8	60.7/59.3	50/50	191	CCGGAAACACCCTTGACATA	ACAGGGATACAGGGGTTGAA
BFU1210	KF266457	(AT)8	58.6/59.1	30.4/37.5	286	AAAAGCAATCTCAAACGAACTTT	TGGGTACAAAACTAAATACGCTGT
BFU1212	KF266458	(TA)8	60.2/60	34.8/50	280	TCGCAATATCATCATACATTCCA	TGTGAGGCTCGAGTTCCTTT
BFU1213	KF266459	(AT)8	59.4/59.9	47.6/40.9	166	TCATGAGTCTCGGCATAGTCA	TGTTTGGACGATCCTGTTAATG
BFU1214	KF266460	(CA)8	60.6/60.3	50/40	218	AATCGCTTCTCATCCCTTCC	TGGTTTGGATGGCTTTGAAT
BFU1215	KF266461	(AC)8	58.4/59.8	42.9/40.9	156	TCCATGGCTAACAGTTTCTGA	TTGATCTATGCGATATGGTTGG
BFU1216	KF266462	(GT)8	58.2/59.5	33.3/45	143	GTGGTTGTAAATTTTAGGTTTTCG	CAACTGCCAAGCATCTTTTG
BFU1217	KF266463	(GA)8	60.4/60.4	50/40	126	GTTGCAGCGGAGCAATCTAT	CCTTGCCAATTTTCGATTTG
BFU1218	KF266464	(AT)8	59.4/59.9	47.6/40.9	166	TCATGAGTCTCGGCATAGTCA	TGTTTGGACGATCCTGTTAATG
BFU1219	KF266465	(CA)8	59.9/58.9	47.6/30.4	281	GCGAGCAGTACGCATTATTTC	AAACTCAATCATTATCGGCATTT
BFU1220	KF266466	(TG)8	59.9/58.7	40/45	277	TCGCAATAAACACCATTCCA	CACGAGAGATGGTGCAATTT
BFU1221	KF266467	(CA)8	60.1/60.6	45/45	193	AGGCAACGGTGAAAATTGAG	TTTTGAGCCCTCGATTGTGT
BFU1222	KF266468	(GA)8	59.3/60.5	50/50	271	TCGATCATATGGAGGTGGTG	CATTTCTGGAACCCAAGACG
BFU1224	KF266469	(AC)8	60.2/59.7	42.9/45	229	TGGACCATTATGGGTCTTTCA	TCTAAGCAGGCAATTGAGCA
BFU1225	KF266470	(TG)8	60.8/60.1	40.9/50	246	TGATGTGGTTTGTTGAAGTTGG	AGCCCACTGGATTTTCACAG
BFU1226	KF266471	(AAAG)4	60.1/58.4	50/42.9	170	ATGCGAACAGGTTTCAGGAC	ACATGTTGCATGTTGCTCTCT
BFU1228	KF266472	(TG)8	60.1/60	50/50	277	GGAATTGCAAGGCACGTACT	GATCCCGACTCTTTGGCATA
BFU1229	KF266473	(TTTA)4	60/59.8	45/50	166	GTGCAGAGCACGAAATTCAA	TATGCAGAGGCTGGAAAGGT
BFU1230	KF266474	(AC)8	60/59.9	42.1/50	147	AATGCGCCCACACAATTTA	ACATGGTCTTGTGCAGCTTG
BFU1231	KF266475	(AC)8	60/60	42.9/50	237	TTGCTCTAGCCACCAAAAGAA	GAAACAGGGGTTTACGACGA
BFU1232	KF266476	(AC)8	59/60.9	50/33.3	225	AGCTCCACCGGCTTATTAGA	CCAAATTGATTGACAAAATTAGCC
BFU1233	KF266477	(TG)8	59.2/59.3	45/47.6	206	TTTGCTTGACAGCGAGATTC	GGGACTCCACACACATTTTTC
BFU1234	KF266478	(TG)8	59.8/59.7	50/47.6	219	AGCTGCATAGGCAAAAGCTC	TGTCTCTCTTCACCCGTGATT
BFU1235	KF266479	(TA)8	59.5/59.5	40/40.9	164	TTTGAAAAGGGGTTCTTCCA	GAAAGCGAACTTGACAACTTGA
BFU1236	KF266480	(AC)8	59.7/58.2	42.9/36.4	195	TGGATTAGATGCCTTCTTGGA	AGCAGAGAAATTAATGGCAGAA
BFU1237	KF266481	(AG)8	60.7/58.3	40/40.9	199	GCGCAAACAATTTCATGTCA	GTCCGGAGACATTAAAATAGCA
BFU1238	KF266482	(TG)8	60.1/60.1	50/50	233	ATGCCTTGAAAGTCCCTCCT	CAACACCGTTATTGGGTTCC
BFU1239	KF266483	(GA)8	59.9/59.9	45/45	161	TGGTTTTCAGAGGGTTTTGG	TTCAAACGCTACCCATTTCC
BFU1240	KF266484	(AC)8	60.2/59.1	40/39.1	192	TGGTCGCATGAGCAAAAATA	GGAAAACCAACCTATATGATCCA
BFU1241	KF266485	(GA)8	60.3/59.9	50/50	288	CACTTGACAAAAGCGGACCT	GCCATCATCAACCCCTCTTA
BFU1242	KF266486	(TA)8	60.4/60.3	34.8/41.7	184	CAGAAACAAAATTGGGAACTTGA	CCCCTGAATTACTGTGACTTTTTC
BFU1244	KF266487	(GT)8	59/59.8	41.7/50	260	TCAGCCACTGAAGTAATCTAAAGG	TGGTCCAAAAGGGAGAGAGA
BFU1245	KF266488	(CA)8	59.5/58.2	50/50	157	AGCCATGTCAGCTTTTAGCC	ATATTGGAGGAGGAGCTTGG
BFU1246	KF266489	(AC)8	59.8/58.9	42.9/42.9	239	CTTTCAGGAAGGGCTTTTTGT	TCCTTTAGTGGGAAGGGAAAT
BFU1247	KF266490	(TG)8	60.2/60	50/50	164	ATCACCCACATCGGATCACT	GGGACAAAAACCACCAGCTA
BFU1248	KF266491	(ATTA)4	59.5/60.1	50/42.9	163	TCCCACCACTTTCCTCTCAT	TTTTTCAAGACCTCCACGATG
BFU1249	KF266492	(TG)8	59.9/60.2	50/50	212	AGGTTTGTGTGTGGTGTGGA	TTGCTCGATCGTCCTAATCC
BFU1250	KF266493	(TA)8	59.3/59.3	33.3/45	204	TTCACAATAGCAAAAGTTTGTGTG	TTAACTTTGAGCACCGTCCA
BFU1251	KF266494	(GT)8	59.1/60	45/45	206	AGCCCCGTTGAATAAACAAG	ATCGAGCGAGCACTTTGATT
BFU1252	KF266495	(GT)8	59.1/59.7	45/50	267	TGCTTGGATGAGGATTACCA	GTGAGGGAAGAAATGGCAAG
BFU1253	KF266496	(TG)8	60/60.9	50/50	140	GCTGGGTGGCTAATGTCAAT	AGGGCAGGCAGGTATTTTGT
BFU1254	KF266497	(CA)8	58.2/59.9	50/36.4	298	TACACCTTGGCTGTCAACCT	CAAACTGTGCCAATTTTATCCA
BFU1255	KF266498	(TG)8	59.4/59	47.6/36.4	201	AGGTCTTGACCGTATCATCCA	TGCAATAAAAGGTTCACAATCC
BFU1256	KF266499	(TTTA)4	59/60.1	50/45	132	CAACAGAAGAACCCCCAACT	TTCCACCCAAAGACAAAAGC
BFU1257	KF266500	(TG)8	60/58.5	45/42.9	240	GCGTGTTTGTGCATTTATGG	GGGAATCAGTTTCTTGTTTGG
BFU1258	KF266501	(AC)8	59.3/60.1	50/50	221	CAAAGGAGGGAGGCAGAATA	GAACGAAGGGAAGGAAAAGG
BFU1259	KF266502	(AC)8	59.5/60.2	50/50	299	TCACGCATGAGTTAGGCACT	GAGCCTTGCAGACCATGATT
BFU1260	KF266503	(AG)8	58.7/59.9	34.8/50	165	CAAATTCAATTATGTTGCAGAGG	CCTGTGTCGTCGGGTTTATT
BFU1261	KF266504	(AAAT)4	60/60	45/45	287	ATGCCACAACCACACAAGAA	AAATGCTCCAAACGGTATGC
BFU1262	KF266505	(AAAC)4	60/59.6	50/38.1	130	AAATGCAGTCTCCAGCTCGT	TGTTTCTTTCTTGTGGGCATT
BFU1263	KF266506	(TG)8	60.1/59.1	40.9/47.6	121	TCCCCCTCTTGATATTGAATTG	AATCCCCAGCCAGATACTCTT
BFU1264	KF266507	(CT)8	58.7/60.1	38.1/50	271	TGAAAACACATCCAAAGTTCG	ATGCCAATTCACCCTCTCTG
BFU1265	KF266508	(AC)8	59.7/59.3	33.3/50	209	GAAAATAATTTGGGAGGAGATCAA	AACAGTTCGGCAGAAAGGAC
BFU1266	KF266509	(GA)8	60.1/60.1	45/45	169	ACTGGCAATCGATGTCACAA	GTTGCCTTTTTGGACTGCAT
BFU1267	KF266510	(AAAT)4	60.1/60.1	50/50	296	ACTCAGTGCCCGTCATTTTC	TACCGCCACTTCTTTTGTCC
BFU1268	KF266511	(CACG)4	60.2/60.1	50/47.4	206	TCCGAATTGACGTCTTCTCC	TTATTTGGCAGGTGCGTGT
BFU1269	KF266512	(TG)8	59.9/60.3	45/50	239	TGGATCATTGCCTCCATACA	GTTATAAGCAGCGGCATCGT
BFU1270	KF266513	(TTTA)4	59.6/60.1	45/50	221	GTTTCGGCGTTTTGTTAAGG	TTGGGTGGGTGGAGTATTGT
BFU1271	KF266514	(TA)8	59.6/60.3	50/50	175	AACATAGAGCAGGCACTGTGAG	TACCTTGAGCTACTCCCCTTCA
BFU1272	KF266515	(AG)8	59.8/60.1	45/40	294	CCATTCACATCTTGCTCGAA	TTTGTTTTGTTGCAGGTGGA
BFU1273	KF266516	(AAAT)4	59.8/59.9	50/45.5	276	GTGTGTGTTTTGCTGGTGCT	AGTTATGCCACATGTCACCAAG
BFU1274	KF266517	(TGCA)4	59.6/59.9	50/40.9	244	AGCCACCTAGACCCAATTCA	GCAGAAGCACAAATGCATAAAG
BFU1275	KF266518	(AC)8	59.8/59.9	50/40.9	177	CCTTGCTAGCCAAAAGATGG	GGAAAATAAAACCCACTTGCAG
BFU1276	KF266519	(TTTA)4	59.8/60.1	45/34.8	200	TATCGCCTTGCTTCATTCCT	TGCAAATTTAGGGTTCAAGAGAA
BFU1277	KF266520	(GA)8	59.2/58.8	40/47.6	211	ACAAACGACAAAGGCATTGA	TGCTGAGGAGGTTGGTAATCT
BFU1278	KF266521	(AC)8	59.5/60	43.5/34.8	158	TGTTAGAGGATTTCTCACCATCC	CAAACATTTTGCTCATTCCTTTC
BFU1279	KF266522	(TTAA)4	60.1/59.5	42.9/50	165	TTTTTCAAGACCTCCACGATG	TCCCACCACTTTCCTCTCAT
BFU1280	KF266523	(CA)8	60.1/59.3	50/45.5	190	TGGTGGAGCACCATGACTTA	CGGGTTATAGCCCTAAACACAT
BFU1281	KF266524	(TA)8	60.9/60	50/45.5	199	CCATTTTGGCTCTTGCTCTG	AACACCACACACGTTTTACTCG
BFU1282	KF266525	(ATTT)4	58.7/59.5	50/47.6	142	TGCACACTGGACCATACAGA	CGTCCTAGCAAAGAGACCAAA
BFU1284	KF266526	(GT)8	60.4/60.2	47.4/50	189	AGAACAAACCGCCACCAAT	GCATTGGAGGAGCAAGTGAT
BFU1285	KF266527	(TG)8	60/59.7	50/47.4	174	CCTTACAATGCACGCTCTCA	CATGCCATTGCCTTCAGTT
BFU1286	KF266528	(AG)8	60.4/60.3	45/50	232	ATTTGGATGGATGGGAAGGT	GGGACATCAGCAATTTGGAC
BFU1287	KF266529	(CT)8	60/60.9	47.6/45	131	TTCCCGTGAAGTCTTCTCTCA	ATGACAATCCCATGCTTTGC
BFU1288	KF266530	(ATT)5	60.1/59.6	50/47.6	265	GGTAGGGTCCAAAGTACCAACA	AATGTGGGAGAGGAGGAAAAG
BFU1289	KF266531	(AAAAT)3	59.9/60.8	40/50	276	GCATGGGATTTTTCTTGGAA	CCAGTGAAAGCCAAGCAATC
BFU1290	KF266532	(GAA)5	59.9/59.9	50/50	294	AGGCACAGTTCAGGAGCAAT	GCCCAGGTTTATATGCGTGT
BFU1292	KF266533	(ATT)5	59.9/60.2	40.9/50	171	TCCCTAAATTACCCTTCCCAAT	TGCACTGCATGAGACACAGA
BFU1293	KF266534	(TTA)5	59.8/59.5	50/38.1	298	CGATGCACTTTCCTTCTTCC	AACAATCCCAAGTCGAACAAA
BFU1294	KF266535	(TTATT)3	59.7/60.3	40/50	169	CACAAGCCATTTTTCGTTCA	CCTAGGCATCAGTGCATCAGTA
BFU1295	KF266536	(AGA)5	59.7/60.7	42.1/45	139	AAGCCCAAAAACGCAACTT	AGGAACGTTTTGCAGGAACA
BFU1296	KF266537	(ACT)5	60/60.5	50/50	197	CCATGCCAAACCTATCGAGT	CAAAAGGGGGTTAAGGATGG
BFU1297	KF266538	(AAAAT)3	60.3/59.1	50/50	286	GCCTTCACAACTTGGATGCT	CACTAAGCTGCTTTGGTGGA
BFU1298	KF266539	(CAAAA)3	60.1/60	40/50	199	AGCATGCTTTTTGGTTTTGG	GTTGCCCTTGCAAAGAAGAG
BFU1299	KF266540	(TTA)5	59/60.1	50/45	132	CAACAGAAGAACCCCCAACT	TTCCACCCAAAGACAAAAGC
BFU1300	KF266541	(ATT)5	59.8/59.5	45/47.6	203	GCACTGGAAATTGATGCAGA	GAATGCGTAAAGATGGTGTCC
BFU1301	KF266542	(GTATT)3	60/60.2	50/42.9	298	CACAAGACCGAATCTCAGCA	TCCGTGAAACTATGTGTGCAA
BFU1303	KF266543	(TTA)5	60.3/60	50/45	248	CCCATCCACTCTCCAAAATG	CATGCCATCAGCTTTCAAGA
BFU1304	KF266544	(TTATT)3	60.3/59.9	45/40	285	AAATGCCAGTGAAAGCCAAG	GCATGGGATTTTTCTTGGAA
BFU1305	KF266545	(AAATA)3	60.1/59.6	50/40	252	TGTGTGGATGGGTGAGAGAA	TCATTTCATTTTGGGGAACC
BFU1306	KF266546	(TG)7	59/59.5	50/45	153	TACTCTGGCCCCATTGTGTA	CGGGGTGATATTGGATTCAT
BFU1307	KF266547	(AT)7	59/59.9	40.9/50	273	CATTCCCAAACTCAGTTAACCA	CCAAGACGGTATTCCCTCAA
BFU1308	KF266548	(CA)7	59.9/60.2	43.5/45	281	TGACATGGTCAGTCATACGAATC	TGCCATCCTTGTTCTCATCA
BFU1309	KF266549	(CA)7	60.2/59.6	50/38.1	293	GCCATCCTCATCTTCTTGGA	TTTGTCTTCAATTGCCAGGTT
BFU1310	KF266550	(TG)7	59.7/58.9	34.8/42.9	295	TTGCAAGCGGTTATTAGATTTTC	CACCCTTTCTTTTCAAAGTCG
BFU1311	KF266551	(CA)7	60/60.2	45/43.5	231	GCAAAATGCCTAACGTGGTT	CATCTAGCATTGCAGGTGTATCA
BFU1312	KF266552	(AG)7	59.3/58.8	40/45	185	AACCCCCATAAGCAAAAACA	CCGTTTTCACTTCCTGTTGA
BFU1313	KF266553	(AC)7	59.6/59.7	38.1/45	203	TTAAACCCACCACCAAAAATG	GCATCGAGGAAAACAACACA
BFU1314	KF266554	(TC)7	59.6/59.7	45/39.1	170	GGCTTTGGTGTGCATTTGTA	TGTGGTGAAAATATGATGGTCAG
BFU1315	KF266555	(AC)7	60.1/59.3		199	TGGTCAGCCGAACAACATTA	GGCTGATCAGAGCCGATTAT
BFU1316	KF266556	(GT)7	60.1/59.6	50/47.6	265	GGTAGGGTCCAAAGTACCAACA	AATGTGGGAGAGGAGGAAAAG
BFU1317	KF266557	(CA)7	59.5/60.1	31.8/50	198	TTCACTGCCATTGCAATAAAAT	CACAACTGCCTTGCTTCGTA
BFU1318	KF266558	(AC)7	60.2/58.8	40/38.1	119	ACAAATTCCACCCGCAAATA	TGCACAACATCTAATGCAACA
BFU1319	KF266559	(TG)7	58.9/59.8	40/45	183	AAATTTGTCCAAAGGCCAAC	TGCATGGCAGACAAAGATTC
BFU1320	KF266560	(CT)7	59.2/59.9	33.3/45	277	TTCGAATTCATTTGTCAACGA	CTGGATCCTGCCATTTTGTT
BFU1322	KF266561	(GT)7	59.9/60.1	50/42.9	134	TTTGCTCTCTCTGTCTCTGTGC	AACGCTCCCTTCATTTCAGTT
BFU1323	KF266562	(AC)7	59.1/59.6	45/45	126	ATCTGCATCCAACTGAACCA	AGCGACAGGTGTTTGGAAAT
BFU1324	KF266563	(TG)7	58.9/59.7	37.5/45.8	300	CCATTAGACCACTTTGCTTCTAAA	TGACAATCTCAGGTCAGTACCTTC
BFU1325	KF266564	(AC)7	60.4/60.4	50/40	126	GTTGCAGCGGAGCAATCTAT	CCTTGCCAATTTTCGATTTG
BFU1326	KF266565	(AC)7	60/60	45/50	260	TGGCATGTGTTATGCAACCT	TCAGCGACTTGACAATGAGG
BFU1327	KF266566	(AC)7	59.9/60.3	50/45.5	300	AGGCACAGTTCAGGAGCAAT	TCTATCGCCCAGGTTTATATGC
BFU1328	KF266567	(AC)7	60.2/59.8	45/45	263	GGCCTTCACGAAAAGCAATA	TGTTTGGGAGCCCATTTTAC
BFU1330	KF266568	(AG)7	58.4/60.2	33.3/45	167	AATAGGTTGTTGAGGTTGCTTAAA	TCCATCCCCCAAAGTTGTAA
BFU1331	KF266569	(TG)7	59.9/59.9	50/42.9	220	AACCCGCTCACCAACATTAC	TCCCTGGTTAGAAGGGAAAAA
BFU1332	KF266570	(AT)7	59.9/60.2	36.4/45	176	TCACATGCTTGCTGAATTTTCT	TAATGCAATGAGTGGCTGGA
BFU1334	KF266571	(GA)7	58.9/59.9	45/50	232	AGGAAAGCATAAAGCCAGGA	CGTATAAATGCAGCCCTGGT
BFU1335	KF266572	(CA)7	59.1/59.9	43.5/47.6	217	GAAATCCCATGATGATCTCTAGC	GCCGATTAACTGATCCTTTCC
BFU1336	KF266573	(TG)7	58.1/60.1	45.5/38.1	174	GTTCCTCAGAAGACAAACGAAG	GCCGATAAAAATTGCACTTGA
BFU1337	KF266574	(CA)7	59.3/58.2	50/34.8	225	TGCCACATCAGTGGAGAGTT	CCCTCATGAATAAGTAAATGCAA
BFU1338	KF266575	(CA)7	59.9/59.7	37.5/36.4	199	AAATAGGCAAACAGGTAATCTTGC	CGAAGTGCAAAATTGTTTATCG
BFU1339	KF266576	(GT)7	60.6/58.8	45/45	286	GCCTCACATGCATGAATCAA	GGACCCGATATTGAAAGGAA
BFU1340	KF266577	(TG)7	59.9/59.7	50/45	222	TAATCCGTATGGCAGGGAAG	CGAGATGACACGTTGCAAAT
BFU1341	KF266578	(TG)7	60.3/60.2	45/50	288	TCAATCGTCATCCCTTGGTT	TGTCCCGTACAGTGTGGTACAT
BFU1342	KF266579	(GA)7	60.7/58.3	40/40.9	199	GCGCAAACAATTTCATGTCA	GTCCGGAGACATTAAAATAGCA
BFU1343	KF266580	(TG)7	59.1/59.9	40.9/50	108	TTCCTCAGAAGACAAACGAAGA	TTCCCAAACCAAGAGTGACC
BFU1344	KF266581	(CA)7	59.6/58.4	45/47.6	235	TGGAATTGGGTGGAAATAGG	AGAAGTTTTAGGAGGCCCTGT
BFU1345	KF266582	(AC)7	58.6/60	34.8/47.6	143	CAAAACCAAGATTCATTATGTGC	TGGGATACATCCTTGTCTTGC
BFU1346	KF266583	(AT)7	60.9/58.3	50/38.1	177	AGCCATGCTGATCAGGAGAA	CATGATTCCGTGACACATTTT
BFU1347	KF266584	(AC)7	59.3/60.2	31.8/45	109	TCTTTTCATGCAACAAACACAA	ATGCCACGAAGTGAAACACA
BFU1348	KF266585	(AC)7	60/59.5	50/45	272	CCTGTTGACAAGCGCATAGA	GCGCAAACAGCCTTTATCTT
BFU1349	KF266586	(TA)7	60.7/60.1	45/38.1	118	ACTCCAAAGGCAACCCAAAT	TGGCATTTGTGCATTGTTAGA
BFU1351	KF266587	(AT)7	59.9/60.2	50/50	212	AGGTTTGTGTGTGGTGTGGA	TTGCTCGATCGTCCTAATCC
BFU1352	KF266588	(CA)7	60.2/59.5	45/38.1	183	ACCCTGAACAAATGGGCATA	AAACTTGCATTGGTCGTTGTT
BFU1353	KF266589	(AC)7	59.8/59.5	45/50	212	TGTTGGCAGCATTCAATCTC	CAGGTCAATGATGGTGAGGA
BFU1354	KF266590	(TC)7	59.9/59.7	45/40	278	TCTTCGCGAAACGAAGGTAT	CAGCAAAATTCGCACACATT
BFU1355	KF266591	(TG)7	59.5/59.2	50/45.5	197	AGCCGAACATAAGCTCTTGG	TGCGAGTATCTTCTCCTCTGAA
BFU1356	KF266592	(AC)7	60.1/58.9	45/42.9	167	TATACTTTCGGCGGATTTGC	TGAAAGCAGCGTAGAGAACAA
BFU1358	KF266593	(TG)7	60.4/60.1	50/50	198	TGGATGAAACACCCTCCAGT	TCTCCCAATTCCGTAACAGC
BFU1359	KF266594	(TC)7	60.1/60	45/50	112	TCTCCCATGATGGATTGGTT	GGCTTGAGAATGTGCTGTGA
BFU1360	KF266595	(CA)7	59.8/58.7	40/37.5	286	TTCATGCAACATGCTTGTGA	AATCAGTTAATTATGCGGTGTCTC
BFU1361	KF266596	(AT)7	58.7/60.1	45/50	252	GCCTCATGCTTGGTTTGATA	GACTTTGGCGCAATACCCTA
BFU1362	KF266597	(AG)7	59.7/59.8	30.4/45	250	TTCCAAGCTTTTTGTTTTATTGC	GGGTGAGGTTTTGATTTGGA
BFU1363	KF266598	(TG)7	59.7/59.6	45/38.1	203	GCATCGAGGAAAACAACACA	TTAAACCCACCACCAAAAATG
BFU1364	KF266599	(AT)7	58.3/59.8	45/45	178	CAGGCGGCACAAAATATTAG	GGCCCATATTGCAACAAAGT
BFU1365	KF266600	(CA)7	59.7/59.9	40/45	249	CGCTTTGTGATTTTGATGGA	CTCATGGATTGGAGGCAAAT
BFU1366	KF266601	(AC)7	59.2/59.5	37.5/50	165	TCTCTCTCTTTTTCGACCTTTCTT	TGATTGTGACCACTCCTTGG
BFU1367	KF266602	(AC)7	59.9/60.2	40/50	299	AATTTGCGCGTCTGTTTCTT	TGGAAGCAGCTCAGTTGTTG
BFU1368	KF266603	(TG)7	59.6/58.5	50/33.3	215	TGGCATAAGAGGGGAACACT	CACAAACACAACAACATAAACACA
BFU1369	KF266604	(TG)7	60.2/60.4	50/50	272	GCTCCTGGTTGGAAAGTCAA	ATGAAAACGCCTGACAGCTC
BFU1371	KF266605	(TG)7	60.1/60	50/45	295	GCATCCACAACCGACTTTCT	TGTTGGTGACAAAGGACCAA
BFU1372	KF266606	(CT)7	59.9/60	45/50	252	GTCACCAATGAAAGCCGATT	ACTTAGACTTCGCCCCCATT
BFU1373	KF266607	(CA)7	59.7/59.9	45/50	224	CGAGATGACACGTTGCAAAT	TAATCCGTATGGCAGGGAAG
BFU1374	KF266608	(GT)7	59.9/59.5	45/40.9	233	TTAATTTGTGCTGCGAGTGG	TTGTTGTCGCTGCTCTAAATTC
BFU1375	KF266609	(AC)7	60.3/60.8	40/45.5	265	AAGAATTTGCCCCAACATGA	CAGAAGCACTTTTTCTCCGTGT
BFU1376	KF266610	(GT)7	60.1/60.4	45/45	299	AAGGCACAAGGCAACATTTC	GCAAAAGTGCAAGAGGCAAT
BFU1377	KF266611	(TG)7	60.1/59.6	47.6/38.1	195	CATCCTAATGTGGCAAGGCTA	TCTTTCCCACGCGAAATATAA
BFU1378	KF266612	(TG)7	60/59.6	45/47.6	252	GGGGAAACCATCCAATTCTT	AGTAGCCCACAACATTCCAGA
BFU1379	KF266613	(TG)7	59.9/59.7	50/45	218	TAATCCGTATGGCAGGGAAG	CGAGATGACACGTTGCAAAT
BFU1380	KF266614	(AC)7	58.7/59.9	45/40	273	CACGAGAGATGGTGCAATTT	TCGCAATAAACACCATTCCA
BFU1381	KF266615	(TC)7	60.3/59.9	45/40	285	AAATGCCAGTGAAAGCCAAG	GCATGGGATTTTTCTTGGAA
BFU1382	KF266616	(GT)7	60.1/59.7	50/50	269	TGTGTGGATGGGTGAGAGAA	CATCAGCCGGTACATCTTCA
BFU1383	KF266617	(ATTT)3	59.7/58.4	45/30.4	151	TGTTGCTGGTTCAATTCCAG	CTTATGGCTTTTTCATTTTGTGA
BFU1384	KF266618	(TTCT)3	59.9/59	42.9/40.9	238	TCCTTTCATAGGAAGGGGAAA	TGGTTAACTGAGTTTGGGAATG
BFU1385	KF266619	(TG)6	60/60.1	50/50	119	CCTCCTTCTTCCATGACCAA	GCTGCATGCAAACACACTCT
BFU1386	KF266620	(ATTA)3	58.3/59.7	45/47.6	299	TGAGGCCATGTTGAAGAGTT	TTGTGAGGTGGTAATGGGAAC
BFU1387	KF266621	(ATAA)3	59.3/59.5	40/45	173	TTGCTGGGTCAAATGAGAAA	AGGAATGATGCATGTTGCAC
BFU1388	KF266622	(TG)6	59.5/60	50/50	263	TTATCCCATGCTGGAGGAGT	TGTGCTTGTGGCTTCAGTTC
BFU1390	KF266623	(TG)6	59.9/60.1	50/42.9	189	CAGAAGGATGGTGACGGATT	TCCCATGTTGTTTCTTGCTTC
BFU1391	KF266624	(TAAA)3	59.4/60	33.3/40	157	CATCAAATGCAATTCAAACCA	TGCCAAATTGCACGTTATGT
BFU1392	KF266625	(AT)6	59.6/59.8	50/34.8	174	AAGGTGAGGCAACACCTCAT	TGGGATATCTTTCTTTCATTCCA
BFU1394	KF266626	(TACA)3	59.5/60.1	31.8/50	198	TTCACTGCCATTGCAATAAAAT	CACAACTGCCTTGCTTCGTA
BFU1395	KF266627	(CA)6	60.2/60	34.8/50	280	TCGCAATATCATCATACATTCCA	TGTGAGGCTCGAGTTCCTTT
BFU1396	KF266628	(CA)6	58.5/59.9	50/50	264	GCGCGCATACAAACACTT	TGCTTTGTTGGCTACACCAG
BFU1397	KF266629	(AC)6	59.4/59.9	47.6/40.9	166	TCATGAGTCTCGGCATAGTCA	TGTTTGGACGATCCTGTTAATG
BFU1398	KF266630	(TTCA)3	59.7/58.9	45/50	269	CTTGCATTTGGGTTGCTACA	TAGTTCGGCTTTGACCCTCT
BFU1399	KF266631	(AAAT)3	60.2/60.1	50/50	211	TGGCACATCATGGTACATCC	AGCCTGCAGAGAAGTTTCCA
BFU1401	KF266632	(GT)6	59.7/60.1	40/45.5	231	TTGCTCGATCTTGCTGAAAA	CCAATCTCCTTTGGAAAGTCTG
BFU1402	KF266633	(TC)6	59.5/59.5	50/42.9	144	AAACTCAATAGCGCCTCTGG	AAAGTTGGGACCTGTTGTTCA
BFU1403	KF266634	(TA)6	58.8/59.1	38.1/47.6	130	TCTGCCATTTCCTTCTCATTT	TCCGAGTAAGAGCGACAGATT
BFU1404	KF266635	(AC)6	58.3/59.9	39.1/40	170	TTCCTCCTGTAATGATAATGCTG	GGGTTGCCTTTCAATTTTCA
BFU1405	KF266636	(TGGT)3	60.4/60.3	50/50	286	TCCTCGTCGAACCTCTTTTG	GACACCACCATGTCAACCAA
BFU1406	KF266637	(TTTC)3	59.9/59.9	50/50	294	AGGCACAGTTCAGGAGCAAT	GCCCAGGTTTATATGCGTGT
BFU1407	KF266638	(AC)6	58.2/59.8	47.6/45	129	AGTCACTTACACACGCCCATA	TAACGTTGCGGGGTTTTTAC
BFU1409	KF266639	(CA)6	59.6/59.8	40/50	165	CAAATGATGGATCGAGCAAA	AATGGAGGACAAACCGTCAC
BFU1410	KF266640	(AT)6	59.1/59.5	40/47.6	278	TGAAAAGGCAAAAAGTGCAG	GCTCGTGCGATTAGGAGATAA
BFU1411	KF266641	(GT)6	59.7/59.5	45/45	226	CCAACTGTGGAAAAGCATCA	TGGGACATGACGTTTCTTTG
BFU1412	KF266642	(AC)6	59.9/60.2	36.4/45	176	TCACATGCTTGCTGAATTTTCT	TAATGCAATGAGTGGCTGGA
BFU1414	KF266643	(AG)6	58.9/60	45/50	232	AGGAAAGCATAAAGCCAGGA	CGTATAAATGCAGCCCTGGT
BFU1415	KF266644	(GT)6	59.9/59	50/50	120	ATGCATATCTCGGTGGGAAG	AGCAACACTGCACACTCACA
BFU1416	KF266645	(TTCT)3	59.9/60.5	42.9/50	188	TCTGTGCATGTCAATTTGCTC	GGCACAGCCTAGCAAAAGAA
BFU1417	KF266646	(TGCA)3	60.7/60.3	45/45.5	111	TTGTGCAGCATGTGTTTTCC	GGTTGACATCACAAATGACAGG
BFU1418	KF266647	(AC)6	60.4/59	42.1/43.5	248	GGCAATGCCATGATTTTCA	GGAAGGCTTATTAACCATACGTG
BFU1419	KF266648	(ATT)4	59.4/60.4	45/45	210	GAATTCATATGGCGTGTCCA	TTGGTTTTGACACCGTGTTG
BFU1420	KF266649	(ATTT)3	59.6/59.1	45/42.9	267	GCGAAACTATTTGGGATTCG	TGTTCCATATTAAGGCCGAAG
BFU1442	KF266650	(TA)10(TG)8	60.3/59.2	42.9/37.5	200	TGGAAATGATGATCCCAATGG	TACGTCTAATGAAACCAAACATGC
BFU1443	KF266651	(AC)11	60.3/59.6	50/45	231	TCAAGTTACACGAGGTGGACCA	AGGATCGCAATTAAACCCCA
BFU1444	KF266652	(ATTT)3	61.7/62	57.9/66.7	247	ACCCCGCCAGGCTTGTTAT	CCACATGCCCCGCAGACT
BFU1445	KF266653	(GT)7	57.5/57.4	25/36.4	108	CTTTTGGATTGTTTTTTTGGTTAT	TCGGCTTACATTAAAGGATTCA
BFU1446	KF266654	(TC)9(TA)13	60.7/60.2	50/37.5	276	TGGTTCAAGGAGGCTAAGGAGA	CTTTCAACTTTTAGCAAATACGGC
BFU1448	KF266655	(TA)11	59.6/59.8	45/40.9	307	TCCGGCTCCAATTCAGAAAT	GGAACAAAACAAACATCAACCG
BFU1450	KF266656	(AC)10	57.1/56.8	37.5/33.3	230	TGTATGGTTTATCAATCCTACCCT	AACAAATACTCCATGATGAATCCT
BFU1451	KF266657	(AC)9	59.6/60.5	50/47.6	235	GTGCTGCTGGTCTTCCTATCAA	CCACCACCCAAGAAATGTTCA
BFU1452	KF266658	(AC)9	58/58.3	41.7/47.6	303	AGATACAGTTCCCTATACATCGCA	TCTTCCAGGTGAGCATCATTG
BFU1453	KF266659	(TG)9	59/58.1	37.5/45.8	200	TCACCAATTACATGTTTATGCCTC	CCTATATTGGCGTGACTAACAGTC
BFU1454	KF266660	(AG)8	60.8/59.9	45.5/39.1	287	GCACACCAAATACACGAAAACG	GGAATATGGGGTAAAAATTGTGC
BFU1456	KF266661	(AC)12	59.4/59.9	40.9/40.9	273	TTGAATATGCCTCCTTGCTTGT	TGTTTGCTCCATTATGCATCCT
BFU1457	KF266662	(AC)11(AT)8	59.4/59.3	47.6/42.9	178	GTTCGCAGCATACATGCACAT	TTCCATTGGAACCTTGTTGGT
BFU1459	KF266663	(TA)11	59.7/59.7	52.6/55	299	GCATTTGCCCTCTTCCCAT	TGAGAATCACCACCACAGCG
BFU1460	KF266664	(TC)14	60.7/60	47.6/37.5	156	TGGGGTAAATTGCACCATCTG	TATTTTGAGTGAATCCTCTTGGGA
BFU1461	KF266665	(GA)7(GT)7	60.2/60.3	45.5/56.5	249	TGTTGCTTTGCCTATGGCTTAG	CCTCTCTCTGCCCTTCTCTACCT
BFU1462	KF266666	(AC)9	59.6/59.7	37.5/39.1	229	CAGGGAATAATGTTTGAAAGAAGG	TGCTTTCGACAATTTATGGTGTC
BFU1463	KF266667	(AT)9(GT)11	60.1/60.2	52.4/41.7	232	TCGACACTTGGTAGGTTTGGC	CCTCACGATAATGACGGATTGTAT
BFU1464	KF266668	(CTT)4	59.6/60	60/40.9	273	TTCTCCCACCAGAGGCTGTC	GATCCAATCAATGCAGGAACAA
BFU1465	KF266669	(AC)7	58.8/58	47.6/33.3	289	ATTTGAGGAGCAAGTGAGGGA	TGAAAATCCATACAATACAGCACA
BFU1466	KF266670	(TTAA)3	58.3/58.8	43.5/41.7	198	GGCCACCATAACTTATCCGTATA	TGCAAGTAGGGTCTACAAATCTCA
BFU1467	KF266671	(TA)12	57.6/57.8	39.1/33.3	293	TGACTTTGCATCTAAACAGGTTG	TGCAAAATCGTACAACTACAAAGA
BFU1470	KF266672	(CA)10	59.3/59.3	45.8/33.3	102	TTCTTTCTACTTCCTGCCCTACAC	TGGACCATTTACAACTCAATTTCA
BFU1471	KF266673	(AAAT)3	58.3/58.6	33.3/66.7	131	GAACATAAAAAGTTGATCCCAACA	CCACCCAAGTCTAGCGGC
BFU1472	KF266674	(TG)7(TA)9	59.3/59.4	37.5/52.4	268	TACGACAGCCTTAAACTTTCAACA	AGAGGTCAAATAGTGCGTGGC
BFU1473	KF266675	(CA)8	58.7/59.5	41.7/50	191	TCTTCTTCGTCGTAGTATCCATGA	GGTTTCTGTGATGCCCTGTATG
BFU1474	KF266676	(CA)7	60/59.4	37.5/41.7	255	AACAACGACATAGGCATTTCAGAT	TGTGTTCAGACATTAGCGGTTTAG
BFU1475	KF266677	(TA)7(CA)11	58.7/58.4	40.9/41.7	204	ATGAGGGTTTTGTTCAACGAAG	TTACAATCTTCACAACTGAGCCTC
BFU1476	KF266678	(AG)14	59.5/59.7	43.5/52.4	252	AGCGGAAAATAGAGAGACTGGAA	TTCTGGCTAACACTAGCGGCT
BFU1477	KF266679	(ATTT)3	59.5/59.9	41.7/45.5	218	ATAAGGTGATTAGAAGAGCAACGC	TCTTCACCTTCTCTGCAAACCA
BFU1478	KF266680	(AAAT)4	59.3/59	43.5/41.7	194	AATAAAGGGTAGGAGATGGCAGA	ACTGACCTTACCAAACATCAACCT
BFU1479	KF266681	(TCTCTT)4(TC)8	60/60.1	37.5/42.9	239	ATTTTAATAGCCACGAGGTTGATG	AGTTTTGGCAATGAATGTGGC
BFU1480	KF266682	(TG)7	60.7/59.8	52.4/43.5	234	TCTGATGGGACATACGGTGGA	GTAAGCATCTAAACCCCTTTGGA
BFU1481	KF266683	(AC)23	58.2/58.4	33.3/47.6	249	TACGATGTAATTTGTATGTTGGCA	GGCGAAGAGGTAAAATCCAAC
BFU1482	KF266684	(TA)10(TG)13	60.2/60.5	33.3/47.8	239	TCAATCCTGCTCATCAAAGAAAAT	GCCATTCAATCTCACGGAACTAC
BFU1483	KF266685	(AC)7(AT)14	59/58.5	40.9/34.8	246	AGCAAAAACATTACCGATCCAG	GTTTTCTTCGGACAGTTTTTCAA
BFU1484	KF266686	(GT)6	60.9/59.7	43.5/50	234	ACCCGTATCATTATGCTCCATTG	CCTGTAACACGAAGGAAGAGCA
BFU1486	KF266687	(CA)9	58.3/58	39.1/33.3	257	AACAATGGTTGCCTTATACAAGG	GCAACTTACATTAATGGGGAATAA
BFU1487	KF266688	(AC)13	59.2/60.2	61.1/45.5	184	CTTGTGATTGGCCTCCCG	ATCTTGGGTGGACCATTCAATC
